# Supplementary material for: Palladium nanoparticles generated in situ used as catalysts in carbonylative cross-coupling in aqueous medium
Source: Royal Society of Chemistry journal article supplement (doi:10.1039/c6ra02889f), 2016-01-01
Supplement: c6ra02889f1.pdf [file c6ra02889f1.pdf]

## Supporting information

### Palladium nanoparticles generated in situ used as catalysts in carbonylative cross-coupling in aqueous medium

P. Wójcik<sup>a</sup>, M. Mart<sup>b</sup>, S. Ulukanli<sup>b</sup>, A.M. Trzeciak<sup>a\*</sup>

<sup>a</sup> University of Wrocław, Faculty of Chemistry, 14 F. Joliot-Curie, 50-383 Wrocław, Poland

<sup>b</sup> Department of Chemistry, Faculty of Science and Letters, Osmaniye Korkut Ata University, 80000 Osmaniye, Turkey

\* corresponding author, e-mail: [anna.trzeciak@chem.uni.wroc.pl](mailto:anna.trzeciak@chem.uni.wroc.pl)

#### 1. Synthesis of palladium complexes

Imidazole ( $2 \times 10^{-3}$  mol) and  $\text{CH}_3\text{CN}$  (10 mL) were added to  $\text{PdCl}_2(\text{cod})$  ( $1 \times 10^{-3}$  mol), and the solution was heated for 2.5 h at 70 °C. After cooling down to ambient temperature, the solution was concentrated in *vacuo*. The product was filtered off, washed with  $\text{CH}_3\text{CN}$ ,  $\text{Et}_2\text{O}$ , and dried in *vacuo*.

$\text{Pd}(\text{1-MI})_2\text{Cl}_2$  (Yield: 80%)

Anal. Calc. for  $\text{C}_8\text{H}_{12}\text{N}_4\text{Cl}_2\text{Pd}$ : C 28.13; H 3.54; N 16.40. Found: C 27.99; H 3.51; N 16.34.

$^1\text{H}$  NMR (500 MHz,  $\text{CDCl}_3$ ):  $\delta$  (ppm): 3.66 (3H, s,  $\text{NCH}_3$ ); 6.74 (1H d,  $J_{\text{H-H}} = 1.7$  Hz, CH); 7.38 (1H d,  $J_{\text{H-H}} = 1.7$  Hz, CH); 7.95 (1H, s,  $\text{N}_2\text{CH}$ ).  $^{13}\text{C}$  NMR (125 MHz,  $\text{CDCl}_3$ ):  $\delta$  (ppm): 34.6 ( $\text{NCH}_3$ ); 119.6 (CH); 130.4 (CH), 139.4 ( $\text{N}_2\text{C}$ ).

$\text{Pd}(\text{1-BI})_2\text{Cl}_2$  (Yield: 65%)

Anal. Calc. for  $\text{C}_{14}\text{H}_{24}\text{N}_4\text{Cl}_2\text{Pd}$ : C 39.50; H 5.68; N 13.16. Found: C 39.75; H 5.69; N 13.12.

$^1\text{H}$  NMR (500 MHz,  $\text{CDCl}_3$ ):  $\delta$  (ppm): 0.92 ppm (3H, t,  $J_{\text{H-H}} = 7.4$  Hz,  $\text{CH}_3$ ); 1.30 ppm (2H, sx,  $J_{\text{H-H}} = 7.4$  Hz,  $\text{CH}_2$ ); 1.72 (2H, q,  $J_{\text{H-H}} = 7.4$  Hz,  $\text{CH}_2$ ), 3.87 (2H, t,  $J_{\text{H-H}} = 7.4$  Hz,  $\text{NCH}_2$ ); 6.75 (1H, s, CH); 7.38 (1H, s, CH); 7.97 (1H, s, CH).  $^{13}\text{C}$  NMR (125 MHz,  $\text{CDCl}_3$ ):  $\delta$  (ppm): 13.4 ( $\text{CH}_3$ ); 19.6 ( $\text{CH}_2$ ); 32.5 ( $\text{CH}_2$ ); 48.1 ( $\text{N-CH}_2$ ); 118.3 (CH); 130.2 (CH); 138.6 ( $\text{N}_2\text{C}$ ).

Table S1. Carbonylative Suzuki coupling of iodobenzene: testing solvent and base<sup>a</sup>

| Entry | Solvent         | Base                        | Conv. <sup>b</sup><br>(%) | <b>1</b> <sup>b</sup><br>(%) | <b>2</b> <sup>b</sup><br>(%) | Selectivity to <b>1</b><br>(%) |
|-------|-----------------|-----------------------------|---------------------------|------------------------------|------------------------------|--------------------------------|
| 1     | IPA:water (1:1) | KOH                         | 96                        | 25                           | 70                           | 26                             |
| 2     | IPA:water (1:1) | $\text{K}_2\text{CO}_3$     | 85                        | 60                           | 20                           | 71                             |
| 3     | IPA:water (1:1) | $\text{CsCO}_3$             | 68                        | 22                           | 46                           | 32                             |
| 4     | IPA:water (1:1) | $\text{KH}_2\text{PO}_4$    | 2                         | 1                            | 1                            | 50                             |
| 5     | IPA:water (1:1) | $\text{NEt}_3$              | 98                        | 38                           | 3                            | 39                             |
| 6     | IPA:water (1:1) | $\text{NEt}(\text{i-Pr})_2$ | 100                       | 51                           | 27                           | 51                             |
| 7     | Anisole         | $\text{K}_2\text{CO}_3$     | 53                        | 52                           | 1                            | 99                             |
| 8     | Ethylene glycol | $\text{K}_2\text{CO}_3$     | 87                        | 1                            | 86                           | 1                              |
| 9     | THF             | $\text{K}_2\text{CO}_3$     | 20                        | 20                           | 0                            | 100                            |

|    |         |                                 |    |    |    |     |
|----|---------|---------------------------------|----|----|----|-----|
| 10 | Dioxane | K <sub>2</sub> CO <sub>3</sub>  | 44 | 44 | 0  | 100 |
| 11 | Ethanol | K <sub>2</sub> CO <sub>3</sub>  | 71 | 43 | 21 | 61  |
| 12 | Water   | NEt <sub>3</sub>                | 43 | 42 | 1  | 98  |
| 13 | Water   | K <sub>2</sub> CO <sub>3</sub>  | 56 | 52 | 4  | 93  |
| 14 | Water   | Na <sub>2</sub> CO <sub>3</sub> | 68 | 65 | 3  | 96  |

<sup>a</sup> Pd(1-MI)<sub>2</sub>Cl<sub>2</sub> (1 mol %), base (3 mmol), solvent (5 mL), iodobenzene (1 mmol), phenyl boronic acid (1.2 mmol), CO (1atm), 60°C, 2h.

<sup>b</sup> Conversions were determined by GC using mesitylene as internal standard.

IPA = 2-propanol

Structural data of diarylketones (references S1 – S19)

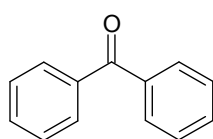

**Benzophenone:** <sup>1</sup>H NMR (500 MHz, CDCl<sub>3</sub>): δ 7.80-7.77 (m, 4H), 7.58-7.55 (m, 2H), 7.48-7.44 (m, 4H). <sup>13</sup>C NMR (125 MHz, CDCl<sub>3</sub>): δ 196.9, 137.7, 132.6, 130.2, 128.4. GC-MS: m/z = 51 (11%), 77 (42%), 105 (100%), 182 ([M<sup>+</sup>] = 42%).

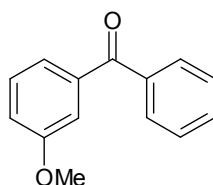

**3-Methoxybenzophenone:** <sup>1</sup>H NMR (500 MHz, CDCl<sub>3</sub>): δ 7.79-7.78 (m, 2H), 7.58-7.55 (m, 1H), 7.47-7.44 (m, 2H), 7.37-7.31 (m, 3H), 7.11 (ddd, *J*<sub>H-H</sub> = 7.8 Hz, 2.7 Hz, 1.5 Hz, 1H), 3.85 (s, 3H). <sup>13</sup>C NMR (125 MHz, CDCl<sub>3</sub>): δ 196.7, 159.8, 139.1, 137.8, 132.6, 130.2, 129.4, 128.5, 123.1, 119.1, 114.5, 55.7. GC-MS: m/z = 51 (36%), 64 (21%), 77 (82%), 105 (96%), 135 (100%), 181 (18%), 212 ([M<sup>+</sup>] = 82%).

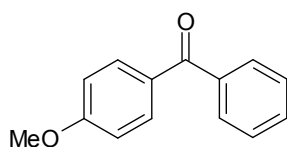

**4-Methoxybenzophenone:** <sup>1</sup>H NMR (500 MHz, CDCl<sub>3</sub>): δ 7.81 (m, 2H), 7.74-7.72 (m, 2H), 7.54 (t, *J*<sub>H-H</sub> = 7.4 Hz, 1H), 7.45 (t, *J*<sub>H-H</sub> = 7.4 Hz, 2H), 6.96-6.93 (m, 2H), 3.87 (s, 3H). <sup>13</sup>C NMR (125 MHz, CDCl<sub>3</sub>): δ 195.7, 163.4, 138.5, 132.7, 132.1, 130.4, 129.9, 128.4, 113.7, 55.7. GC-MS: m/z = 51 (25%), 64 (18%), 77 (89%), 105 (36%), 135 (100%), 212 ([M<sup>+</sup>] = 82%).

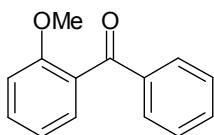

**2-Methoxybenzophenone:**  $^1\text{H}$  NMR (500 MHz,  $\text{CDCl}_3$ ):  $\delta$  7.80-7.78 (m, 2H), 7.54-7.51 (m, 1H), 7.47-7.39 (m, 3H), 7.34 (dd,  $J_{\text{H-H}} = 7.4$  Hz, 1.7 Hz, 1H), 7.02 (td,  $J_{\text{H-H}} = 7.5$  Hz, 0.9 Hz, 1H), 6.98 (d,  $J_{\text{H-H}} = 8.4$  Hz, 1H).  $^{13}\text{C}$  NMR (125 MHz,  $\text{CDCl}_3$ ):  $\delta$  196.6, 157.5, 138.0, 133.1, 132.0, 130.0, 129.8, 129.1, 128.4, 120.7, 111.7, 55.8. GC-MS:  $m/z = 51$  (36%), 64 (21%), 77 (82%), 105 (96%), 135 (100%), 181 (18%), 212 ( $[\text{M}^+] = 82\%$ ).

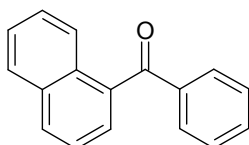

**1-Naphthyl phenylketone:**  $^1\text{H}$  NMR (500 MHz,  $\text{CDCl}_3$ ):  $\delta$  8.09 (d,  $J_{\text{H-H}} = 8.2$  Hz, 1H), 7.99 (d,  $J_{\text{H-H}} = 8.2$  Hz, 1H), 7.91 (d,  $J_{\text{H-H}} = 8.2$  Hz, 1H), 7.86 (d,  $J_{\text{H-H}} = 7.8$  Hz, 2H), 7.60-7.56 (m, 2H), 7.53-7.47 (m, 3H), 7.44 (t,  $J_{\text{H-H}} = 7.8$  Hz, 2H).  $^{13}\text{C}$  NMR (125 MHz,  $\text{CDCl}_3$ ):  $\delta$  198.2, 138.5, 136.5, 133.9, 133.4, 131.4, 131.1, 130.6, 128.6, 127.9, 127.4, 126.6, 125.9, 124.5. GC-MS:  $m/z = 51$  (25%), 77 (75%), 105 (71%), 127 (79%), 155 (100%), 232 ( $[\text{M}^+] = 97\%$ ). Spectral data are consistent with data reported in the literature. [ j, s, k]

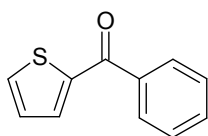

**2-Benzoylthiophene:**  $^1\text{H}$  NMR (500 MHz,  $\text{CDCl}_3$ ):  $\delta$  7.86-7.83 (m, 2H), 7.70 (dd,  $J_{\text{H-H}} = 4.9$  Hz, 1.1 Hz, 1H), 7.63 (dd,  $J_{\text{H-H}} = 3.8$  Hz, 1.1 Hz, 1H), 7.59-7.56 (m, 1H), 7.49-7.46 (m, 2H), 7.14 (dd,  $J_{\text{H-H}} = 4.9$  Hz, 3.8 Hz, 1H).  $^{13}\text{C}$  NMR (125 MHz,  $\text{CDCl}_3$ ):  $\delta$  188.4, 143.9, 138.4, 135.0, 134.4, 132.5, 129.4, 128.6, 128.2. GC-MS:  $m/z = 39$  (21%), 51 (21%), 77 (43%), 111 (100%), 188 ( $[\text{M}^+] = 61\%$ ).

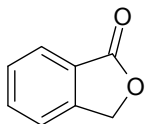

**1-Phthalanone:**  $^1\text{H}$  NMR (500 MHz,  $\text{CDCl}_3$ ):  $\delta$  7.91 (d,  $J_{\text{H-H}} = 7.7$  Hz, 1H), 7.67 (dt,  $J_{\text{H-H}} = 7.5$  Hz, 1.0 Hz, 1H), 7.51 (t,  $J_{\text{H-H}} = 7.5$  Hz, 1H), 7.47 (dt,  $J_{\text{H-H}} = 7.7$  Hz, 0.8 Hz, 1H), 5.31 (s, 2H).  $^{13}\text{C}$  NMR (125 MHz,  $\text{CDCl}_3$ ):  $\delta$  171.3, 146.7, 134.2, 129.2, 126.0, 125.9, 122.3, 69.8. GC-MS:  $m/z = 51$  (19%), 77 (53%), 105 (100%), 134 ( $[\text{M}^+] = 34\%$ ).

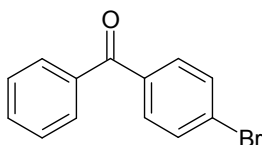

**4-Bromobenzophenone:**  $^1\text{H}$  NMR (500 MHz,  $\text{CDCl}_3$ ):  $\delta$  7.76-7.74 (m, 2H), 7.67-7.56 (m, 5H), 7.49-7.45 (m, 2H).  $^{13}\text{C}$  NMR (125 MHz,  $\text{CDCl}_3$ ):  $\delta$  195.8, 137.4, 136.5, 132.9, 131.8, 131.7, 130.1, 128.6, 127.7. GC-MS:  $m/z$  = 51 (21%), 77 (49%), 105 (100%), 155 (11%), 183 (32%), 260 and 262 ( $[\text{M}^+] = 19\%$ ).

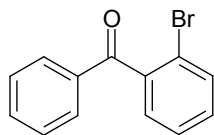

**2-Bromobenzophenone:**  $^1\text{H}$  NMR (500 MHz,  $\text{CDCl}_3$ ):  $\delta$  7.80-7.78 (m, 2H), 7.62 (d,  $J_{\text{H-H}} = 8.0$  Hz, 1H), 7.58 (t,  $J_{\text{H-H}} = 7.4$  Hz, 1H), 7.44 (t,  $J_{\text{H-H}} = 7.8$  Hz, 2H), 7.41-7.38 (m, 1H), 7.35-7.32 (m, 2H).  $^{13}\text{C}$  NMR (125 MHz,  $\text{CDCl}_3$ ):  $\delta$  196.0, 140.9, 136.3, 133.9, 133.4, 131.3, 130.4, 129.2, 128.8, 127.4, 119.7. GC-MS:  $m/z$  = 51 (29%), 77 (75%), 105 (100%), 155 (11%), 183 (28%), 260 and 262 ( $[\text{M}^+] = 28\%$ ).

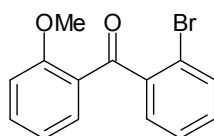

**2-Bromo-2'-methoxybenzophenone:**  $^1\text{H}$  NMR (500 MHz,  $\text{CDCl}_3$ ):  $\delta$  7.64 (dd,  $J_{\text{H-H}} = 7.7$  Hz, 1.8 Hz, 1H), 7.56 (d,  $J_{\text{H-H}} = 7.6$  Hz, 1H), 7.51-7.47 (m, 1H), 7.35-7.24 (m, 3H), 7.00 (t,  $J_{\text{H-H}} = 7.5$  Hz, 1H), 6.91 (d,  $J_{\text{H-H}} = 8.3$  Hz, 1H), 3.63 (s, 3H).  $^{13}\text{C}$  NMR (125 MHz,  $\text{CDCl}_3$ ):  $\delta$  195.4, 159.5, 142.9, 134.6, 133.2, 131.9, 131.1, 129.5, 127.4, 127.2, 120.9, 119.6, 112.2, 56.0. GC-MS:  $m/z$  = 50 (11%), 63 (7%), 77 (39%), 92 (14%), 121 (14%), 135 (100%), 155 (11%), 183 (14%), 211 (25%), 290 and 292 ( $[\text{M}^+] = 11\%$ ).

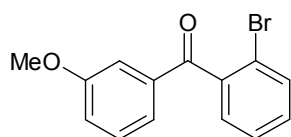

**2-Bromo-3'-methoxybenzophenone:**  $^1\text{H}$  NMR (500 MHz,  $\text{CDCl}_3$ ):  $\delta$  7.62 (d,  $J_{\text{H-H}} = 8.0$  Hz, 1H), 7.43-7.37 (m, 2H), 7.33 (t,  $J_{\text{H-H}} = 7.8$  Hz, 3H), 7.27-7.25 (m, 1H), 7.13 (dd,  $J_{\text{H-H}} = 8.2$  Hz, 2.3 Hz, 1H).  $^{13}\text{C}$  NMR (125 MHz,  $\text{CDCl}_3$ ):  $\delta$  195.8, 160.1, 140.9, 137.7, 133.4, 131.3, 129.8, 129.1, 127.3, 123.7, 120.7, 119.7, 113.9, 22.7. GC-MS:  $m/z$  = 50 (8%), 64 (17%), 77 (35%), 92 (21%), 107 (33%), 135 (100%), 154 (19%), 183 (33%), 211 (96%), 290 and 292 ( $[\text{M}^+] = 23\%$ ). Spectral data are consistent with data reported in the literature. [d]

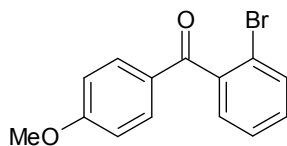

**2-Bromo-4'-methoxybenzophenone:**  $^1\text{H}$  NMR (500 MHz,  $\text{CDCl}_3$ ):  $\delta$  7.76 (d,  $J_{\text{H-H}} = 9.0$  Hz, 2H), 7.62-7.60 (m, 1H), 7.40-7.36 (m, 1H), 7.33-7.29 (m, 2H), 6.91 (d,  $J_{\text{H-H}} = 9.0$  Hz, 2H), 3.85 (s, 3H).  $^{13}\text{C}$  NMR (125 MHz,  $\text{CDCl}_3$ ):  $\delta$  194.6, 164.3, 141.3, 133.3, 132.8, 131.0, 129.3, 128.9, 127.4, 119.6, 114.1, 55.7. GC-MS:  $m/z = 77$  (18%), 92 (11%), 135 (100%), 290 and 292 ( $[\text{M}^+] = 18\%$ ).

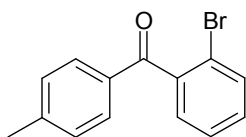

**2-Bromo-4'-methylbenzophenone:**  $^1\text{H}$  NMR (500 MHz,  $\text{CDCl}_3$ ):  $\delta$  7.69 (d,  $J_{\text{H-H}} = 8.2$  Hz, 2H), 7.62-7.60 (m, 1H), 7.38 (dt,  $J_{\text{H-H}} = 7.6$  Hz, 1.1 Hz, 1H), 7.33-7.29 (m, 2H), 7.25 (d,  $J_{\text{H-H}} = 7.9$  Hz, 2H), 2.40 (s, 3H).  $^{13}\text{C}$  NMR (125 MHz,  $\text{CDCl}_3$ ):  $\delta$  195.7, 145.0, 141.1, 133.8, 133.3, 131.1, 130.5, 129.5, 129.0, 127.3, 119.6, 22.0. GC-MS:  $m/z = 65$  (12%), 91 (36%), 119 (100%), 183 (6%), 274 and 276 ( $[\text{M}^+] = 36\%$ ).

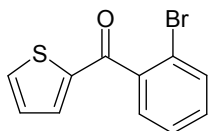

**2-(2-Bromobenzoyl)thiophene:**  $^1\text{H}$  NMR (500 MHz,  $\text{CDCl}_3$ ):  $\delta$  7.74 (dd,  $J_{\text{H-H}} = 4.9$  Hz, 1.1 Hz, 1H), 7.63 (d,  $J_{\text{H-H}} = 8.1$  Hz, 1H), 7.41-7.31 (m, 4H), 7.10 (dd,  $J_{\text{H-H}} = 4.9$  Hz, 3.8 Hz, 1H).  $^{13}\text{C}$  NMR (125 MHz,  $\text{CDCl}_3$ ):  $\delta$  188.0, 143.6, 140.6, 136.2, 135.9, 133.6, 131.5, 128.9, 128.5, 127.3, 119.6. GC-MS:  $m/z = 39$  (18%), 111 (100%), 154 (7%), 187 (11%), 266 and 268 ( $[\text{M}^+] = 14\%$ ).

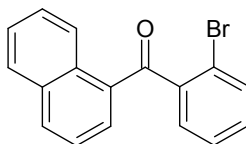

**2-bromophenyl-1-naphthylketone:**  $^1\text{H}$  NMR (500 MHz,  $\text{CDCl}_3$ ):  $\delta$  8.90 (d,  $J_{\text{H-H}} = 8.6$  Hz, 1H), 8.02 (d,  $J_{\text{H-H}} = 8.2$  Hz, 1H), 7.90 (d,  $J_{\text{H-H}} = 8.2$  Hz, 1H), 7.67-7.62 (m, 2H), 7.58-7.55 (m, 2H), 7.46 (dd,  $J_{\text{H-H}} = 7.5$  Hz, 1.7 Hz, 1H), 7.42-7.38 (m, 2H), 7.34 (dt,  $J_{\text{H-H}} = 7.6$  Hz, 1.7 Hz, 1H).  $^{13}\text{C}$  NMR (125 MHz,  $\text{CDCl}_3$ ):  $\delta$  197.9, 142.2, 134.2, 134.1, 134.0, 133.6, 132.4, 131.7, 131.3, 130.2, 128.7, 128.6, 127.4, 126.9, 126.3, 124.5, 120.6. GC-MS:  $m/z = 50$  (7%), 75 (18%), 101 (29%), 127 (78%), 155 (96%), 183 (14%), 202 (14%), 231 (100%), 310 and 312 ( $[\text{M}^+] = 25\%$ ).

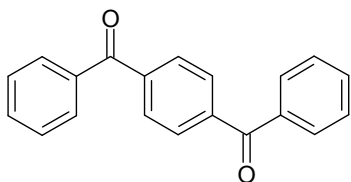

**1,4-Phenylenebis(phenyl)methanone:**  $^1\text{H}$  NMR (500 MHz,  $\text{CDCl}_3$ ):  $\delta$  7.87 (s, 4H), 7.84-7.82 (m, 4H), 7.63-7.59 (m, 2H), 7.50 (t,  $J_{\text{H-H}} = 7.7$  Hz, 4H).  $^{13}\text{C}$  NMR (125 MHz,  $\text{CDCl}_3$ ):  $\delta$  196.2, 140.9, 137.2, 133.2, 130.3, 130.0, 128.7. GC-MS:  $m/z = 77$  (48%), 105 (100%), 152 (8%), 181 (10%), 209 (48%) 286 ( $[\text{M}^+] = 36\%$ ).

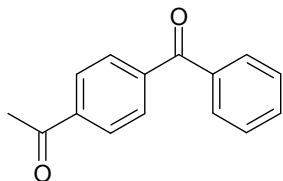

**4-Acetylbenzophenone:**  $^1\text{H}$  NMR (500 MHz,  $\text{CDCl}_3$ ):  $\delta$  8.04 (d,  $J_{\text{H-H}} = 8.5$  Hz, 2H), 7.84 (d,  $J_{\text{H-H}} = 8.5$  Hz, 2H), 7.79-7.77 (m, 2H), 7.60 (t,  $J_{\text{H-H}} = 7.5$  Hz, 1H), 7.48 (t,  $J_{\text{H-H}} = 7.8$  Hz, 2H), 2.65 (s, 3H).  $^{13}\text{C}$  NMR (125 MHz,  $\text{CDCl}_3$ ):  $\delta$  197.7, 196.1, 141.5, 139.8 137.1, 133.2, 130.3, 130.2, 128.7, 128.4, 27.1. GC-MS:  $m/z = 43$  (28%), 51 (25%), 77 (75%), 105 (100%), 147 (36%), 209 (93%), 224 ( $[\text{M}^+] = 54\%$ ).

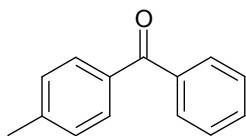

**4-Methylbenzophenone:**  $^1\text{H}$  NMR (500 MHz,  $\text{CDCl}_3$ ):  $\delta$  7.77-7.75 (m, 2H), 7.70 (d,  $J_{\text{H-H}} = 8.2$  Hz, 2H), 7.57-7.54 (m, 1H), 7.47-7.44 (m, 2H), 7.26 (d,  $J_{\text{H-H}} = 7.9$  Hz, 2H), 2.43 (s, 3H).  $^{13}\text{C}$  NMR (125 MHz,  $\text{CDCl}_3$ ):  $\delta$  196.7, 143.4, 138.2, 135.1, 132.4, 130.5, 130.1, 129.2, 128.4, 21.86. GC-MS:  $m/z = 39$  (11%), 51 (21%), 77 (50%), 91 (54%), 105 (57%), 119 (100%), 181 (14%), 196 ( $[\text{M}^+] = 64\%$ ).

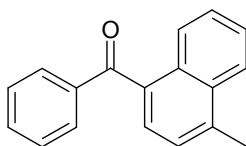

**(4-methylnaphthalen-1-yl)(phenyl)methanone:**  $^1\text{H}$  NMR (500 MHz,  $\text{CDCl}_3$ ):  $\delta$  8.15 (d,  $J_{\text{H-H}} = 8.3$  Hz, 1H), 8.07 (d,  $J_{\text{H-H}} = 8.3$  Hz, 1H), 7.85-7.83 (m, 2H), 7.58-7.54 (m, 2H), 7.51-7.42 (m, 4H), 7.34 (d,  $J_{\text{H-H}} = 7.2$  Hz, 1H), 2.76 (s, 3H).  $^{13}\text{C}$  NMR (125 MHz,  $\text{CDCl}_3$ ):  $\delta$  198.3, 138.9, 138.5, 134.9, 133.2, 133.1, 131.3, 130.6, 128.6, 128.2, 127.1, 126.6, 126.5, 125.3, 124.6, 20.1. GC-

MS:  $m/z = 51$  (12%), 77 (44%), 105 (25%), 115 (33%), 141 (37%), 169 (100%), 231 (23%), 246 ( $[M^+] = 60\%$ ).

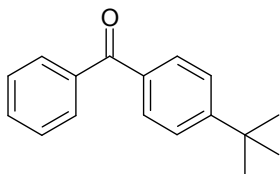

**4-tert-Butylbenzophenone:**  $^1\text{H NMR}$  (500 MHz,  $\text{CDCl}_3$ ):  $\delta$  7.79-7.73 (m, 4H), 7.57-7.54 (m, 1H), 7.49-7.44 (m, 4H), 1.35 (s, 9H).  $^{13}\text{C NMR}$  (125 MHz,  $\text{CDCl}_3$ ):  $\delta$  196.7, 156.4, 138.2, 135.0, 132.4, 130.3, 130.2, 128.4, 125.4, 35.3, 31.4. GC-MS:  $m/z = 51$  (11%), 77 (46%), 105 (68%), 161 (14%), 223 (100%), 238 ( $[M^+] = 39\%$ ).

Structural data of benzoate esters (references S20 – S25)

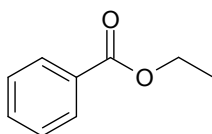

**Ethyl benzoate:**  $^1\text{H NMR}$  (500 MHz,  $\text{CDCl}_3$ ):  $\delta$  8.04-8.02 (m, 2H), 7.55-7.51 (m, 1H), 7.43-7.40 (m, 2H), 4.36 (q,  $J = 7.2$  Hz, 2H), 1.38 (t,  $J = 7.1$  Hz, 3H).  $^{13}\text{C NMR}$  (125 MHz,  $\text{CDCl}_3$ ):  $\delta$  166.8, 133.0, 130.7, 129.7, 128.5, 61.1, 14.5. GC-MS:  $m/z = 51$  (18%), 77 (49%), 105 (100%), 122 (33%), 150 ( $[M^+] = 24\%$ ).

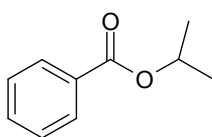

**Propyl benzoate:**  $^1\text{H NMR}$  (500 MHz,  $\text{CDCl}_3$ ):  $\delta$  8.01 (d,  $J = 7.2$  Hz, 2H), 7.53-7.51 (m, 1H), 7.45-7.40 (m, 2H), 5.23 (sept,  $J = 6.3$  Hz, 1H), 1.35 (d,  $J = 6.3$  Hz, 6H).  $^{13}\text{C NMR}$  (125 MHz,  $\text{CDCl}_3$ ):  $\delta$  166.3, 132.9, 131.1, 129.7, 128.5, 68.5, 22.1. GC-MS:  $m/z = 51$  (17%), 59 (20%), 77 (32%), 105 (100%), 123 (35%), 164 ( $[M^+] = 14\%$ ).

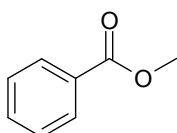

**Methyl benzoate:** <sup>1</sup>H NMR (500 MHz, CDCl<sub>3</sub>): δ 8.03-8.01 (m, 2H), 7.55-7.51 (m, 1H), 7.43-7.40 (m, 2H), 3.90 (s, 3H). <sup>13</sup>C NMR (125 MHz, CDCl<sub>3</sub>): δ 167.3, 133.1, 130.4, 129.8, 128.5, 52.3. GC-MS: m/z = 51 (24%), 77 (63%), 105 (100%), 136 (30%).

#### References:

- S1. H. A. Reisch, V. Enkelmann, U. Scherf, *J. Org. Chem.*, **64**, 1999, 655-658.  
S2. T. J. Korn, P. Knochel, *Angew. Chem. Int. Ed.*, **44**, 2005, 2947-2951.  
S3. A. T. Biju, F. Glorius, *Angew. Chem. Int. Ed.*, **49**, 2010, 9761-9764.  
S4. J. N. Moorthy, S. Samanta, *J. Org. Chem.*, **72**, 2007, 9786-9789.  
S5. K. Kunchithapatham, Ch. C. Eichman, J. P. Stambuli, *Chem. Commun.*, **47**, 2011, 12679-12681.  
S6. I. Sapountzis, W. Lin, Ch. C. Kofink, Ch. Despotopoulou, P. Knochel, *Angew. Chem. Int. Ed.*, **44**, 2005, 1654-1657.  
S7. T. Ishiyama, H. Kizaki, T. Hayashi, A. Suzuki, N. Miyaoura, *J. Org. Chem.*, **63**, 1998, 4726-4731.  
S8. M. V. Khedkar, T. Sasakib, B. M. Bhanage, *RSC Advances.*, **3**, 2013, 7791-7797.  
S9. M. V. Khedkar, P. J. Tambade, Z. S. Qureshi, B. M. Bhanage, *Eur. J. Org. Chem.*, 2010, 6981-6986.  
S10. D. Wang, Z. Zhang, *Org. Lett.*, **5**, 2003, 4645-4648.  
S11. S. Zhu, Z. Zhang, X. Huang, H. Jiang, Z. Guo, *Chem. Eur. J.*, **19**, 2013, 4695-4700.  
S12. P. J. Tambade, Y. P. Patil, A. G. Panda, B. M. Bhanage, *Eur. J. Org. Chem.*, 2009, 3022-3025.  
S13. H. Neumann, A. Brennführer, M. Beller, *Chem. Eur. J.*, **14**, 2008, 3645 - 3652.  
S14. T. Morimoto, M. Fujioka, K. Fuji, K. Tsutsumi, K. Kakiuchi, *J. Organomet. Chem.*, **692**, 2007, 625-634.  
S15. M. L. N. Rao, V. Venkatesh, D. Banerjee, *Tetrahedron*, **63**, 2007, 12917-12926.  
S16. M. J. Lo Fiego, M. A. Badajoz, G. F. Silbestri, M. T. Lockhart, A. B. Chopra, *J. Org. Chem.*, **73**, 2008, 9184-9187.  
S17. Z. Zheng, J. Wen, N. Wang, B. Wu, X. Yu, Beilstein *J. Org. Chem.*, **4**, 2008, 40.  
S18. L. J. Gooßen, F. Rudolphi, Ch. Oppel, N. Rodriguez, *Angew. Chem. Int. Ed.* **47**, 2008, 3043-3045.  
S19. S. Karagöz, D. K. Astley, S. T. Astley *Appl. Organomet. Chem.* **14**, 2000, 341-344.  
S20. J-J. Kim, Y-D. Park, D-H. Kweon, Y-J. Kang, H-K. Kim, S.-G. Lee, S-D. Cho, W-S. Lee, Y-J. Yoon, *Bull. Korean Chem. Soc.* **25**, 2004, 501-505.  
S21. Q. Liu, Y. Lan, J. Liu, G. Li, Y-D. Wu, A. Lei, *J. Am. Chem. Soc.* **131**, 2009, 10201-10210.  
S22. Ch. Salome, H. Kohn, *Tetrahedron* **65**, 2009, 456-460.  
S23. Y. Hu, J. Liu, Z. Lu, X. Luo, H. Zhang, Y. Lan, A. Lei, *J. Am. Chem. Soc.* **132**, 2010, 3153-3158.  
S24. M. Hosseini-Sarvari, E. Sodagar, *C. R. Chimie* **16**, 2013, 229-238.  
S25. A. Schmidt, T. Habeck, B. Snovydyovych, W. Eisfeld, *Org. Lett.*, **9**, 2007, 3515-3518.



SpinWorks 3: 1 H NMR Benzophenone

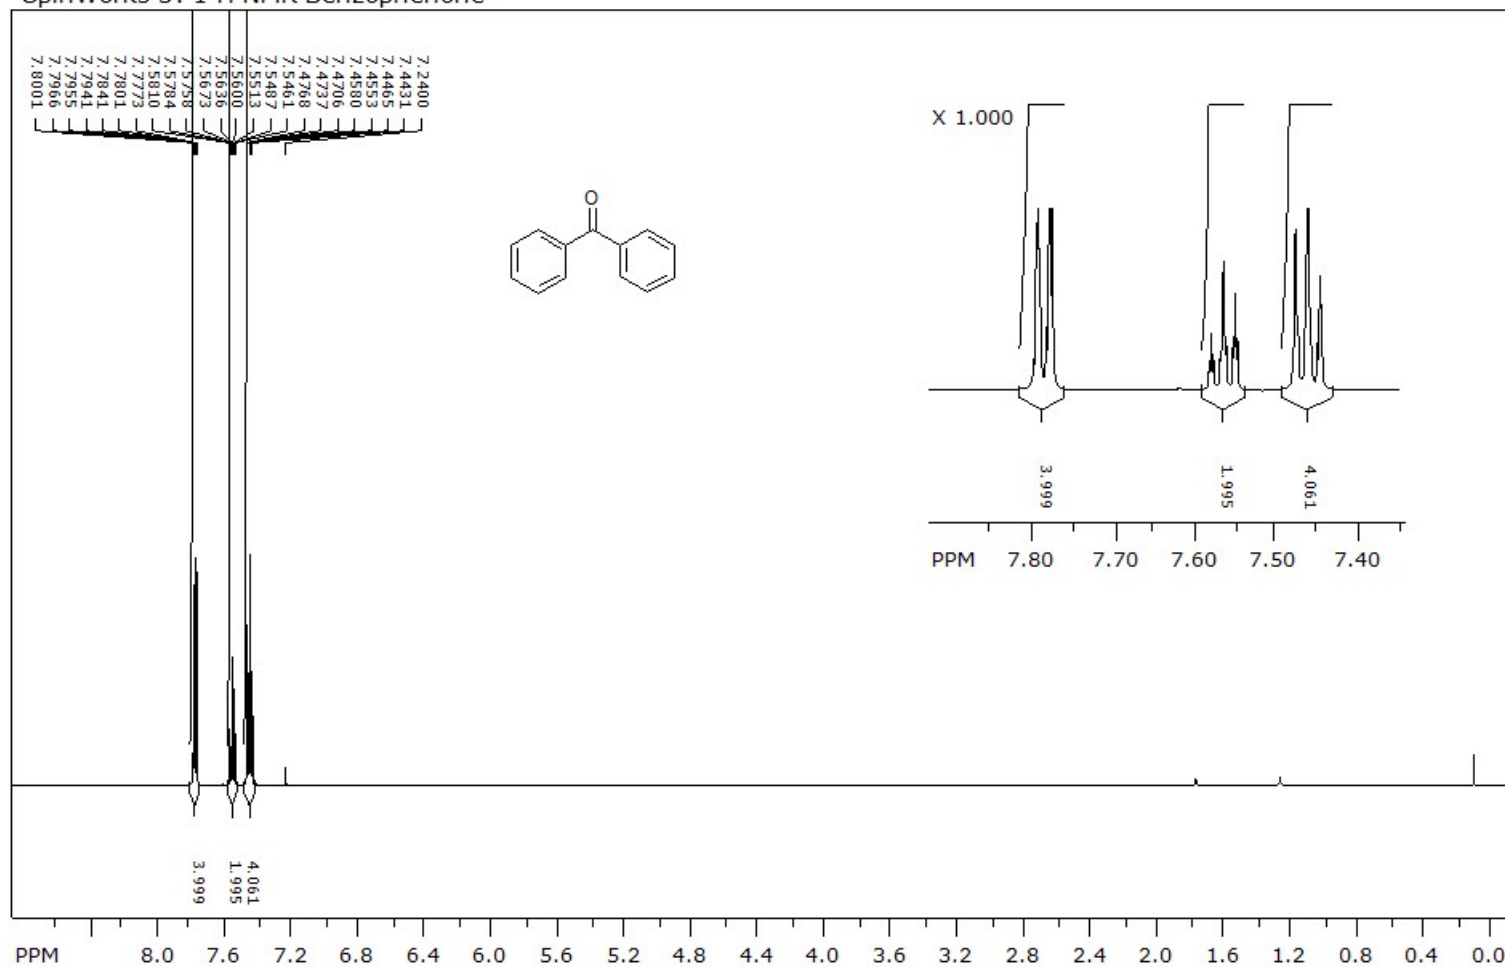

file: ...we ketony\PWM6669 benzofenon\1\fid exp: <zg30>  
 transmitter freq.: 500.133751 MHz  
 time domain size: 65536 points  
 width: 12500.00 Hz = 24.9933 ppm = 0.190735 Hz/pt  
 number of scans: 16

freq. of 0 ppm: 500.130023 MHz  
 processed size: 65536 complex points  
 LB: 0.300 GF: 0.0000  
 Hz/cm: 181.702 ppm/cm: 0.36331

SpinWorks 3: <sup>13</sup>C NMR Benzophenone

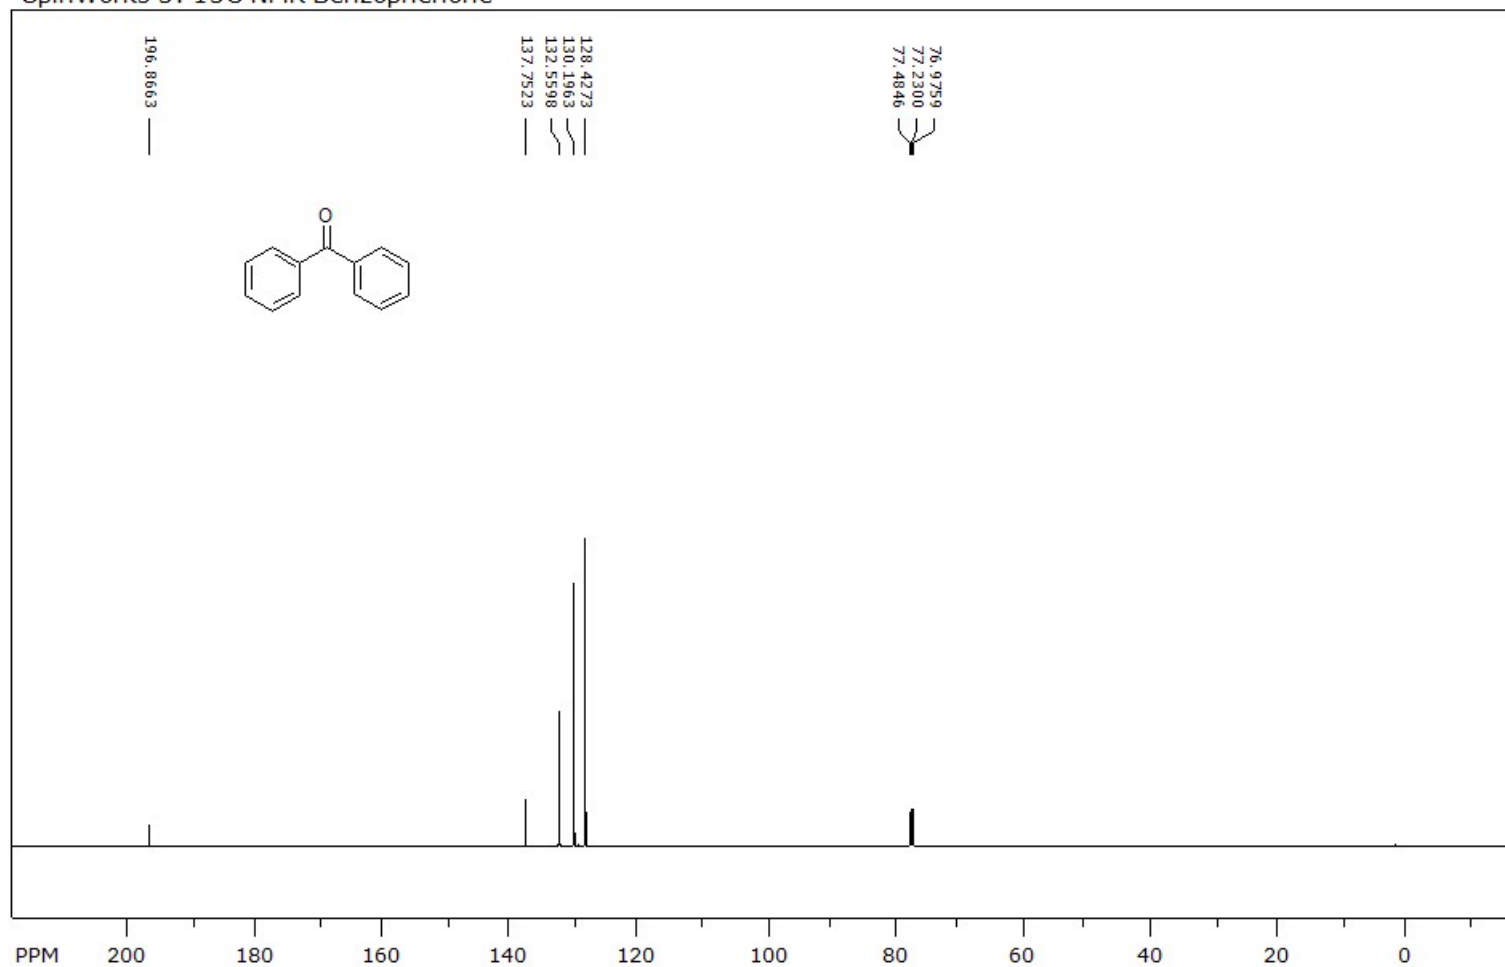

file: ...we ketony\PWM6669 benzofenon\2\fid expt: <zggg30>  
transmitter freq.: 125.770364 MHz  
time domain size: 65536 points  
width: 29761.90 Hz = 236.6369 ppm = 0.454131 Hz/pt  
number of scans: 4096

freq. of 0 ppm: 125.757772 MHz  
processed size: 32768 complex points  
LB: 1.000 GF: 0.0000  
Hz/cm: 1190.476 ppm/cm: 9.46547



SpinWorks 3: <sup>13</sup>C NMR 3-Methoxybenzophenone

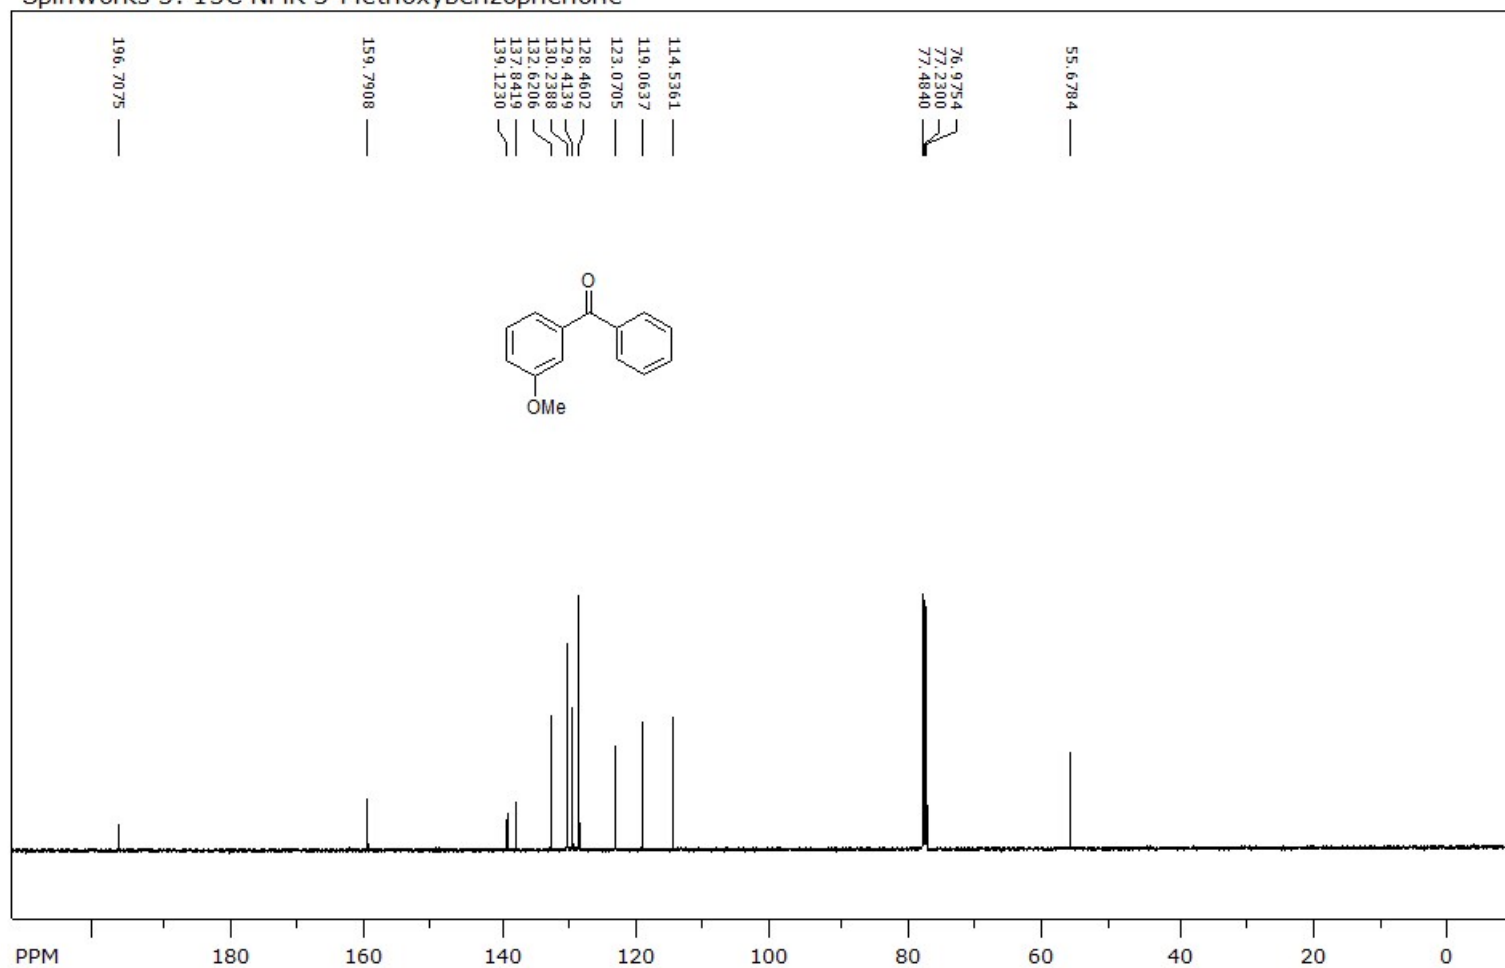

file: ...sers\Przemek\Desktop\PW6039A\2\fid expt: <zgpg30>  
 transmitter freq.: 125.770364 MHz  
 time domain size: 65536 points  
 width: 29761.90 Hz = 236.6369 ppm = 0.454131 Hz/pt  
 number of scans: 1024

freq. of 0 ppm: 125.757763 MHz  
 processed size: 32768 complex points  
 LB: 1.000 GF: 0.0000  
 Hz/cm: 1123.607 ppm/cm: 8.93380

SpinWorks 3: 1H NMR 4-Methoxybenzophenone

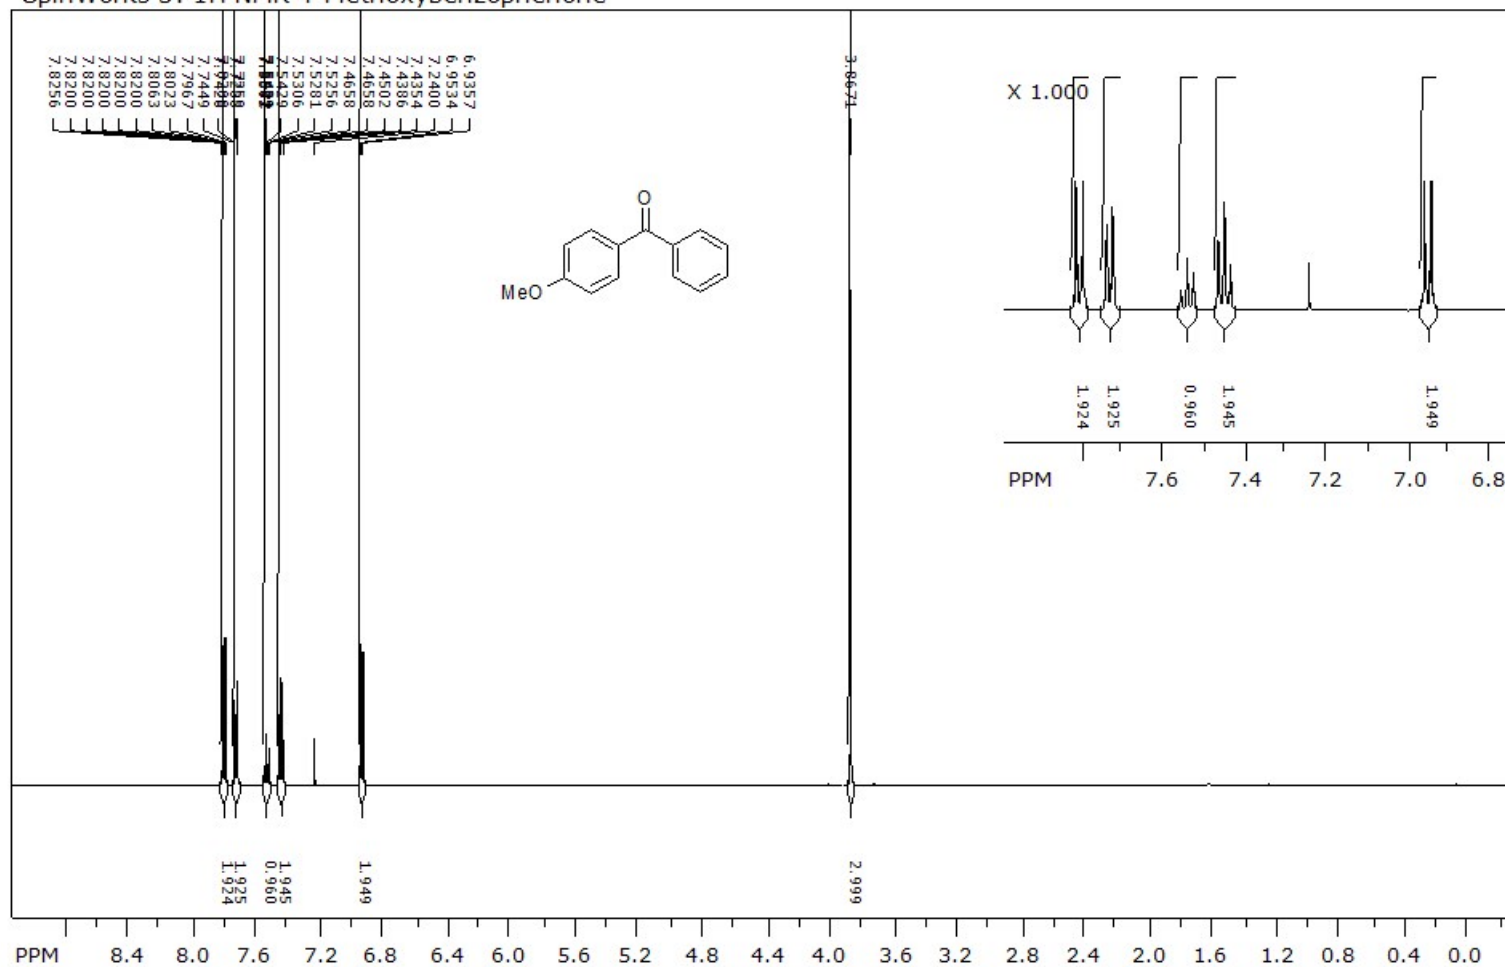

file: ...Users\Przemek\Desktop\PW6031\1\fid exp: <zg30>  
 transmitter freq.: 500.133751 MHz  
 time domain size: 65536 points  
 width: 12500.00 Hz = 24.9933 ppm = 0.190735 Hz/pt  
 number of scans: 16

freq. of 0 ppm: 500.130024 MHz  
 processed size: 65536 complex points  
 LB: 0.300 GF: 0.0000  
 Hz/cm: 189.787 ppm/cm: 0.37947

SpinWorks 3: <sup>13</sup>C NMR 4-Methoxybenzophenone

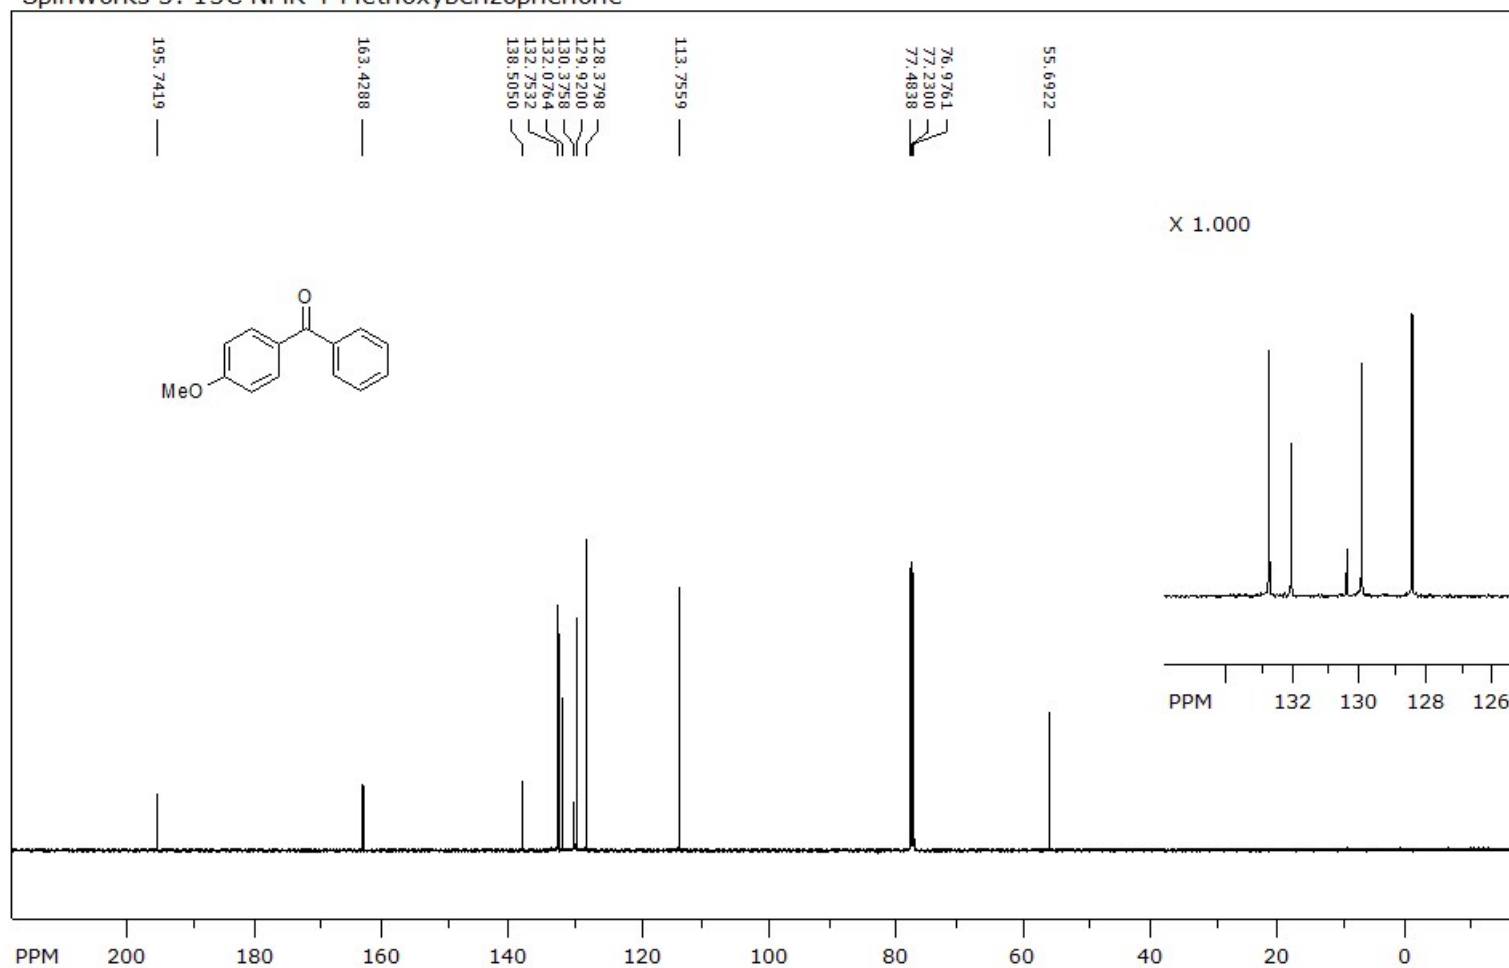

file: ...Users\Przemek\Desktop\PW6031\2\fid expt: <zgpg30>  
 transmitter freq.: 125.770364 MHz  
 time domain size: 65536 points  
 width: 29761.90 Hz = 236.6369 ppm = 0.454131 Hz/pt  
 number of scans: 1024

freq. of 0 ppm: 125.757764 MHz  
 processed size: 32768 complex points  
 LB: 1.000 GF: 0.0000  
 Hz/cm: 1190.476 ppm/cm: 9.46547

SpinWorks 3: 1H NMR 2-methoxybenzophenone

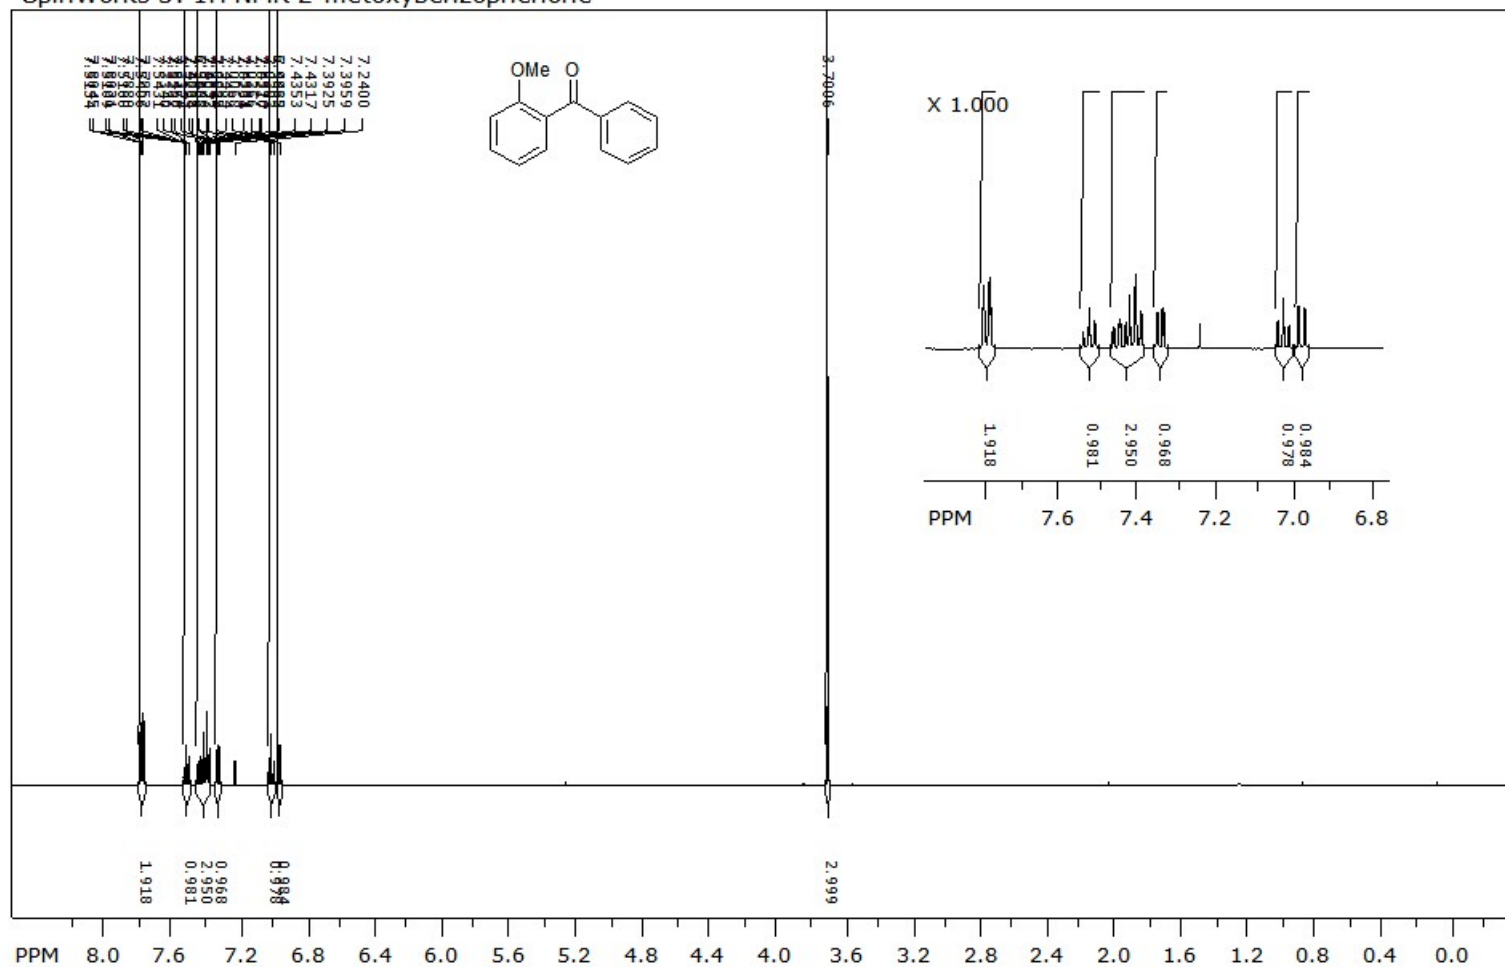

file: ...Users\Przemek\Desktop\PW6029\1\fid exp: <zg30>  
 transmitter freq.: 500.133751 MHz  
 time domain size: 65536 points  
 width: 12500.00 Hz = 24.9933 ppm = 0.190735 Hz/pt  
 number of scans: 16

freq. of 0 ppm: 500.130023 MHz  
 processed size: 65536 complex points  
 LB: 0.300 GF: 0.0000  
 Hz/cm: 180.000 ppm/cm: 0.35990

SpinWorks 3: <sup>13</sup>C NMR 2-methoxybenzophenone

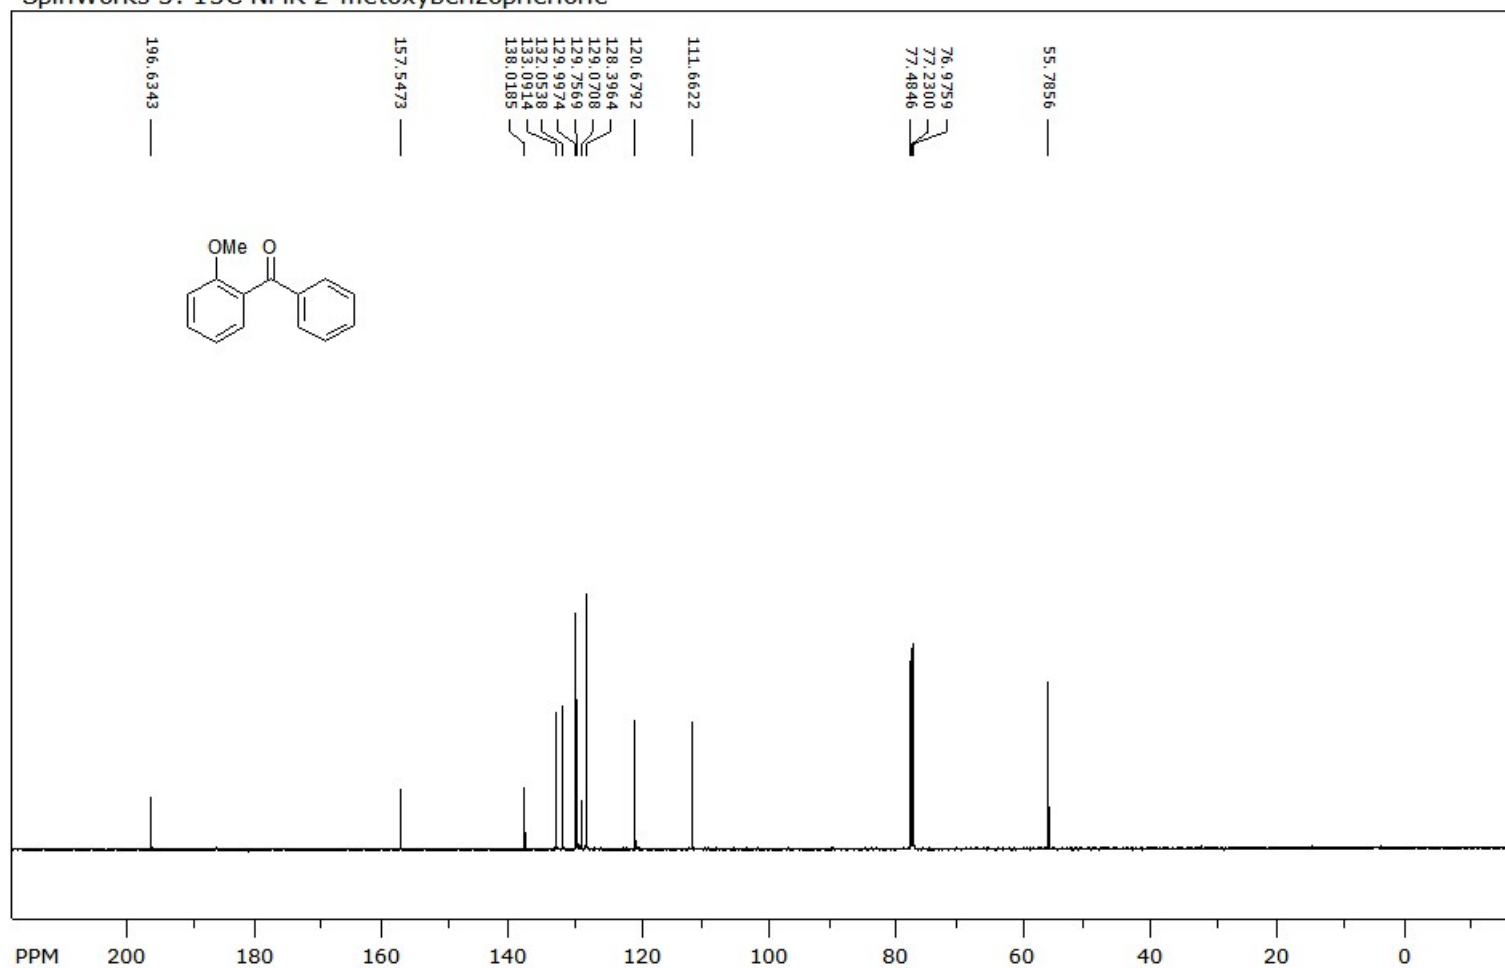

file: ...Users\Przemek\Desktop\PW6029\2\fid exp: <zggg30>  
 transmitter freq.: 125.770364 MHz  
 time domain size: 65536 points  
 width: 29761.90 Hz = 236.6369 ppm = 0.454131 Hz/pt  
 number of scans: 1024

freq. of 0 ppm: 125.757767 MHz  
 processed size: 32768 complex points  
 LB: 1.000 GF: 0.0000  
 Hz/cm: 1190.476 ppm/cm: 9.46547



SpinWorks 3: 1H NMR Naphthalen-1-yl(phenyl)methanone

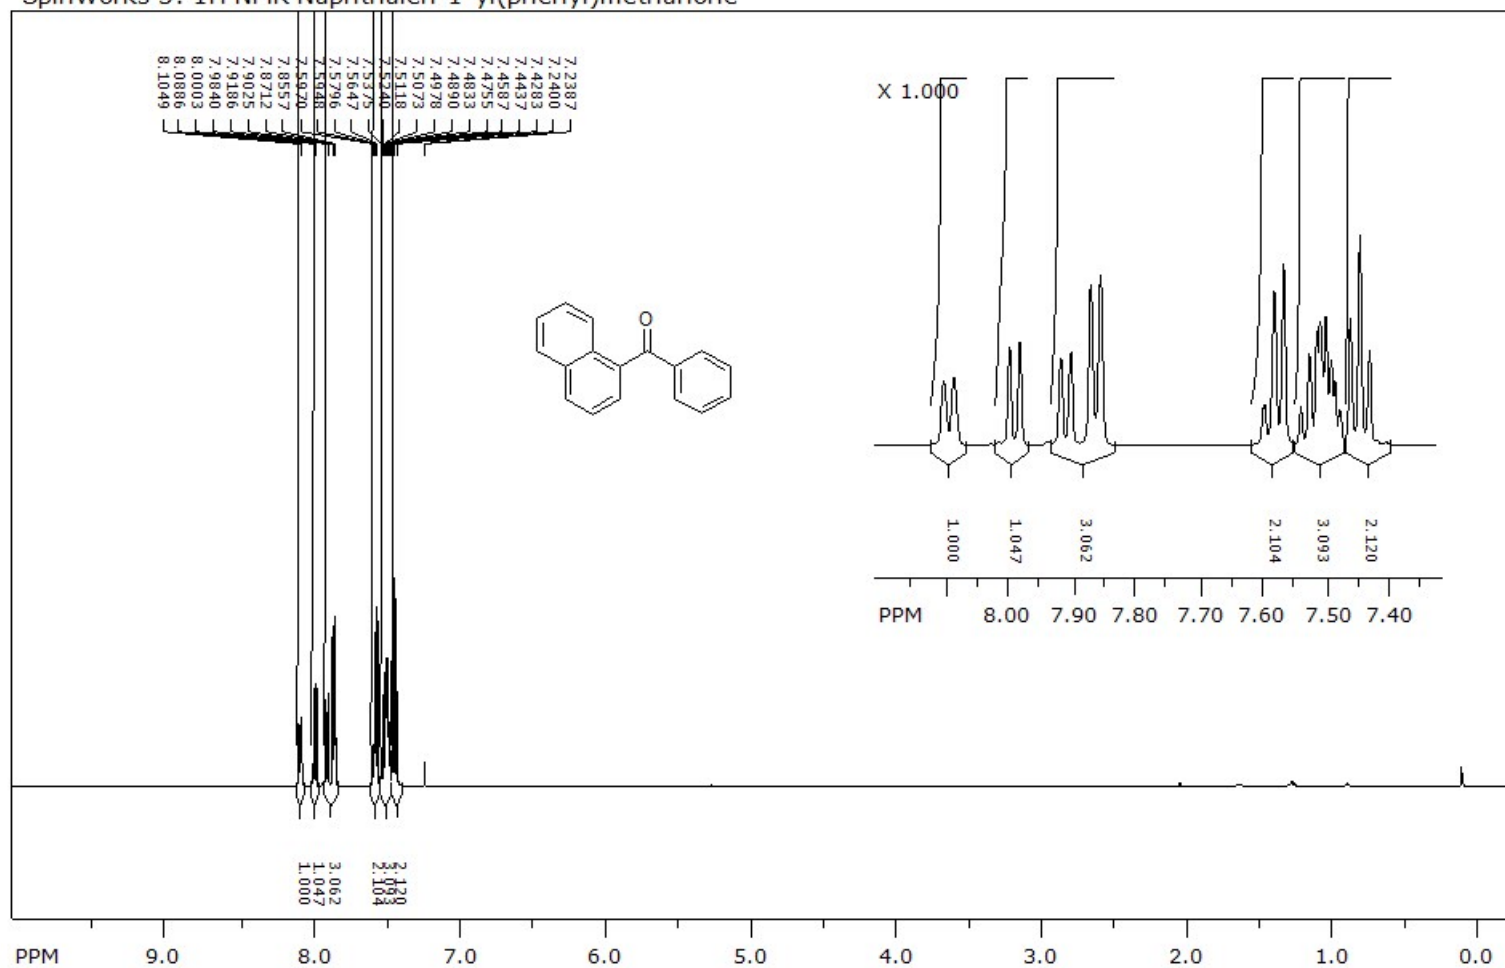

file: ...Users\Przemek\Desktop\PW6037\1\fid exp: <zg30>  
 transmitter freq.: 500.133751 MHz  
 time domain size: 65536 points  
 width: 12500.00 Hz = 24.9933 ppm = 0.190735 Hz/pt  
 number of scans: 16

freq. of 0 ppm: 500.130024 MHz  
 processed size: 65536 complex points  
 LB: 0.300 GF: 0.0000  
 Hz/cm: 207.660 ppm/cm: 0.41521

SpinWorks 3: <sup>13</sup>C NMR naphthalen-1-yl(phenyl)methanone

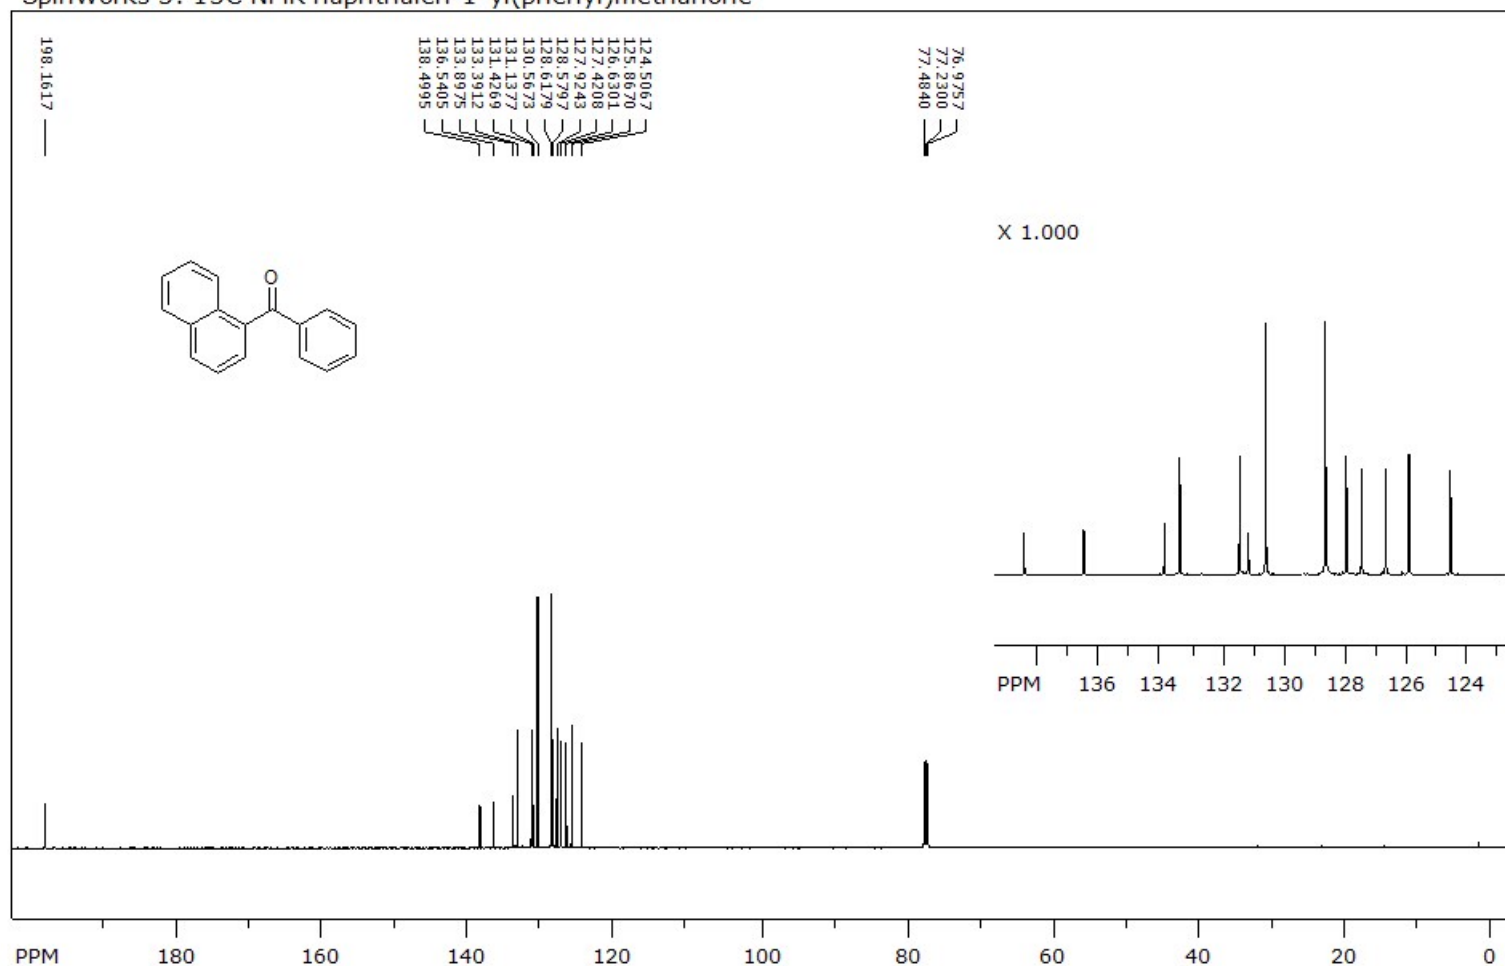

file: ...Users\Przemek\Desktop\PW6037\2\fid expt: <zggg30>  
 transmitter freq.: 125.770364 MHz  
 time domain size: 65536 points  
 width: 29761.90 Hz = 236.6369 ppm = 0.454131 Hz/pt  
 number of scans: 2267

freq. of 0 ppm: 125.757771 MHz  
 processed size: 32768 complex points  
 LB: 1.000 GF: 0.0000  
 Hz/cm: 1041.540 ppm/cm: 8.28128



SpinWorks 3: 13 CNMR Phenyl(thien-2-yl)methanone

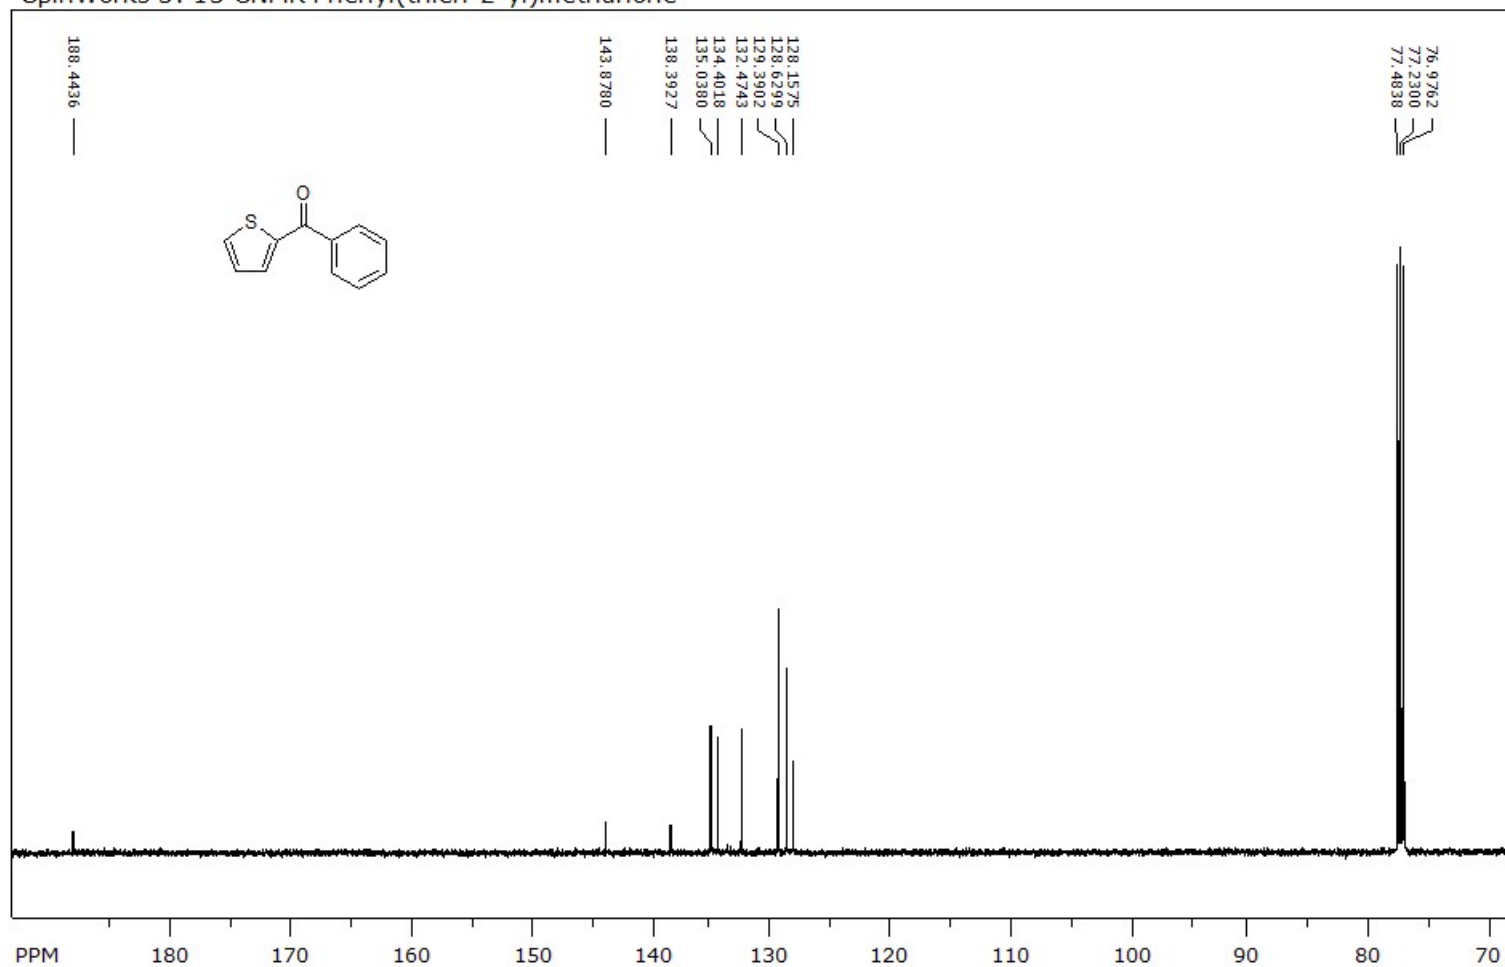

file: ...sers\Przemek\Desktop\PW60255\2\fid expt: <zggp30>  
 transmitter freq.: 125.770364 MHz  
 time domain size: 65536 points  
 width: 29761.90 Hz = 236.6369 ppm = 0.454131 Hz/pt  
 number of scans: 1024

freq. of 0 ppm: 125.757762 MHz  
 processed size: 32768 complex points  
 LB: 1.000 GF: 0.0000  
 Hz/cm: 635.258 ppm/cm: 5.05094

SpinWorks 3: 1H NMR 1-Phthalanone

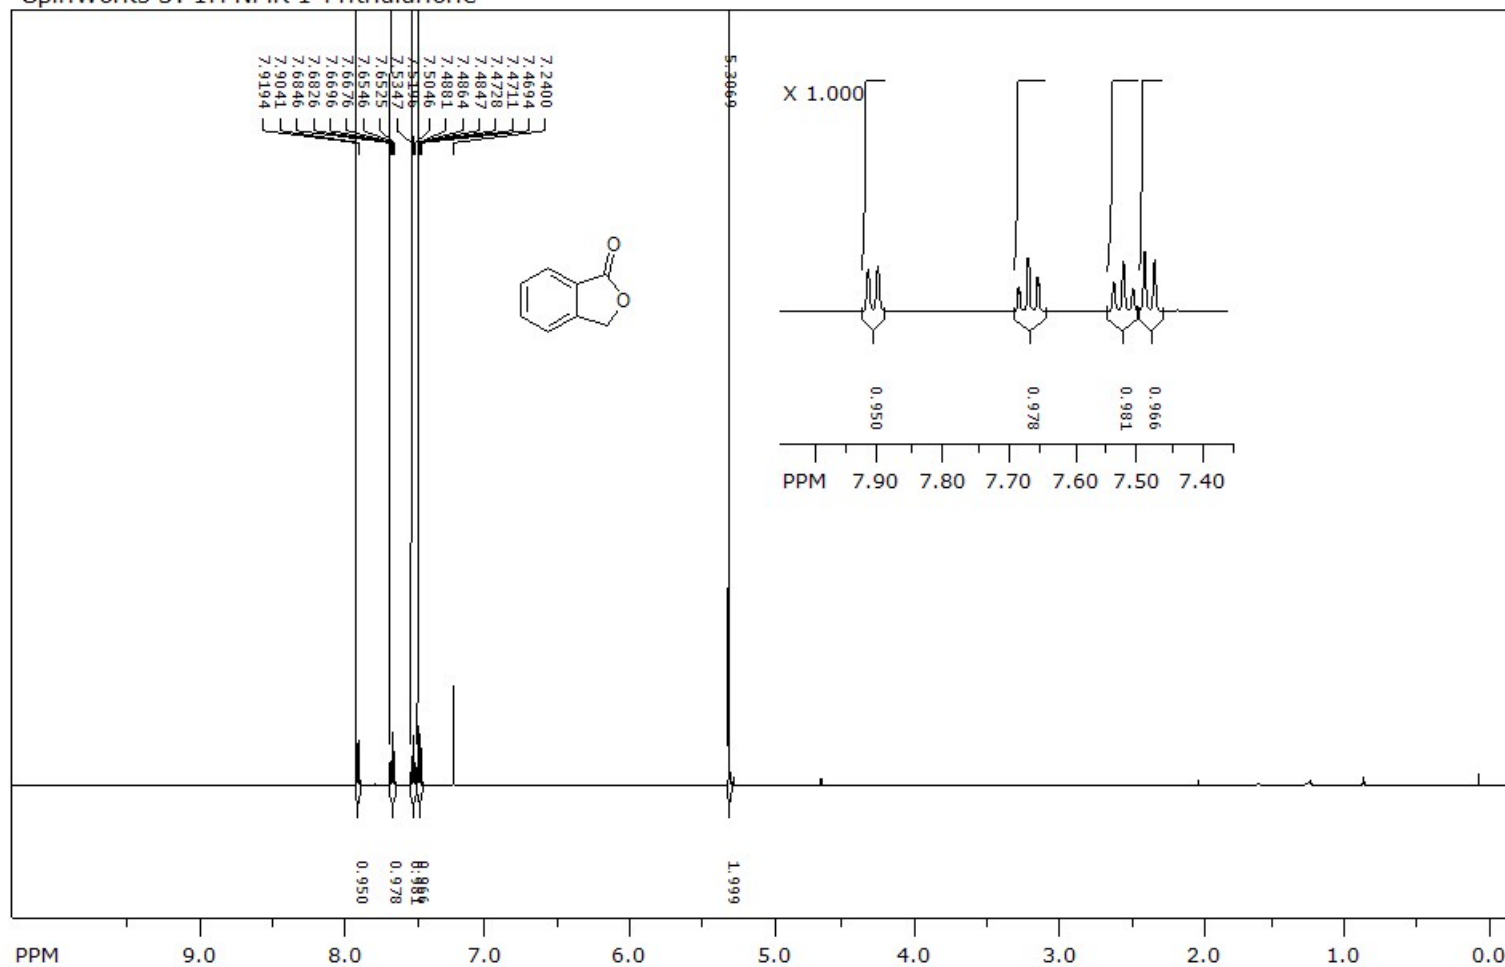

file: ...Users\Przemek\Desktop\PW6047\1\fid expt: <zg30>  
 transmitter freq.: 500.133751 MHz  
 time domain size: 65536 points  
 width: 12500.00 Hz = 24.9933 ppm = 0.190735 Hz/pt  
 number of scans: 16

freq. of 0 ppm: 500.130024 MHz  
 processed size: 65536 complex points  
 LB: 0.300 GF: 0.0000  
 Hz/cm: 211.489 ppm/cm: 0.42287

SpinWorks 3: <sup>13</sup>C NMR 1-Phthalanone

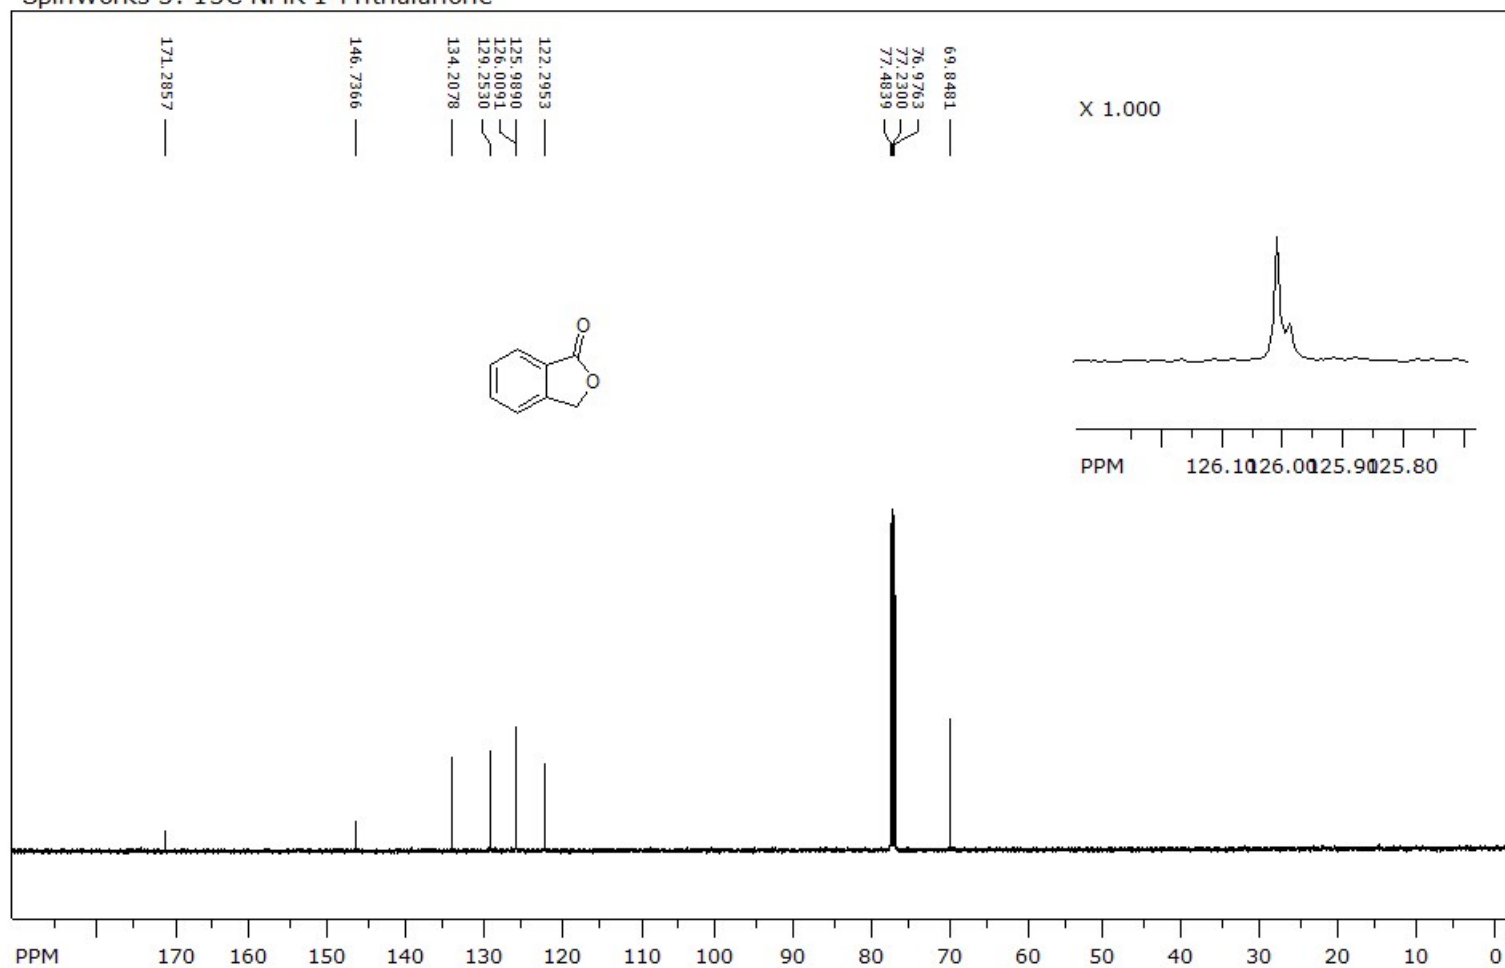

file: ...Users\Przemek\Desktop\PW6047\2\fid expt: <zggg30>  
 transmitter freq.: 125.770364 MHz  
 time domain size: 65536 points  
 width: 29761.90 Hz = 236.6369 ppm = 0.454131 Hz/pt  
 number of scans: 828

freq. of 0 ppm: 125.757763 MHz  
 processed size: 32768 complex points  
 LB: 1.000 GF: 0.0000  
 Hz/cm: 980.750 ppm/cm: 7.79794

SpinWorks 3: 1H NMR 4-Bromobenzophenone

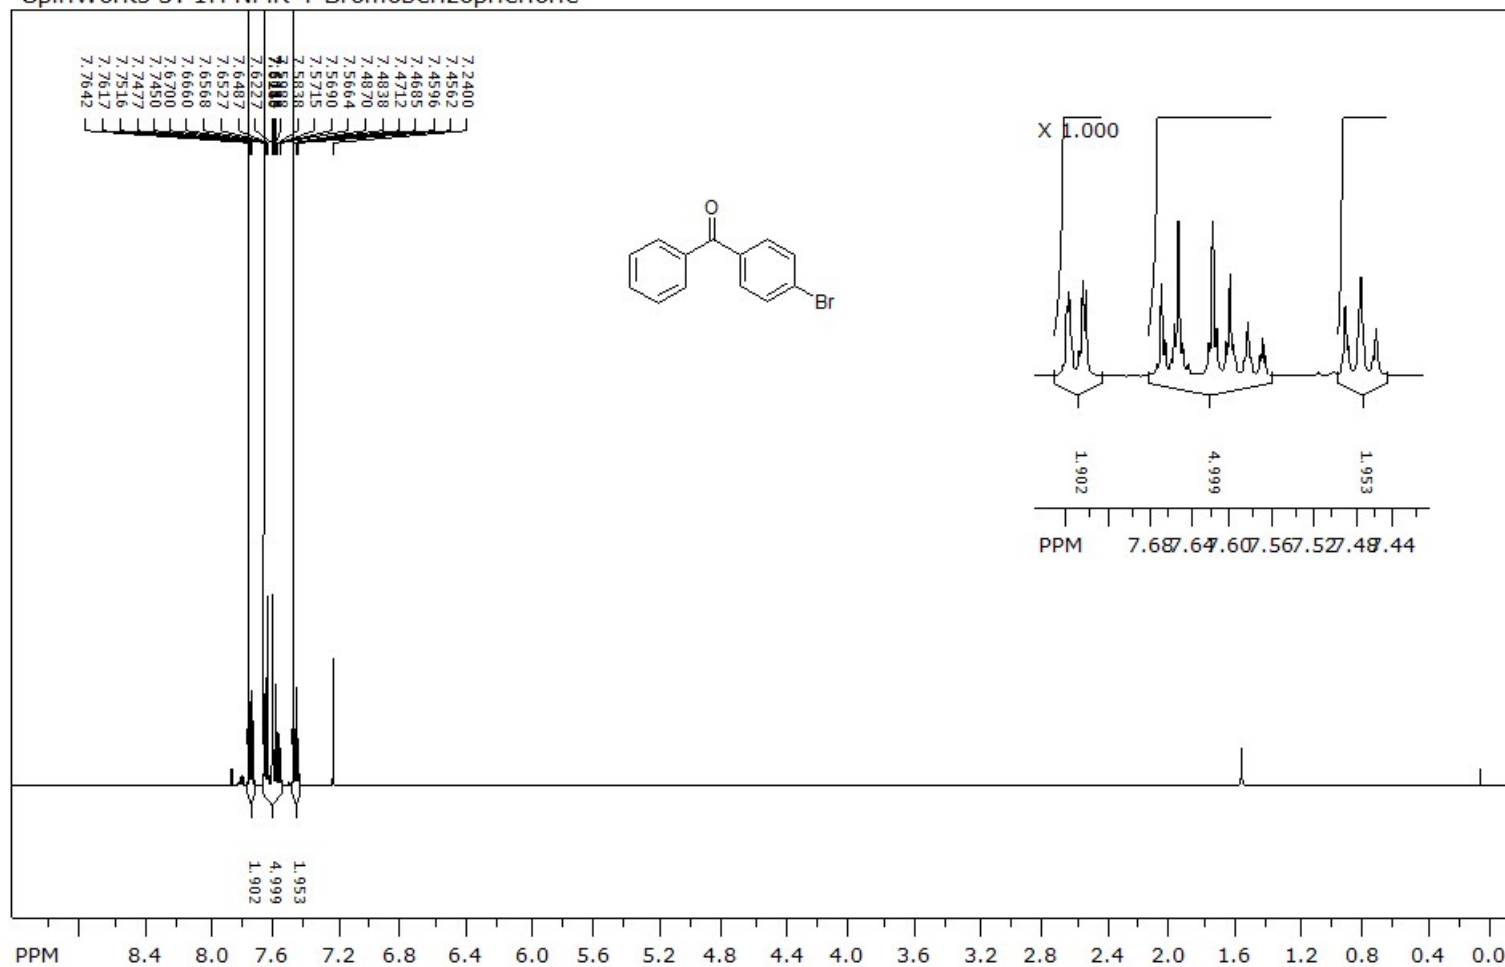

file: ...ony\PW6005 4-bromobenzofenon\1\fid expt: <zg30>  
 transmitter freq.: 500.133751 MHz  
 time domain size: 65536 points  
 width: 12500.00 Hz = 24.9933 ppm = 0.190735 Hz/pt  
 number of scans: 16

freq. of 0 ppm: 500.130024 MHz  
 processed size: 65536 complex points  
 LB: 0.300 GF: 0.0000  
 Hz/cm: 188.936 ppm/cm: 0.37777

SpinWorks 3: 13C NMR 4-Bromobenzophenone

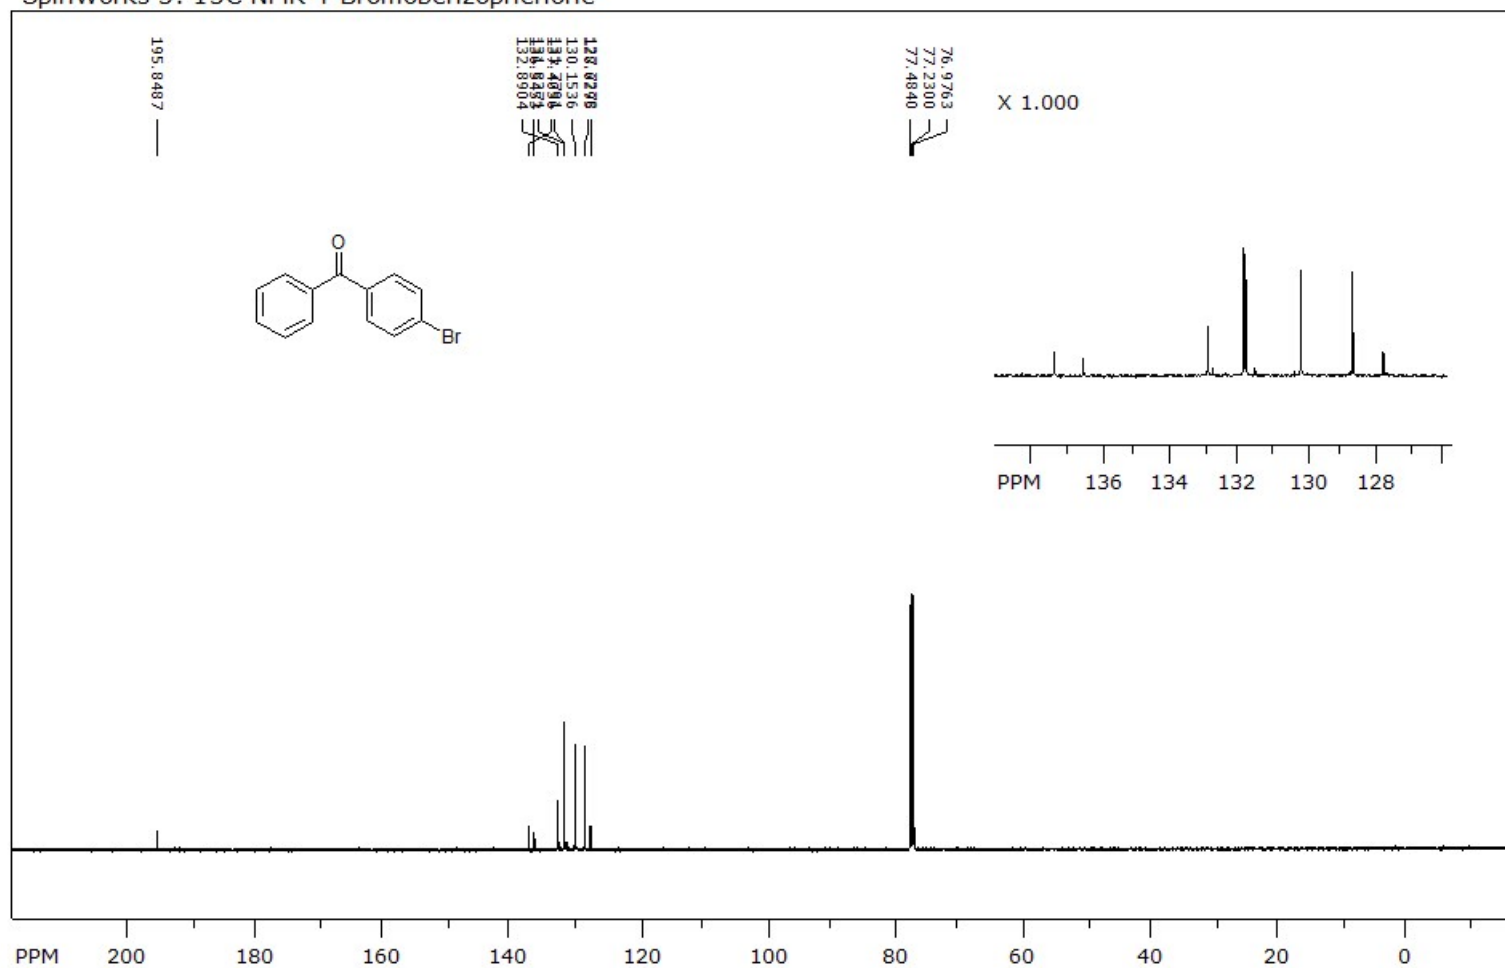

file: ...ony\PW6005 4-bromobenzofenon\2\fid expt: <zggg30>  
 transmitter freq.: 125.770364 MHz  
 time domain size: 65536 points  
 width: 29761.90 Hz = 236.6369 ppm = 0.454131 Hz/pt  
 number of scans: 1024

freq. of 0 ppm: 125.757762 MHz  
 processed size: 32768 complex points  
 LB: 1.000 GF: 0.0000  
 Hz/cm: 1190.476 ppm/cm: 9.46547



SpinWorks 3: 1H NMR 2-Bromobenzophenone

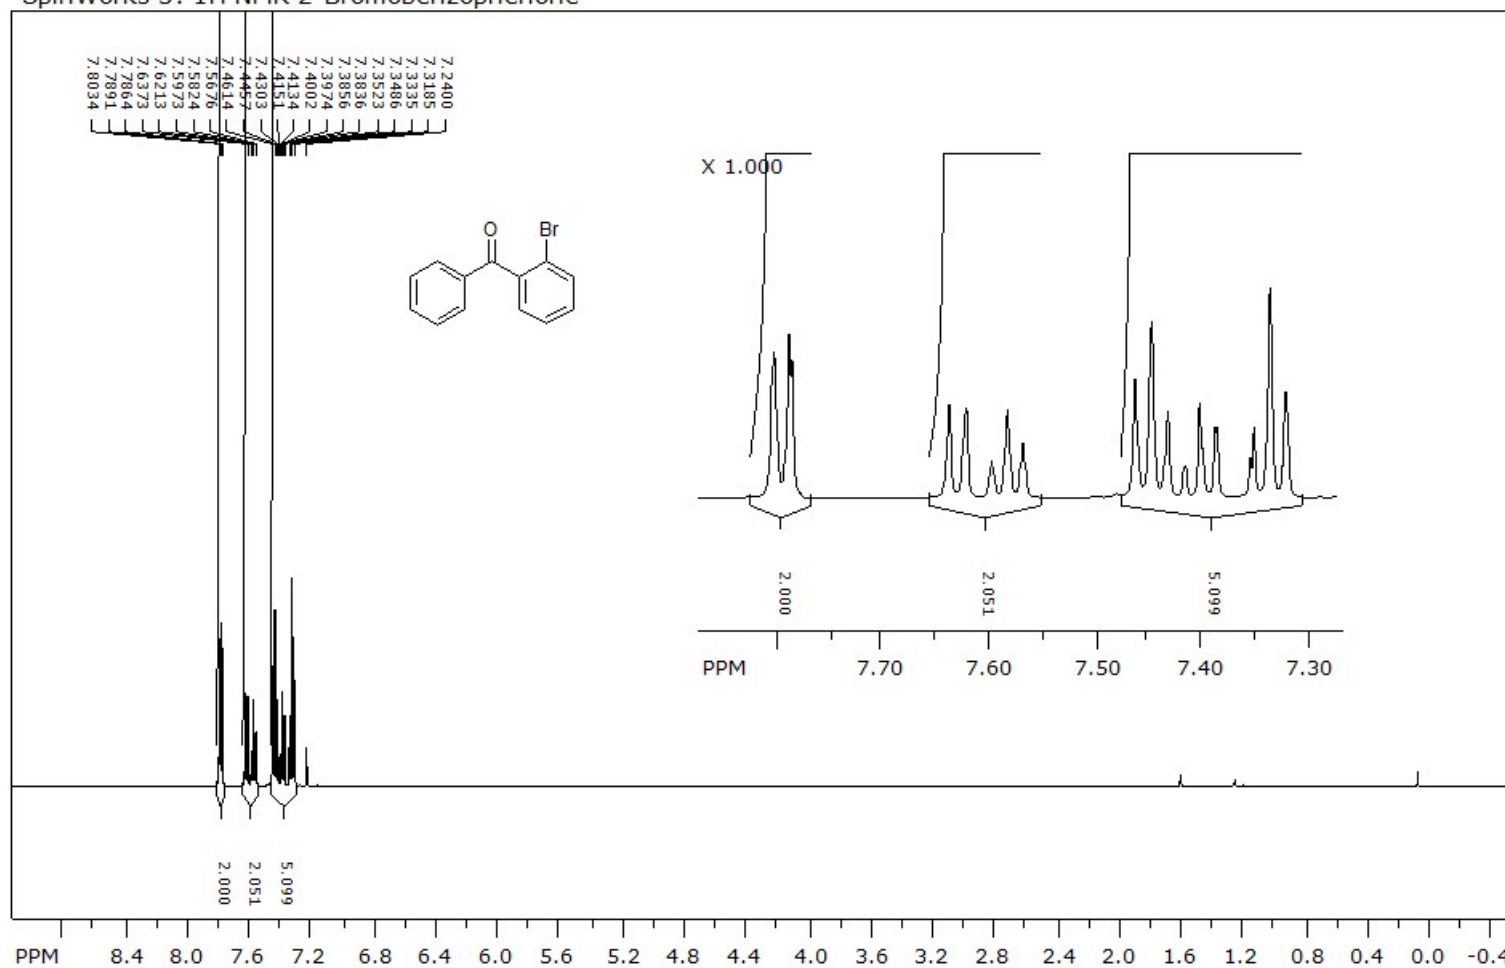

file: ...któw\Diarylowe ketony\MM59\_1\1\fid exp: <zg30>  
 transmitter freq.: 500.133751 MHz  
 time domain size: 65536 points  
 width: 12500.00 Hz = 24.9933 ppm = 0.190735 Hz/pt  
 number of scans: 16

freq. of 0 ppm: 500.130023 MHz  
 processed size: 65536 complex points  
 LB: 0.300 GF: 0.0000  
 Hz/cm: 194.894 ppm/cm: 0.38968

SpinWorks 3: <sup>13</sup>C NMR 2-Bromobenzophenone

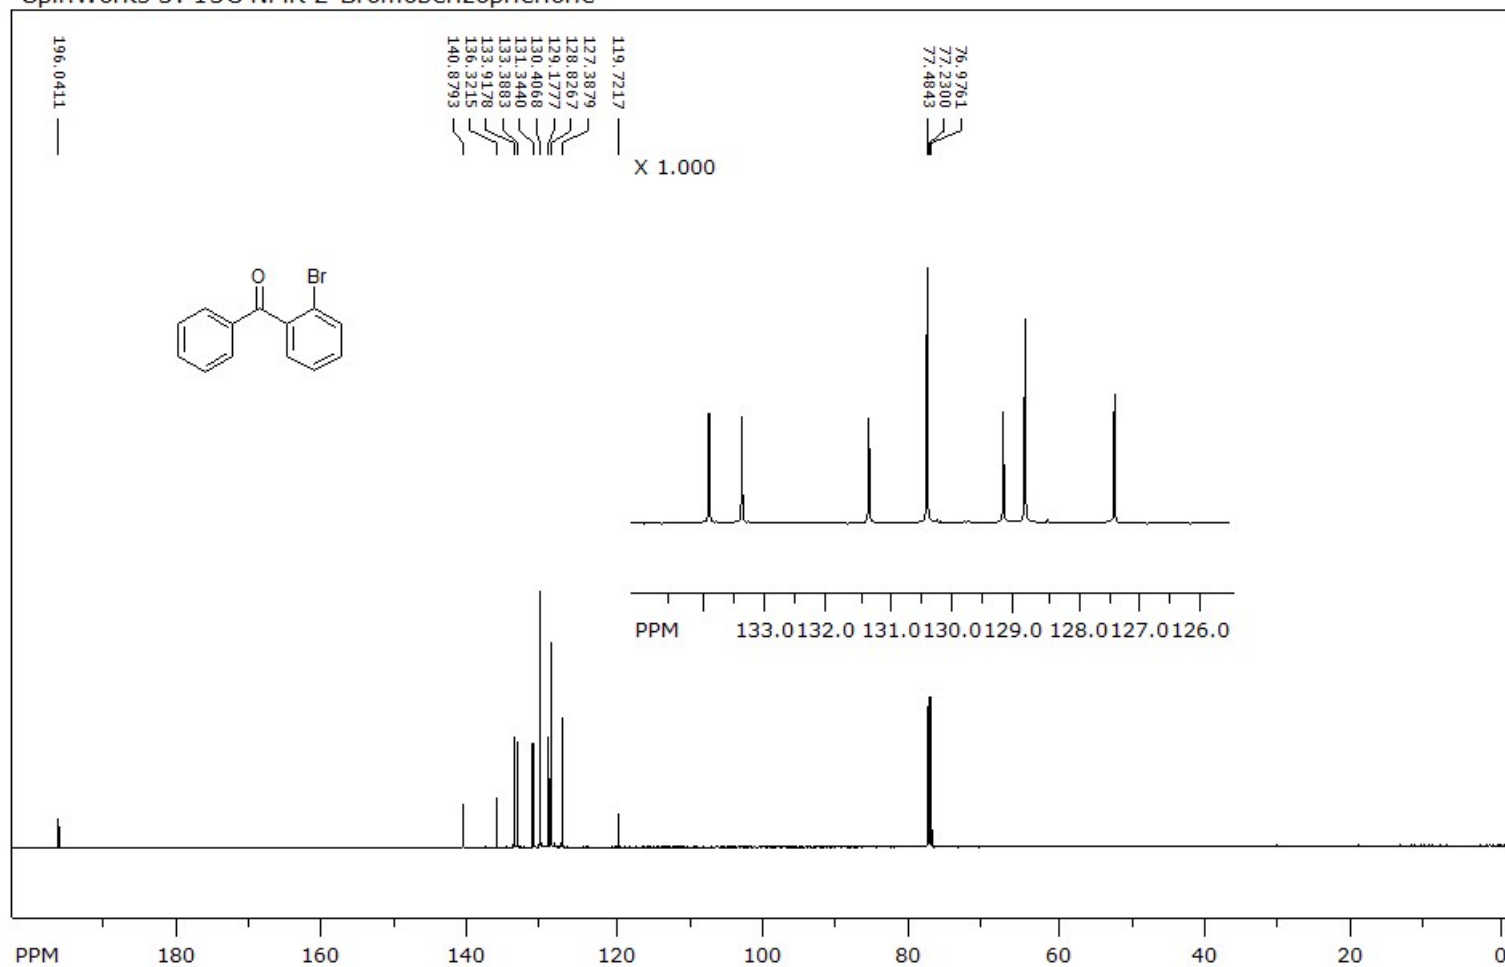

file: ...Users\Przemek\Desktop\MM59\_1\2\fid expt: <zgpg30>  
 transmitter freq.: 125.770364 MHz  
 time domain size: 65536 points  
 width: 29761.90 Hz = 236.6369 ppm = 0.454131 Hz/pt  
 number of scans: 3072

freq. of 0 ppm: 125.757766 MHz  
 processed size: 32768 complex points  
 LB: 1.000 GF: 0.0000  
 Hz/cm: 1034.448 ppm/cm: 8.22489

SpinWorks 3: <sup>1</sup>H NMR 2-Bromo-2'-methoxybenzophenone

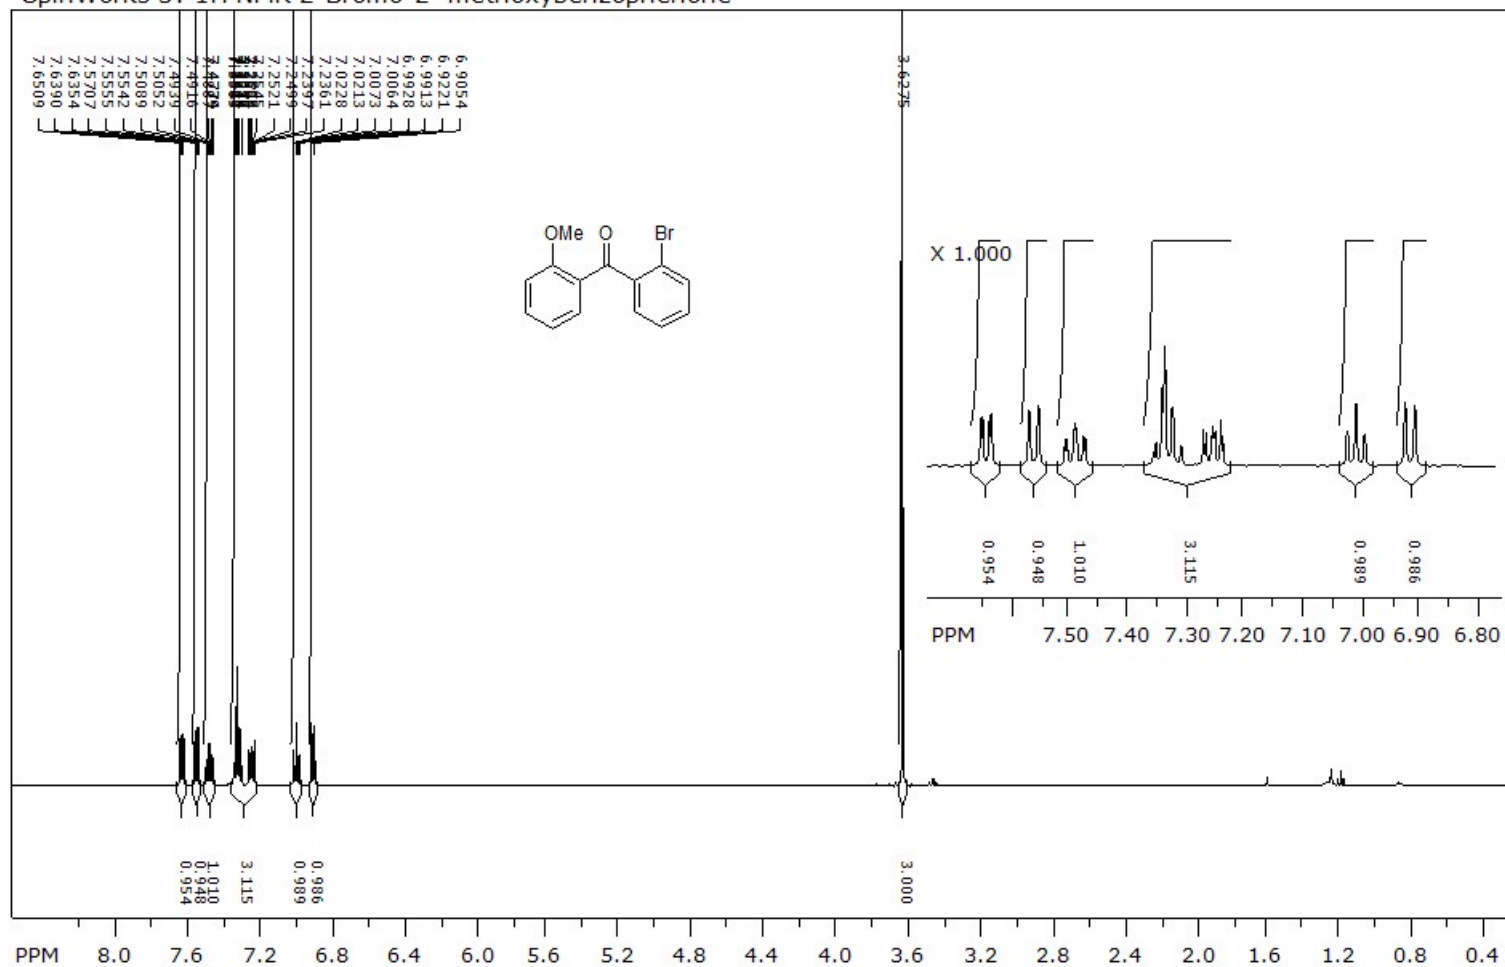

file: ...:\Users\Przemek\Desktop\MM60\1\fid expt: <zg30>  
 transmitter freq.: 500.133751 MHz  
 time domain size: 65536 points  
 width: 12500.00 Hz = 24.9933 ppm = 0.190735 Hz/pt  
 number of scans: 16

freq. of 0 ppm: 500.130024 MHz  
 processed size: 65536 complex points  
 LB: 0.300 GF: 0.0000  
 Hz/cm: 168.085 ppm/cm: 0.33608

SpinWorks 3: <sup>13</sup>C NMR 2-Bromo-2'-methoxybenzophenone

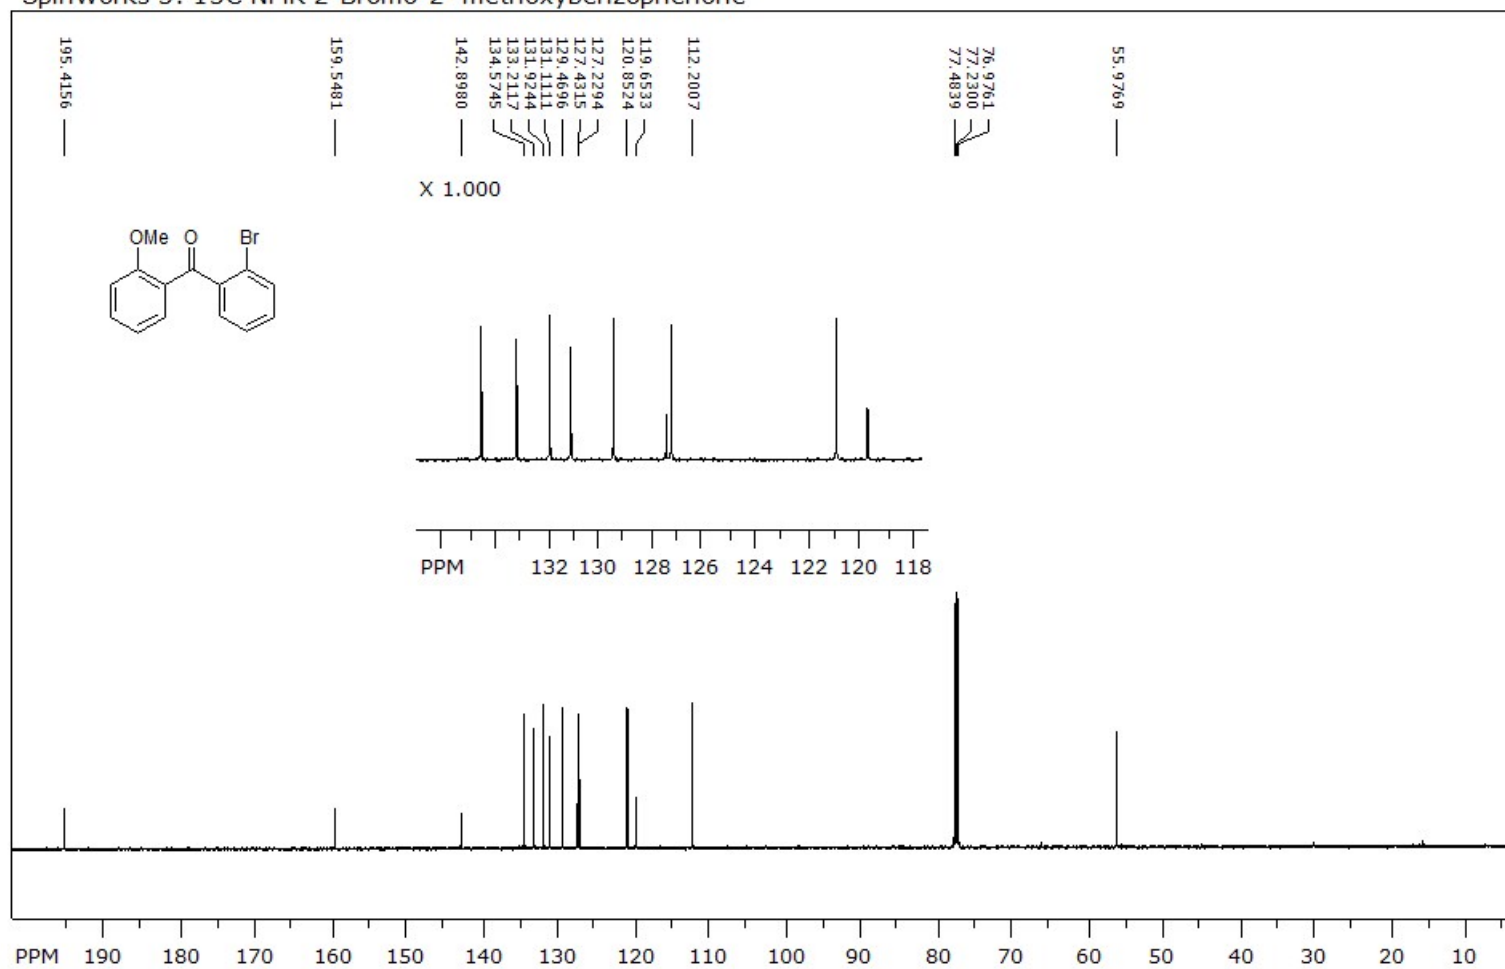

file: ...:\Users\Przemek\Desktop\MM60\2\fid expt: <zggg30>  
 transmitter freq.: 125.770364 MHz  
 time domain size: 65536 points  
 width: 29761.90 Hz = 236.6369 ppm = 0.454131 Hz/pt  
 number of scans: 1024

freq. of 0 ppm: 125.757765 MHz  
 processed size: 32768 complex points  
 LB: 1.000 GF: 0.0000  
 Hz/cm: 1005.066 ppm/cm: 7.99128

SpinWorks 3: 1H NMR 2-Bromo-3'-methoxybenzophenone

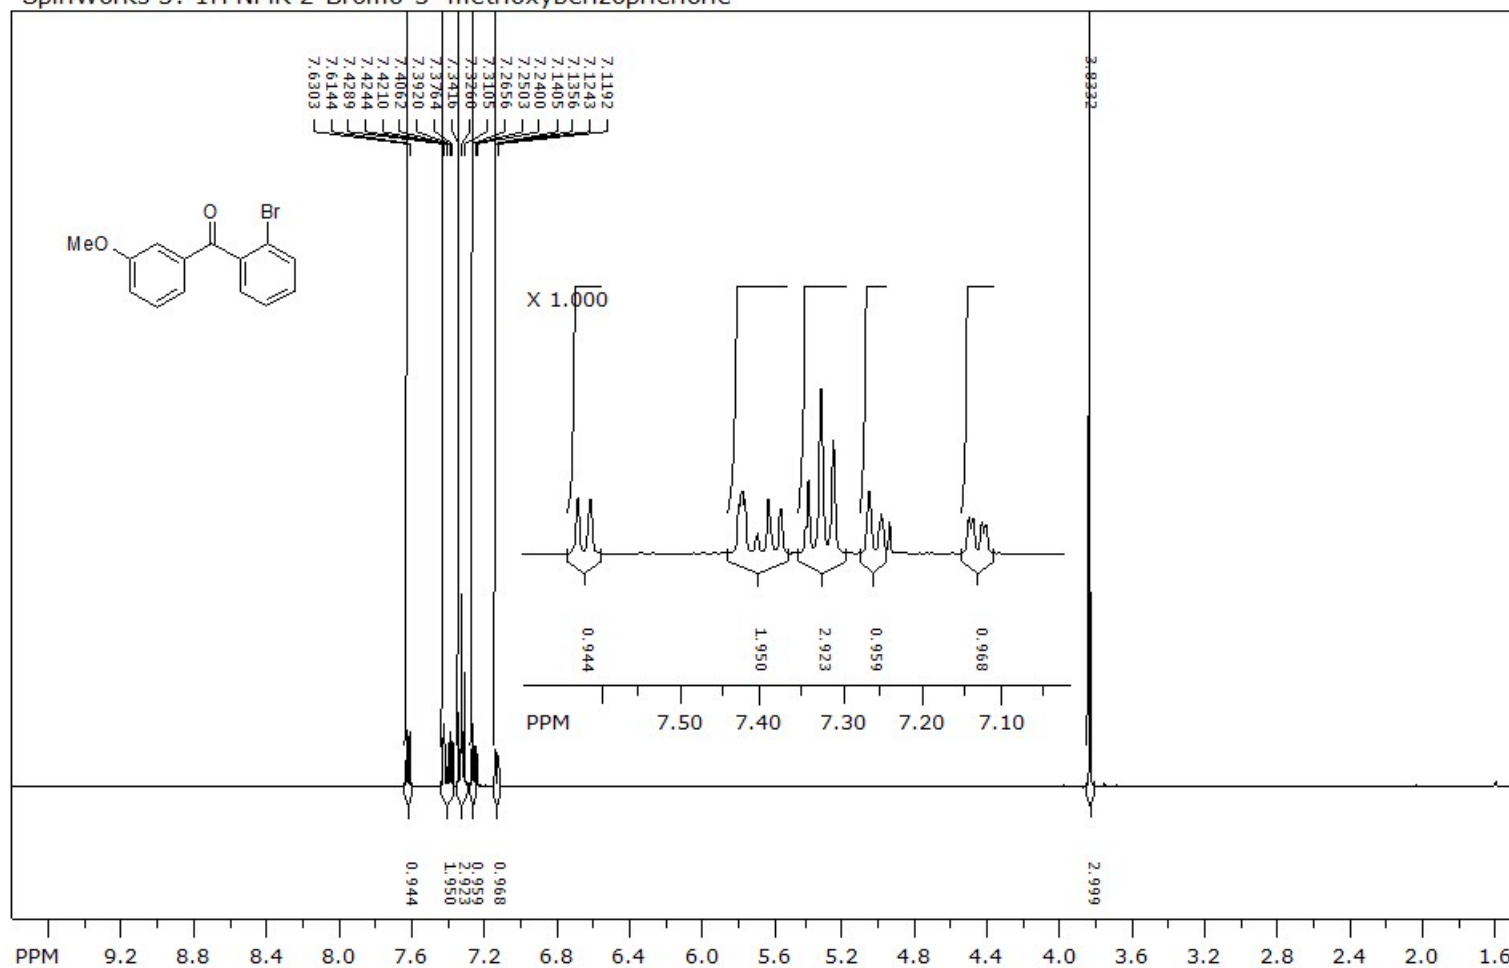

file: ...:\Users\Przemek\Desktop\MM69\1\fid exp: <zg30>  
 transmitter freq.: 500.133751 MHz  
 time domain size: 65536 points  
 width: 12500.00 Hz = 24.9933 ppm = 0.190735 Hz/pt  
 number of scans: 16

freq. of 0 ppm: 500.130024 MHz  
 processed size: 65536 complex points  
 LB: 0.300 GF: 0.0000  
 Hz/cm: 167.660 ppm/cm: 0.33523

SpinWorks 3: 13 C NMR 2-Bromo-3'-methoxybenzophenone

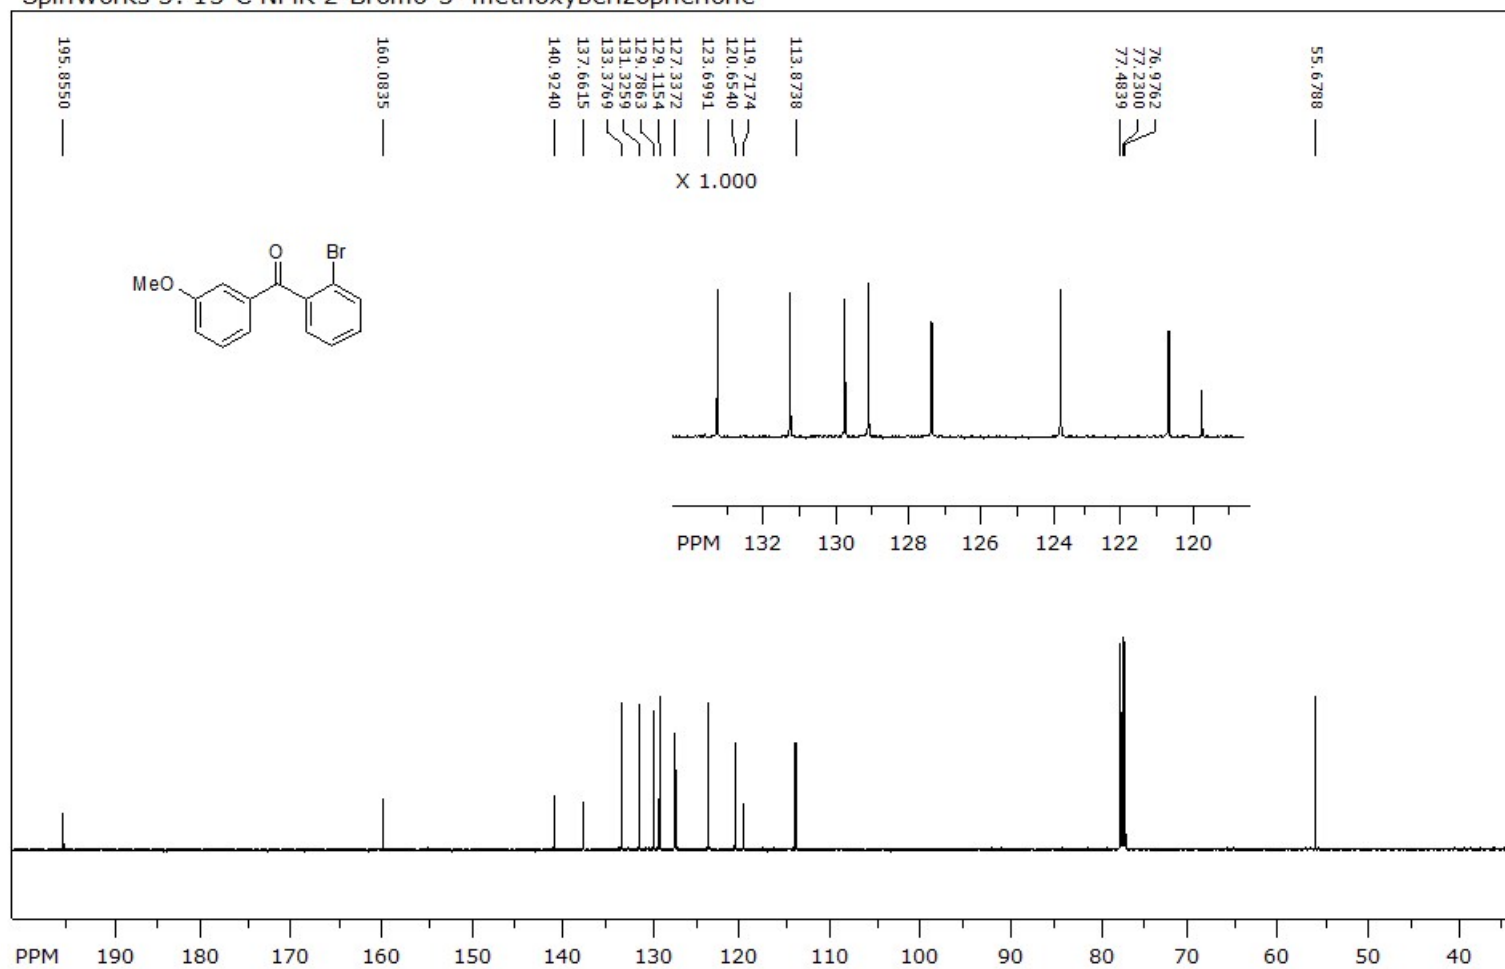

file: ...:\Users\Przemek\Desktop\MM69\2\fid exp: <zggg30>  
 transmitter freq.: 125.770364 MHz  
 time domain size: 65536 points  
 width: 29761.90 Hz = 236.6369 ppm = 0.454131 Hz/pt  
 number of scans: 1024

freq. of 0 ppm: 125.757764 MHz  
 processed size: 32768 complex points  
 LB: 1.000 GF: 0.0000  
 Hz/cm: 849.037 ppm/cm: 6.75070

SpinWorks 3: 1H NMR 2-Bromo-4'-methoxybenzophenone

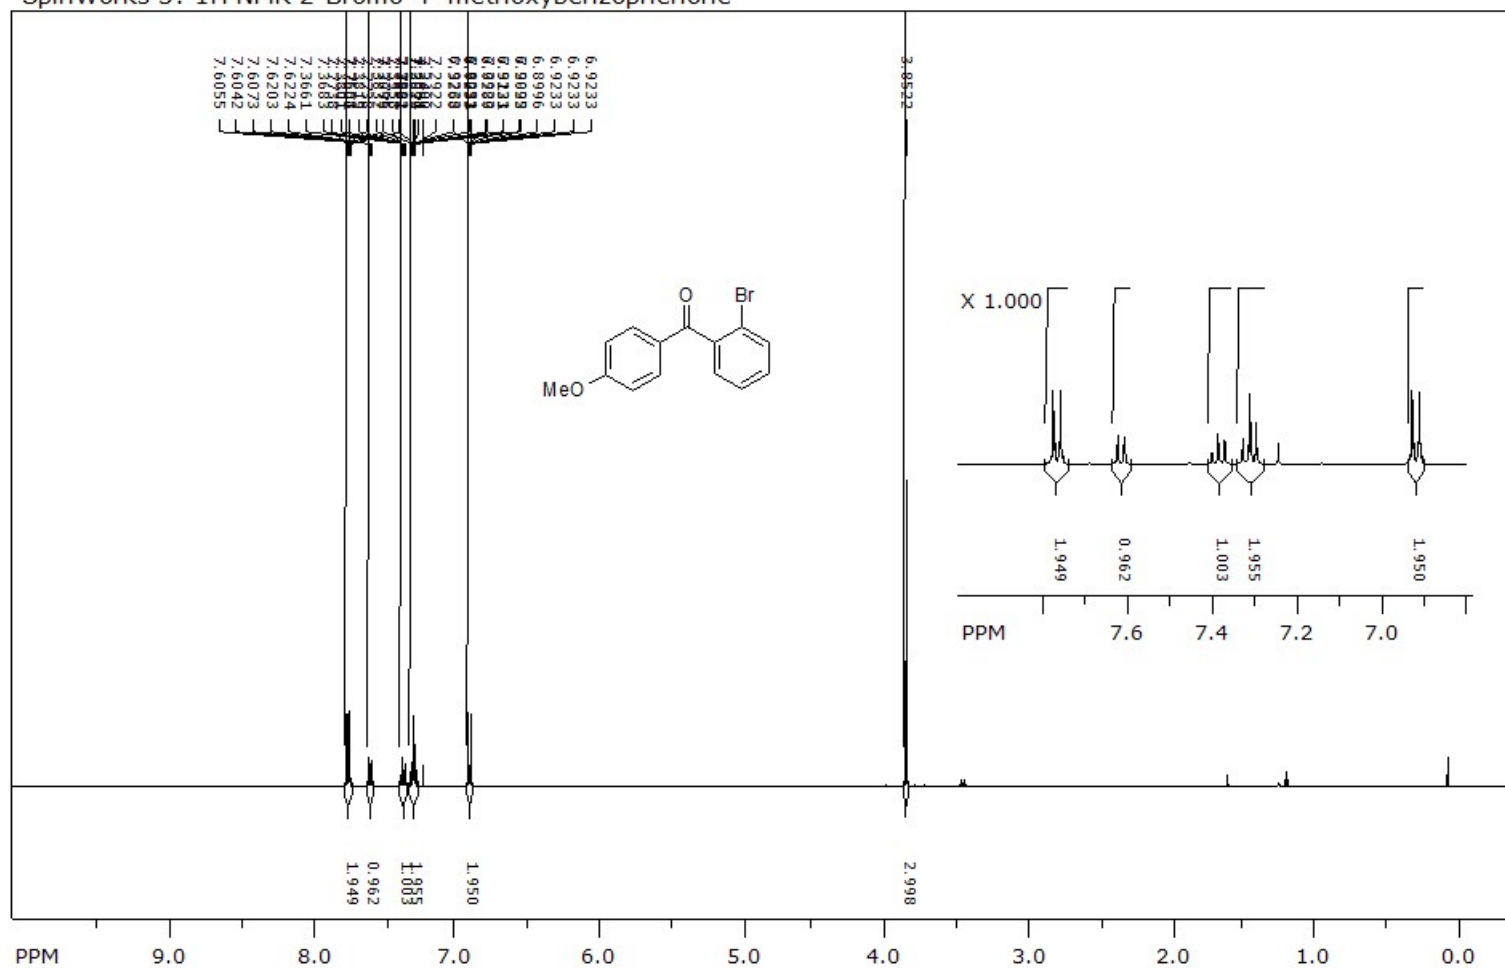

file: ...:\Users\Przemek\Desktop\MM68\1\fid exp: <zg30>  
 transmitter freq.: 500.133751 MHz  
 time domain size: 65536 points  
 width: 12500.00 Hz = 0.190735 ppm = 0.190735 Hz/pt  
 number of scans: 48

freq. of 0 ppm: 500.130024 MHz  
 processed size: 65536 complex points  
 LB: 0.300 GF: 0.0000  
 Hz/cm: 211.489 ppm/cm: 0.42287

SpinWorks 3: <sup>13</sup>C NMR 2-Bromo-4'-methoxybenzophenone

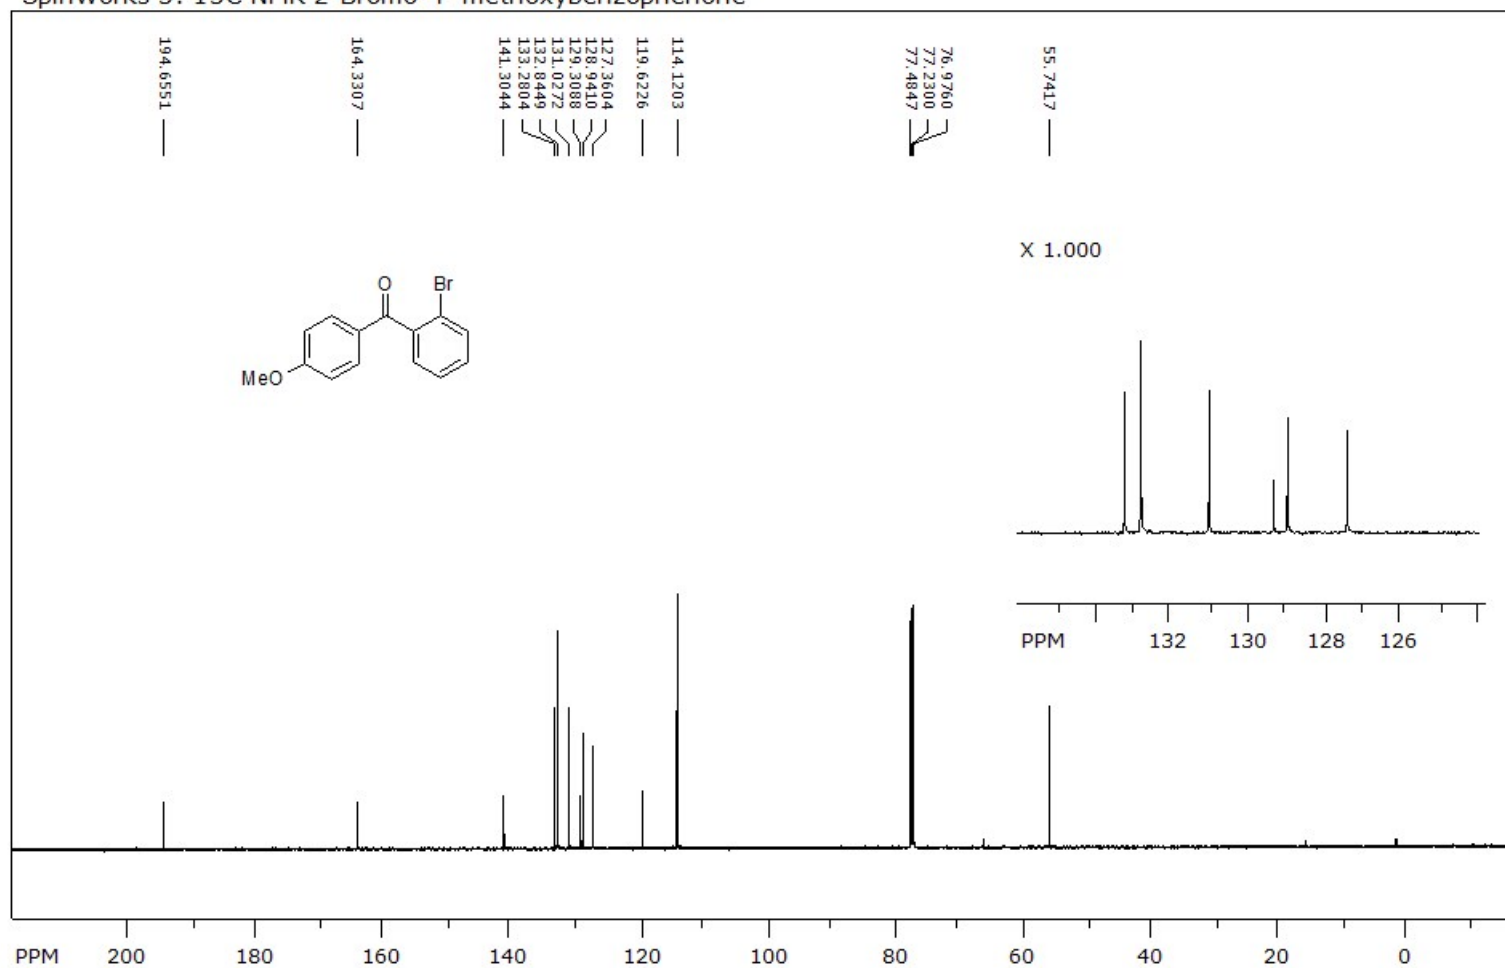

file: ...:\Users\Przemek\Desktop\MM68\2\fid exp: <zggp30>  
 transmitter freq.: 125.770364 MHz  
 time domain size: 65536 points  
 width: 29761.90 Hz = 236.6369 ppm = 0.454131 Hz/pt  
 number of scans: 1024

freq. of 0 ppm: 125.757765 MHz  
 processed size: 32768 complex points  
 LB: 1.000 GF: 0.0000  
 Hz/cm: 1190.476 ppm/cm: 9.46547



SpinWorks 3: 1H NMR 2-Bromo-4'-methylbenzophenone

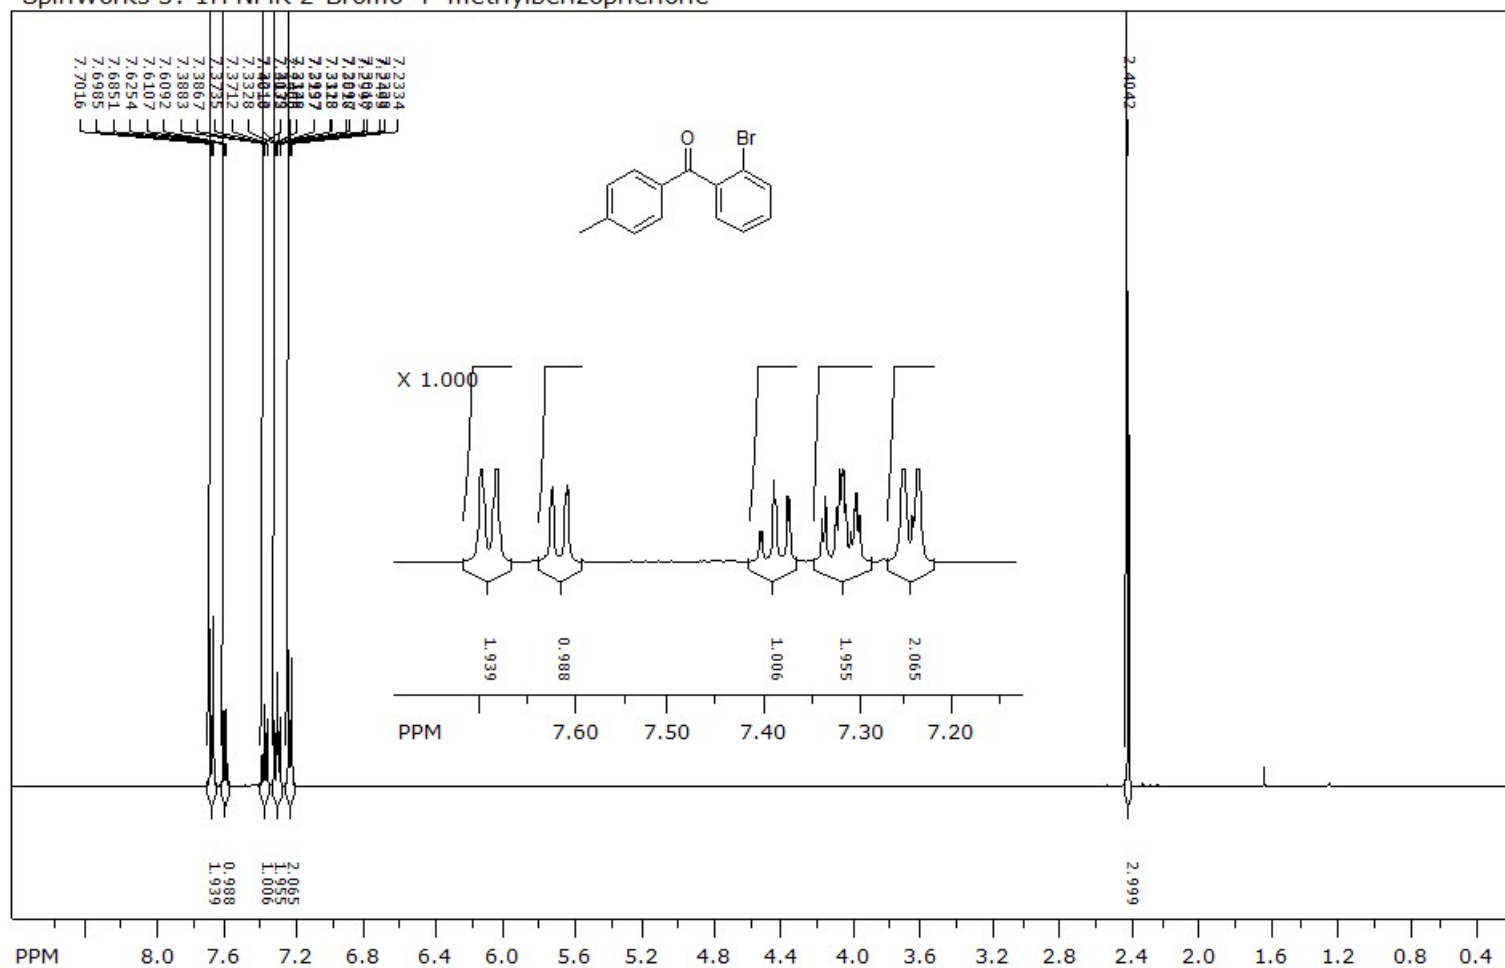

file: ...:\Users\Przemek\Desktop\MM65\1\fid exp: <zg30>  
 transmitter freq.: 500.133751 MHz  
 time domain size: 65536 points  
 width: 12500.00 Hz = 24.9933 ppm = 0.190735 Hz/pt  
 number of scans: 16

freq. of 0 ppm: 500.130024 MHz  
 processed size: 65536 complex points  
 LB: 0.300 GF: 0.0000  
 Hz/cm: 174.043 ppm/cm: 0.34799

SpinWorks 3: <sup>13</sup>C NMR 2-Bromo-4'-methylbenzophenone

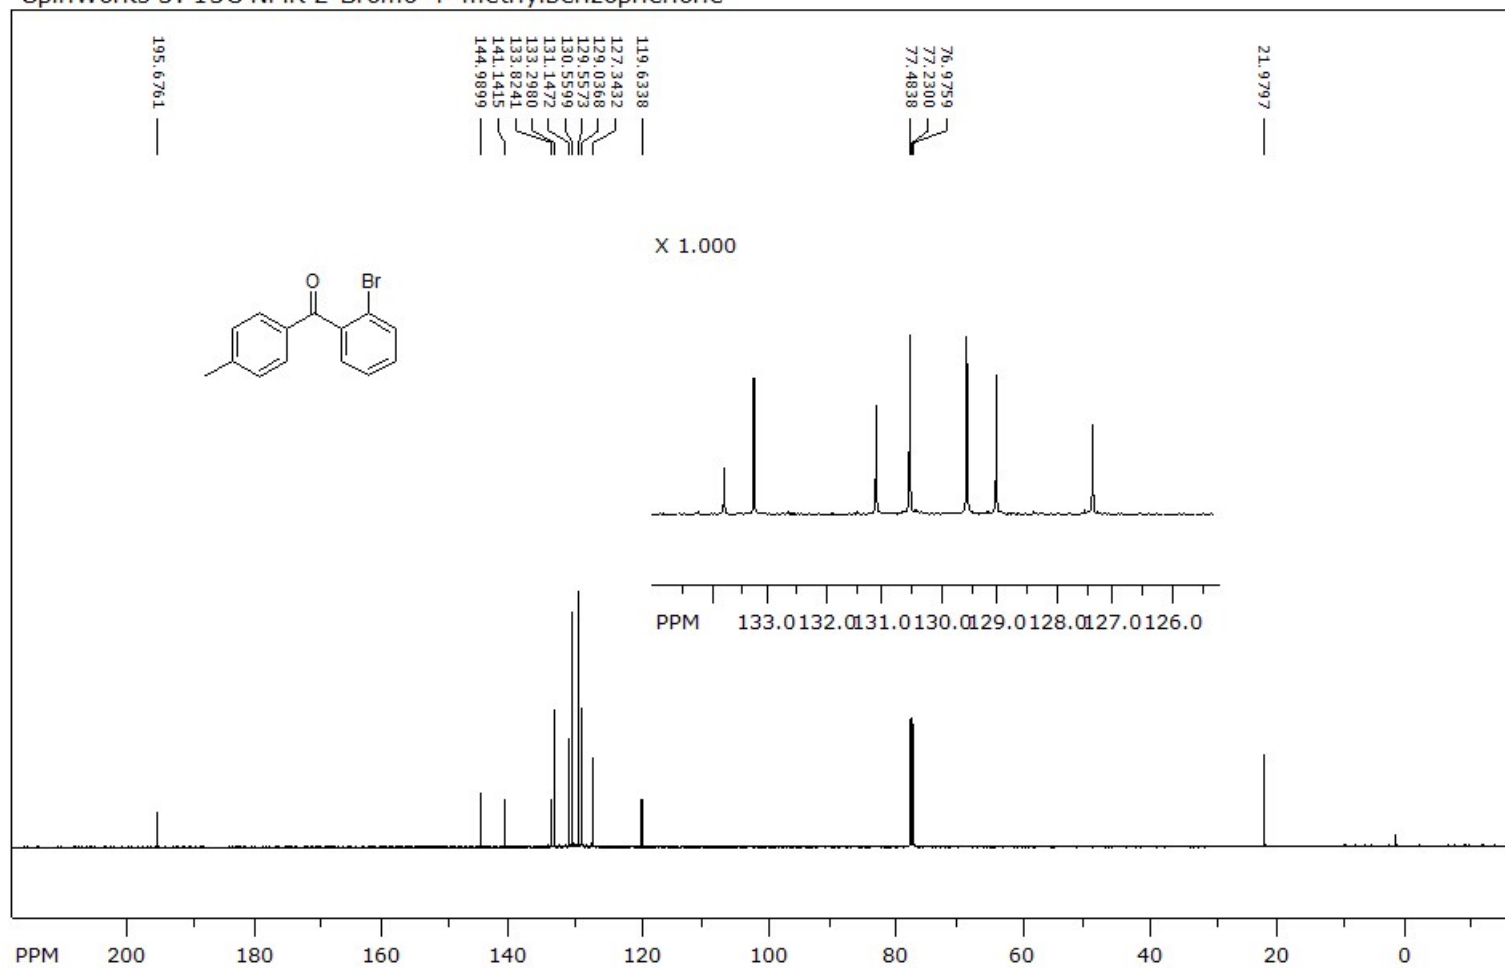

file: ...:\Users\Przemek\Desktop\MM65\2\fid exp: <zpgg30>  
 transmitter freq.: 125.770364 MHz  
 time domain size: 65536 points  
 width: 29761.90 Hz = 236.6369 ppm = 0.454131 Hz/pt  
 number of scans: 819

freq. of 0 ppm: 125.757768 MHz  
 processed size: 32768 complex points  
 LB: 1.000 GF: 0.0000  
 Hz/cm: 1190.476 ppm/cm: 9.46547

SpinWorks 3: 1H NMR 2-(2-Bromobenzoyl)thiophene

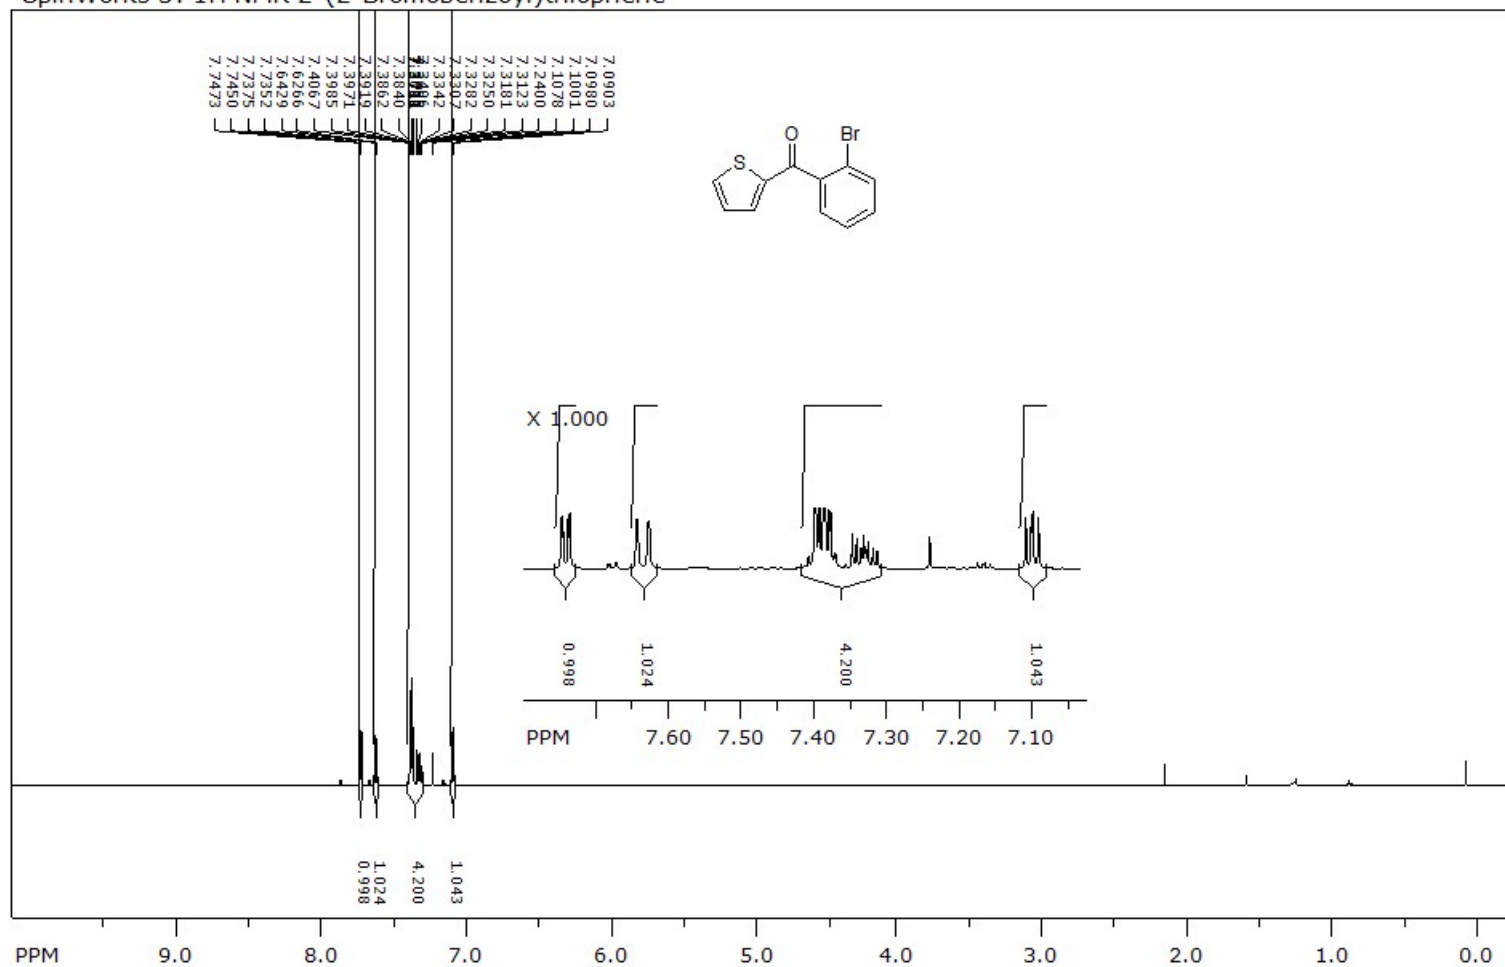

file: ...:\Users\Przemek\Desktop\MM64\1\fid exp: <zg30>  
 transmitter freq.: 500.133751 MHz  
 time domain size: 65536 points  
 width: 12500.00 Hz = 24.9933 ppm = 0.190735 Hz/pt  
 number of scans: 16

freq. of 0 ppm: 500.130024 MHz  
 processed size: 65536 complex points  
 LB: 0.300 GF: 0.0000  
 Hz/cm: 209.787 ppm/cm: 0.41946

SpinWorks 3: <sup>13</sup>C NMR 2-(2-Bromobenzoyl)thiophene

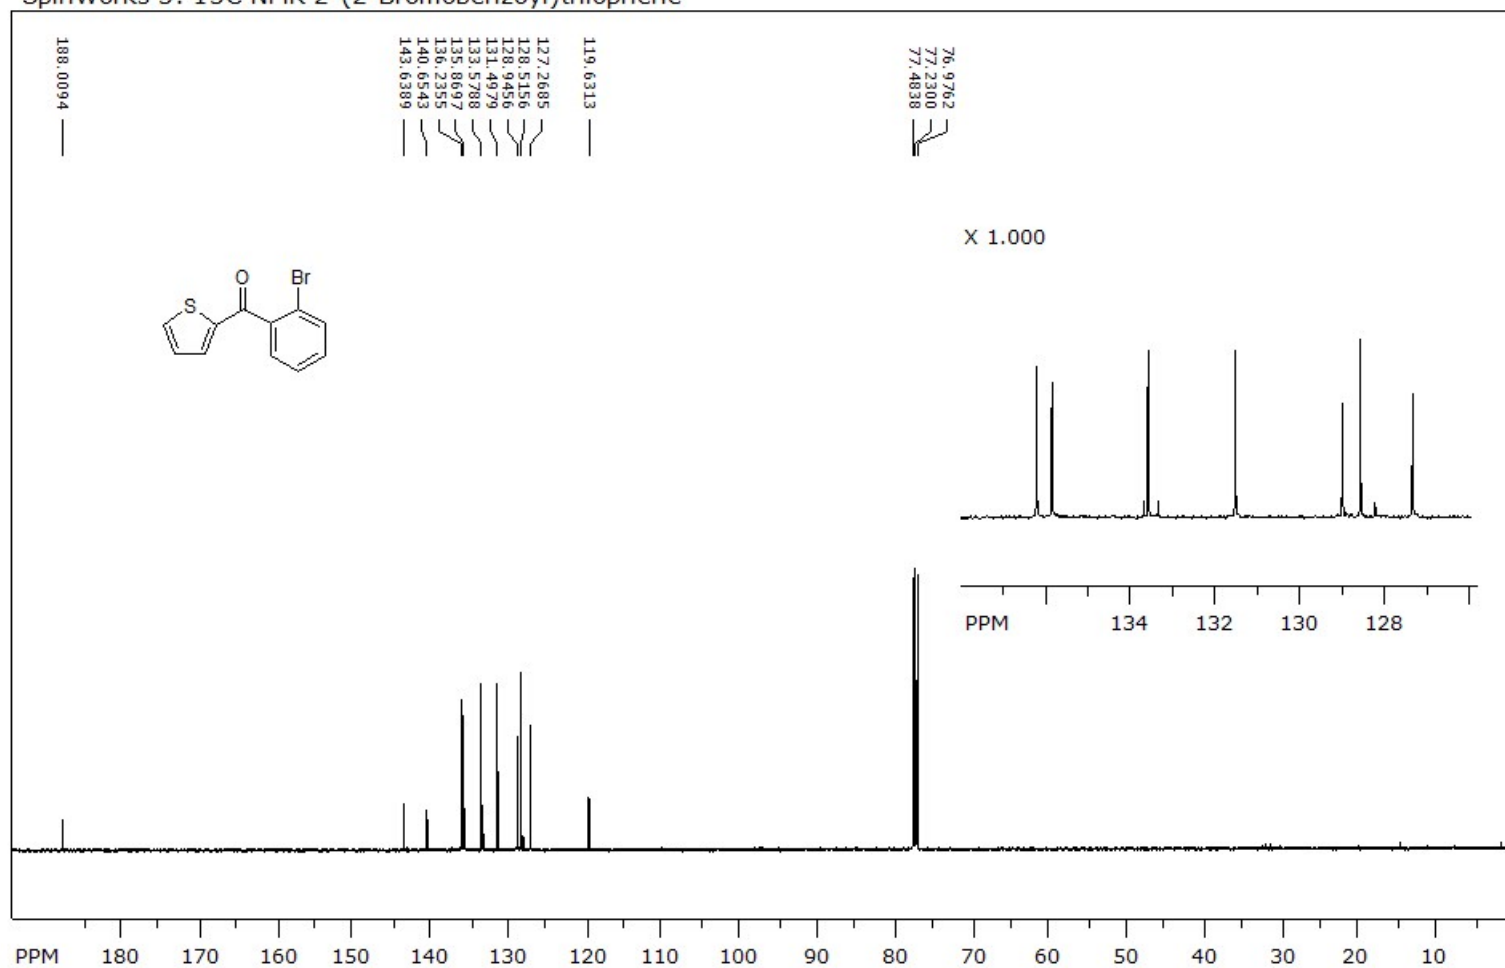

file: ...:\Users\Przemek\Desktop\MM64\2\fid exp: <zggg30>  
 transmitter freq.: 125.770364 MHz  
 time domain size: 65536 points  
 width: 29761.90 Hz = 236.6369 ppm = 0.454131 Hz/pt  
 number of scans: 1024

freq. of 0 ppm: 125.757765 MHz  
 processed size: 32768 complex points  
 LB: 1.000 GF: 0.0000  
 Hz/cm: 984.802 ppm/cm: 7.83016

SpinWorks 3: 1H NMR 2-bromophenyl-1-naphthylketone

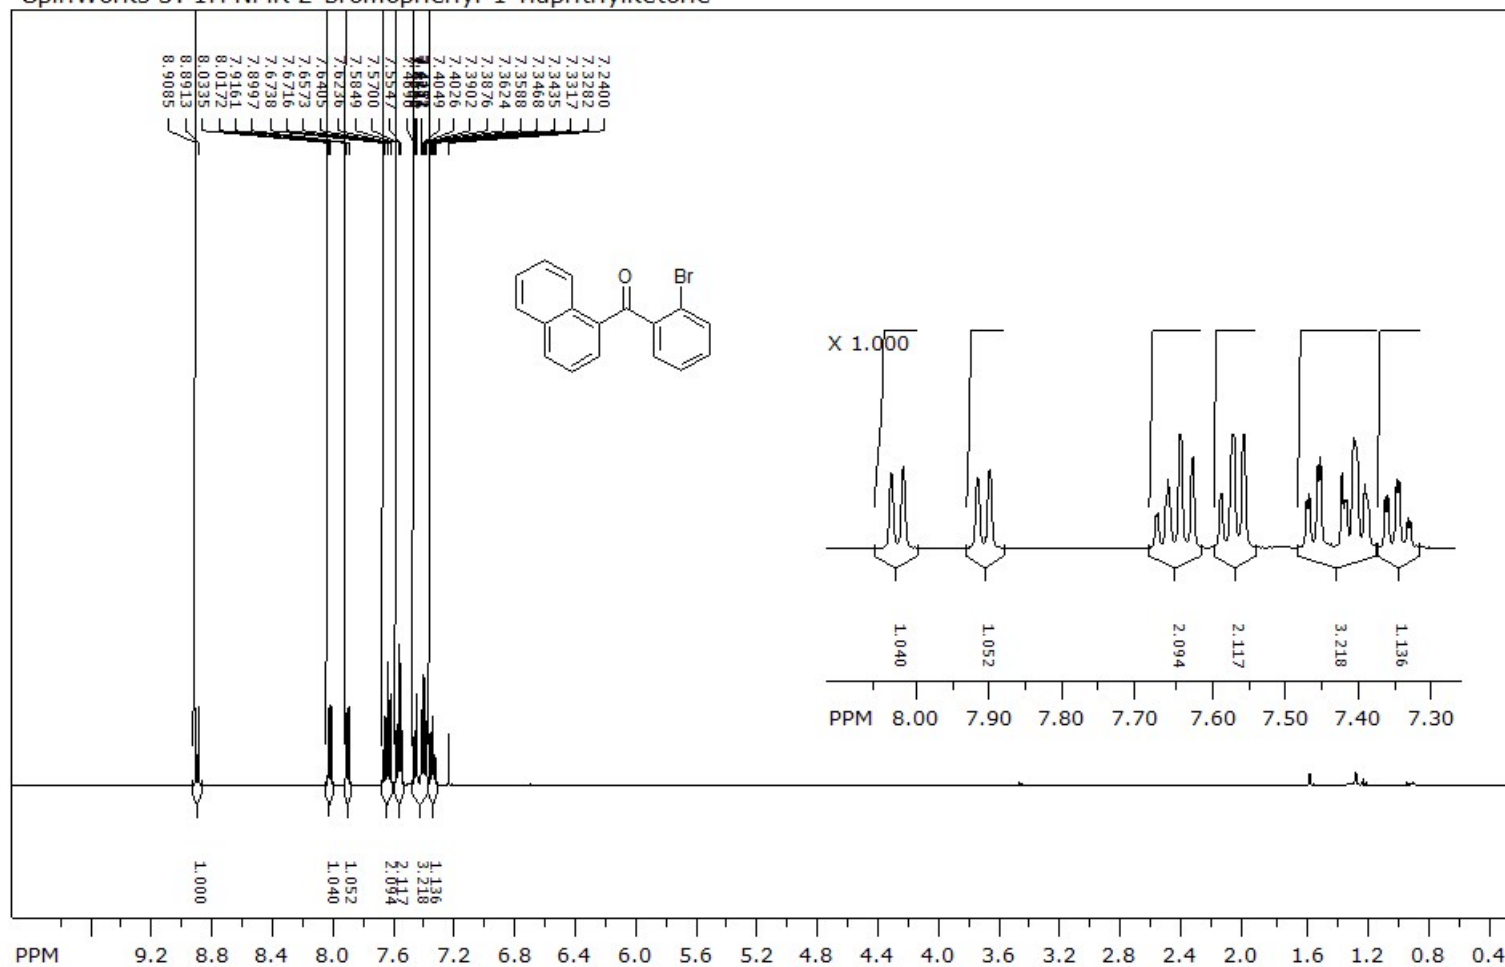

file: ...Users\Przemek\Desktop\MM66-1\1\fid exp: <zg30>  
 transmitter freq.: 500.133751 MHz  
 time domain size: 65536 points  
 width: 12500.00 Hz = 24.9933 ppm = 0.190735 Hz/pt  
 number of scans: 100

freq. of 0 ppm: 500.130024 MHz  
 processed size: 65536 complex points  
 LB: 0.300 GF: 0.0000  
 Hz/cm: 199.149 ppm/cm: 0.39819

SpinWorks 3: <sup>13</sup>C NMR 2-bromophenyl-1-naphthylketone

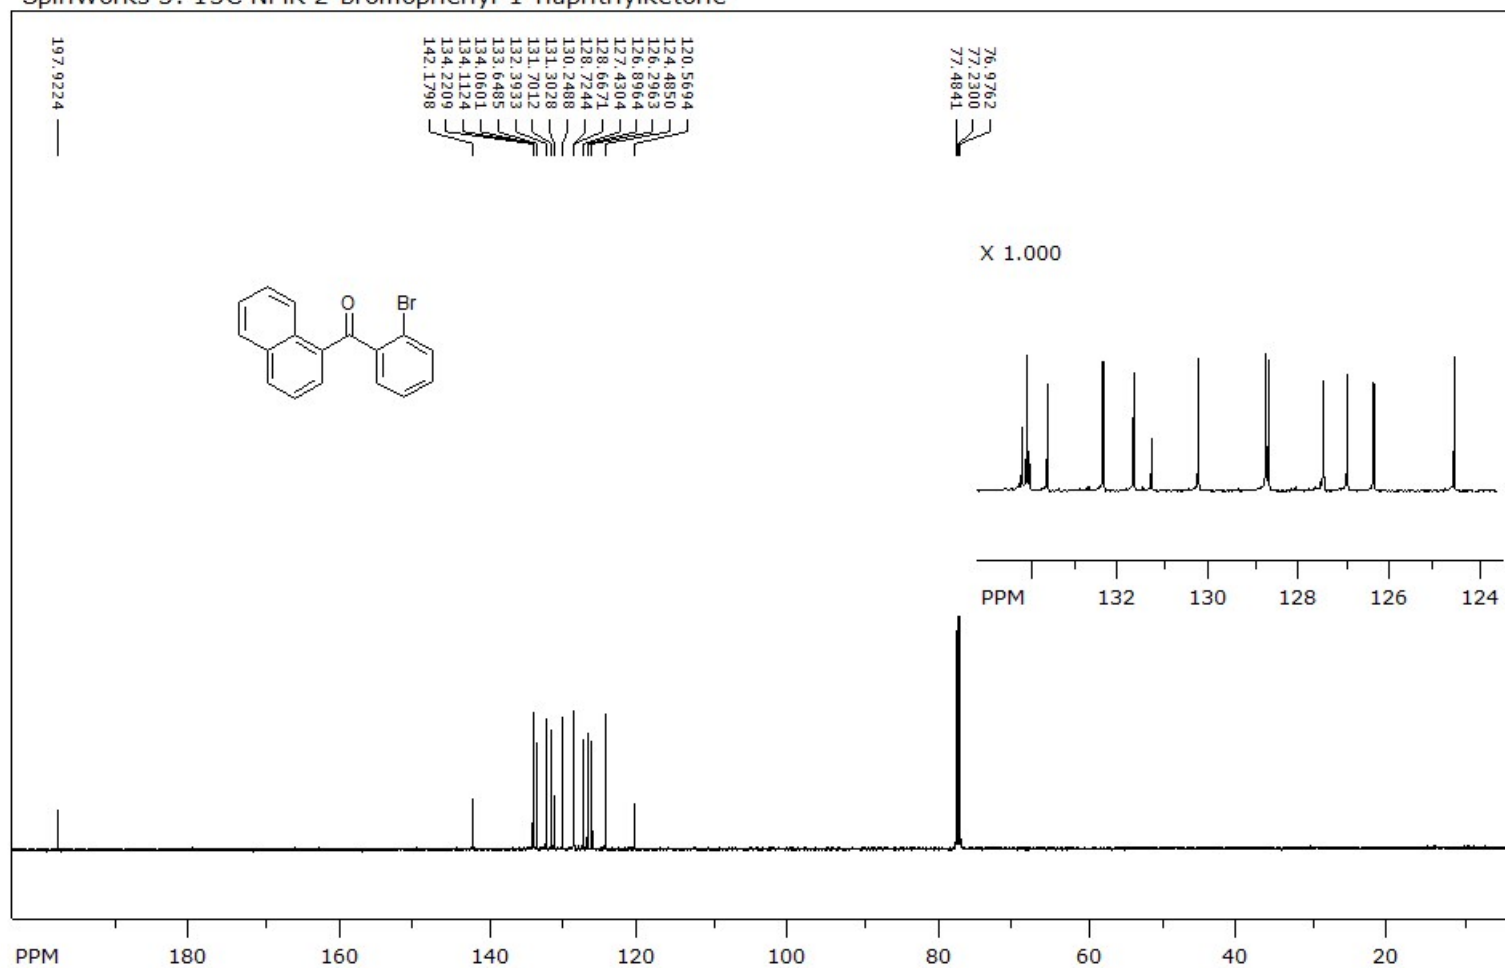

file: ...Users\Przemek\Desktop\MM66-1\2\fid exp: <zggp30>  
 transmitter freq.: 125.770364 MHz  
 time domain size: 65536 points  
 width: 29761.90 Hz = 236.6369 ppm = 0.454131 Hz/pt  
 number of scans: 1024

freq. of 0 ppm: 125.757765 MHz  
 processed size: 32768 complex points  
 LB: 1.000 GF: 0.0000  
 Hz/cm: 1016.211 ppm/cm: 8.07989

SpinWorks 3: 1H NMR 1,4-Phenylenebis(phenyl)methanone

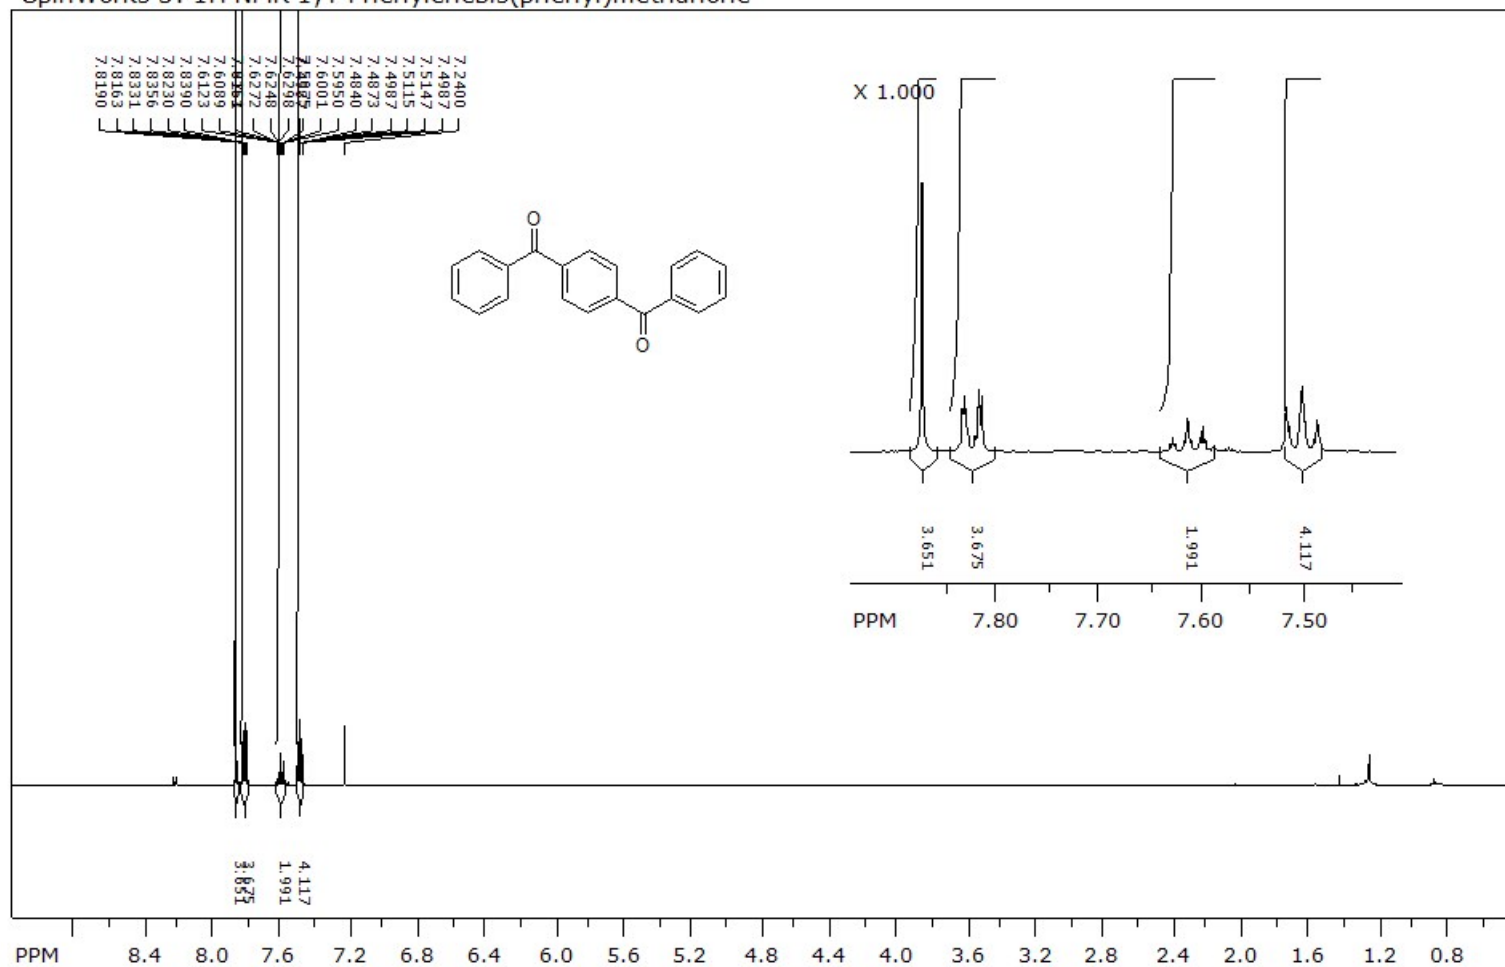

file: ...tów\Diarylowe ketony\PW8R728\1\fid exp: <zg30>  
 transmitter freq.: 500.133751 MHz  
 time domain size: 65536 points  
 width: 12500.00 Hz = 24.9933 ppm = 0.190735 Hz/pt  
 number of scans: 16

freq. of 0 ppm: 500.130024 MHz  
 processed size: 65536 complex points  
 LB: 0.300 GF: 0.0000  
 Hz/cm: 176.596 ppm/cm: 0.35310

SpinWorks 3: <sup>13</sup>C NMR 1,4-Phenylenebis(phenyl)methanone

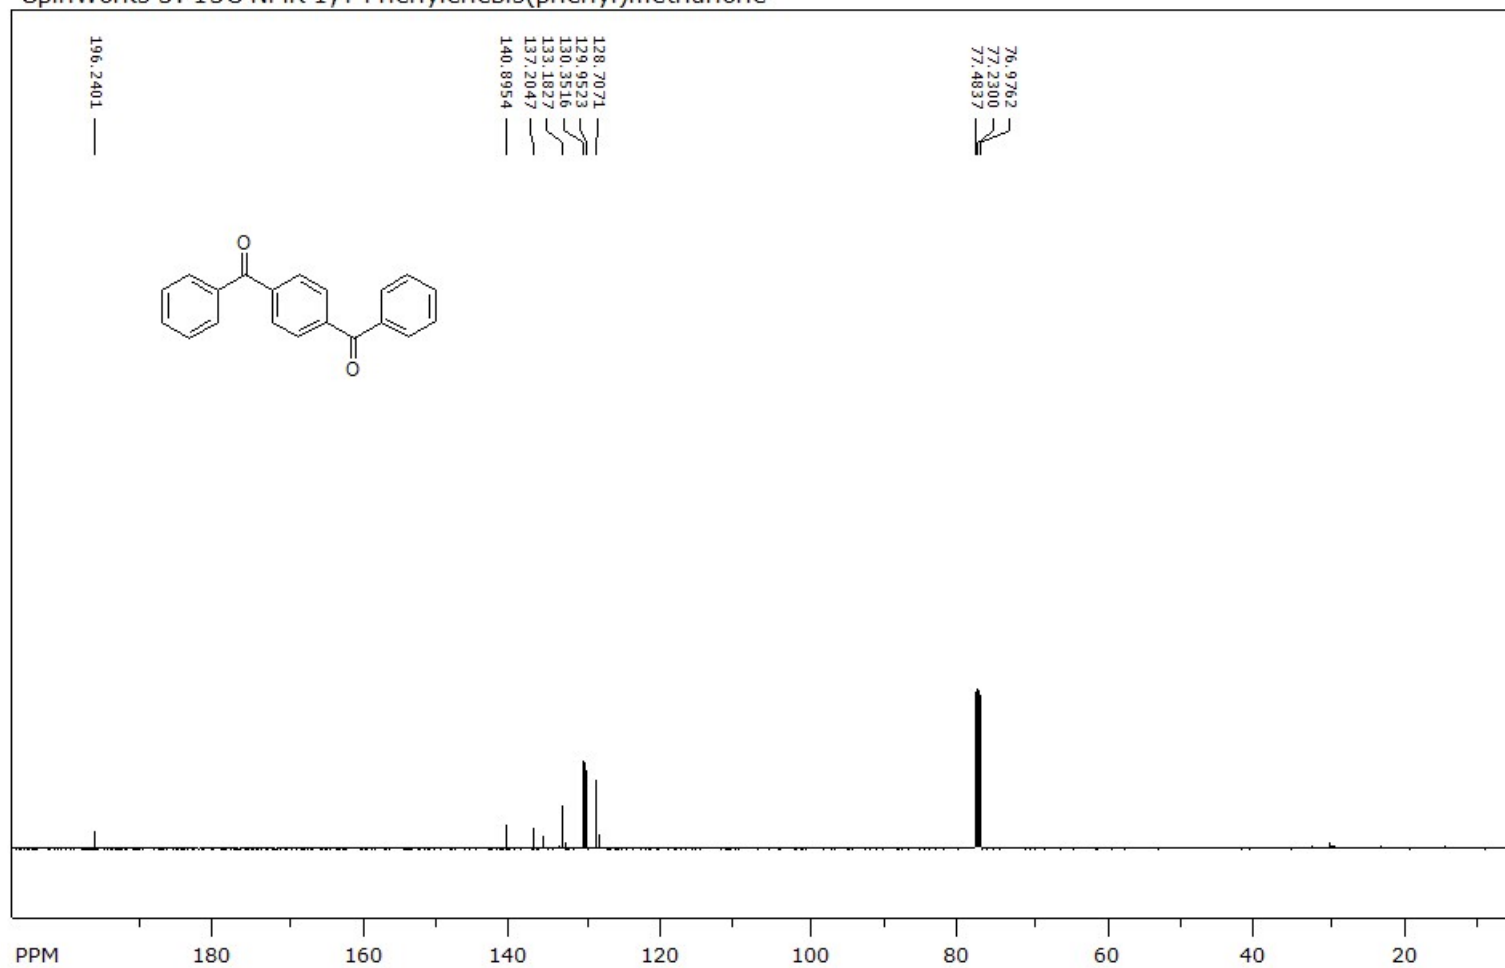

file: ...henylenebis(phenylmethanone)\2\fid exp: <zggg30>  
 transmitter freq.: 125.770364 MHz  
 time domain size: 65536 points  
 width: 29761.90 Hz = 236.6369 ppm = 0.454131 Hz/pt  
 number of scans: 2560

freq. of 0 ppm: 125.757762 MHz  
 processed size: 32768 complex points  
 LB: 1.000 GF: 0.0000  
 Hz/cm: 1022.290 ppm/cm: 8.12822



SpinWorks 3: 1H NMR 4-Acetylbenzophenone

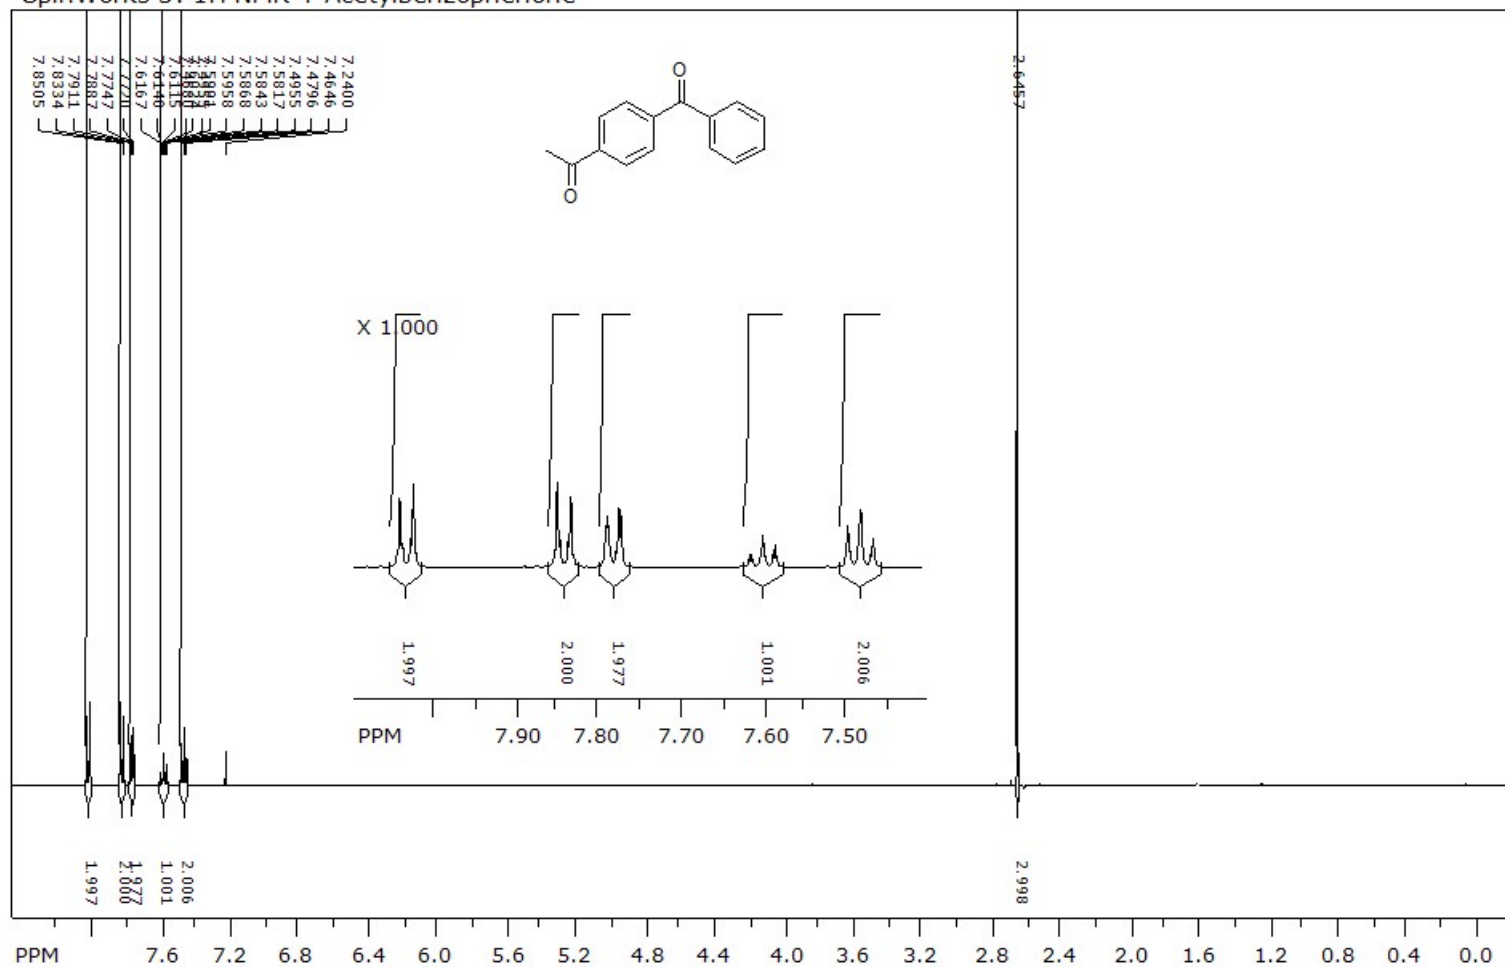

file: ...sers\Przemek\Desktop\PW6049B\1\fid exp: <zg30>  
 transmitter freq.: 500.133751 MHz  
 time domain size: 65536 points  
 width: 12500.00 Hz = 24.9933 ppm = 0.190735 Hz/pt  
 number of scans: 16

freq. of 0 ppm: 500.130024 MHz  
 processed size: 65536 complex points  
 LB: 0.300 GF: 0.0000  
 Hz/cm: 174.898 ppm/cm: 0.34970

SpinWorks 3: <sup>13</sup>C NMR 4-Acetylbenzophenone

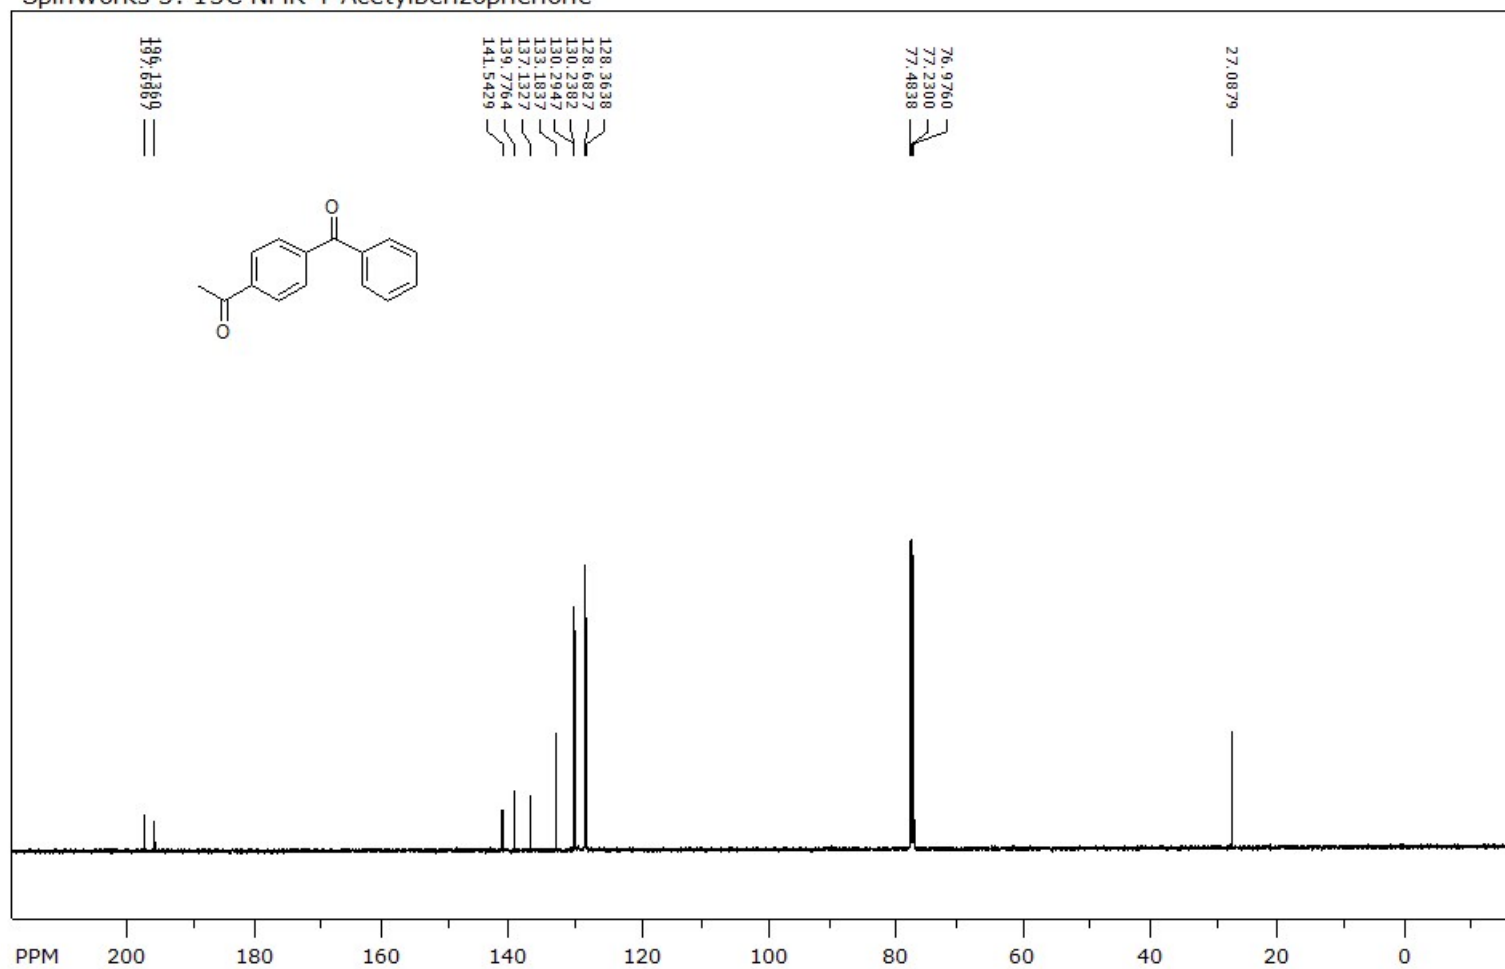

file: ...sers\Przemek\Desktop\PW6049B\2\fid exp: <zggp30>  
 transmitter freq.: 125.770364 MHz  
 time domain size: 65536 points  
 width: 29761.90 Hz = 236.6369 ppm = 0.454131 Hz/pt  
 number of scans: 1024

freq. of 0 ppm: 125.757763 MHz  
 processed size: 32768 complex points  
 LB: 1.000 GF: 0.0000  
 Hz/cm: 1190.476 ppm/cm: 9.46547

SpinWorks 3: 1H NMR 4-Methylbenzophenone

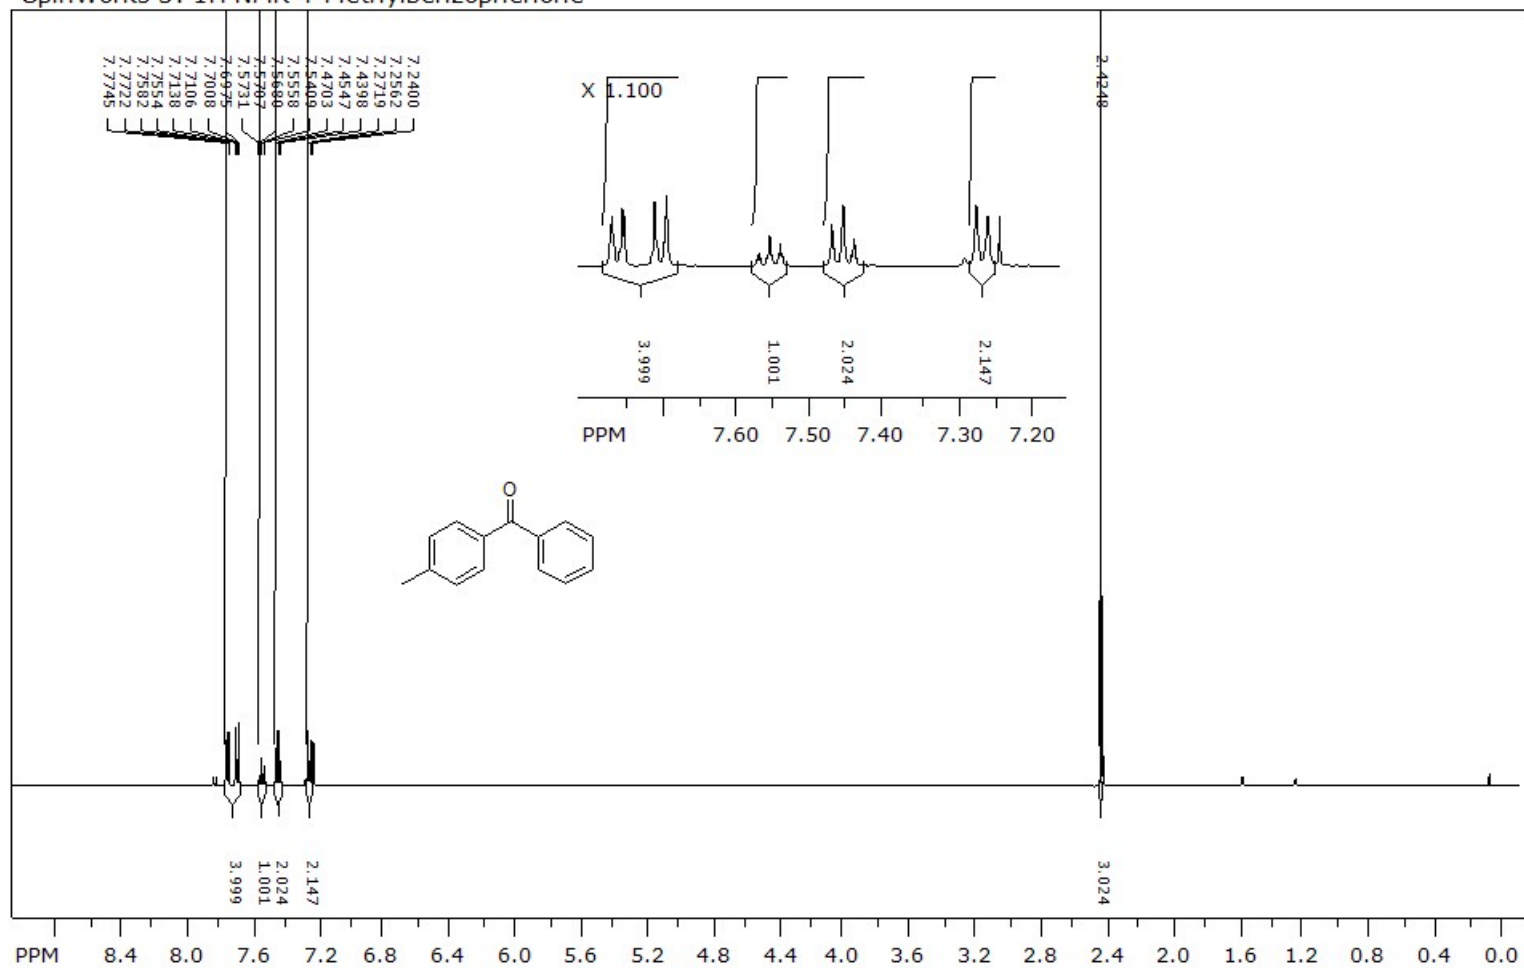

file: ...Users\Przemek\Desktop\PW6051\1\fid exp: <zg30>  
 transmitter freq.: 500.133751 MHz  
 time domain size: 65536 points  
 width: 12500.00 Hz = 24.9933 ppm = 0.190735 Hz/pt  
 number of scans: 16

freq. of 0 ppm: 500.130024 MHz  
 processed size: 65536 complex points  
 LB: 0.300 GF: 0.0000  
 Hz/cm: 184.255 ppm/cm: 0.36841

SpinWorks 3: 13C NMR 4-Methylbenzophenone

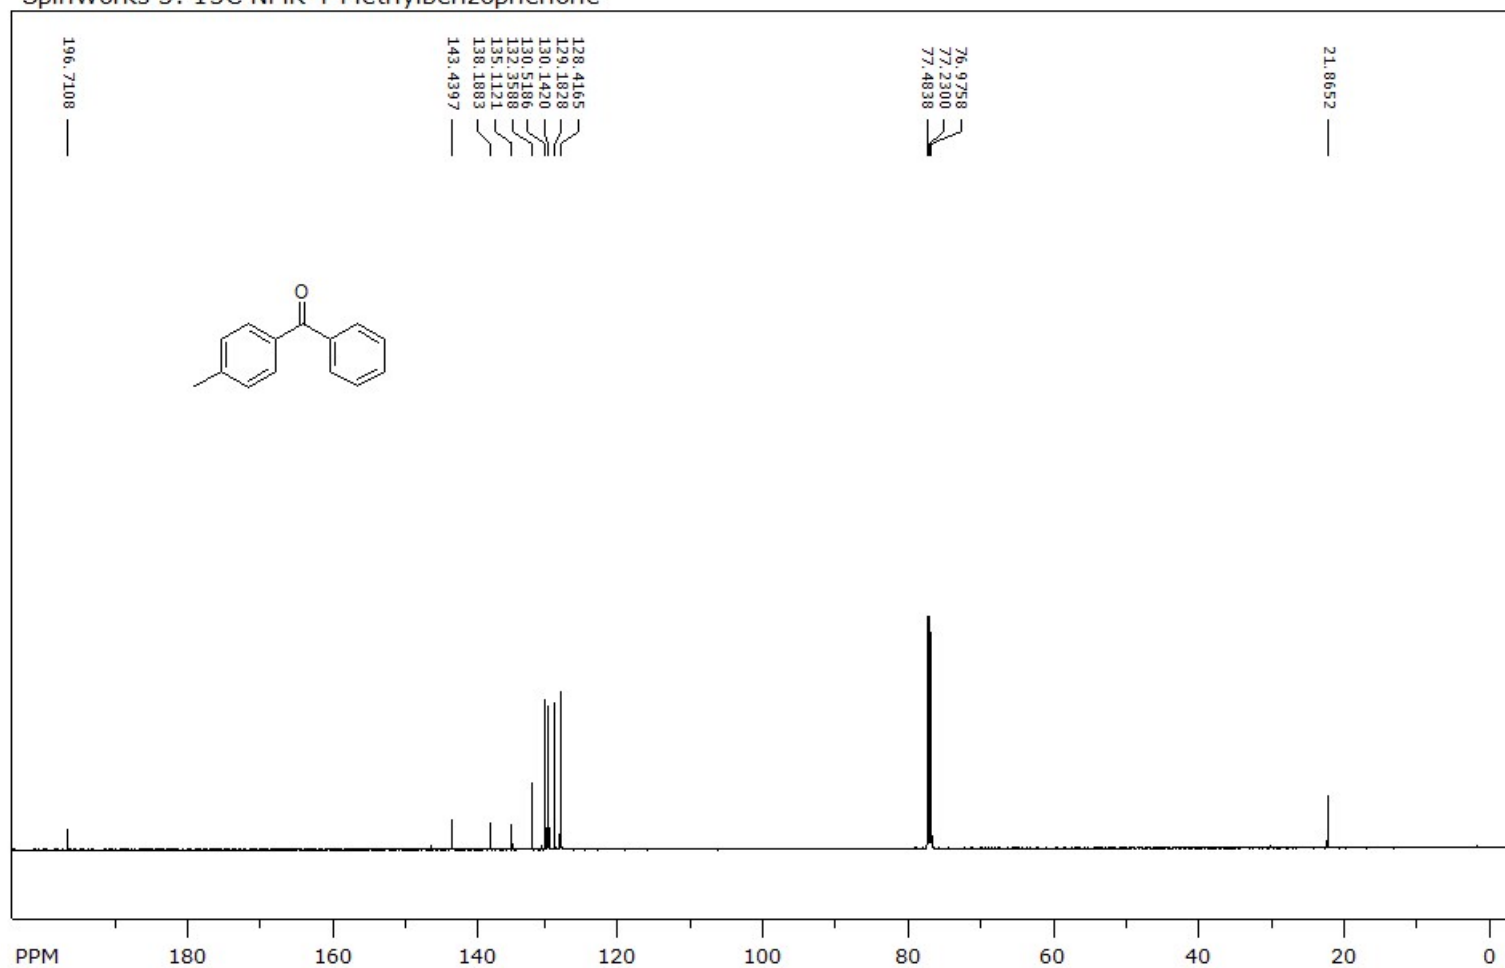

file: ...Users\Przemek\Desktop\PW6051\2\fid expt: <zggg30>  
 transmitter freq.: 125.770364 MHz  
 time domain size: 65536 points  
 width: 29761.90 Hz = 236.6369 ppm = 0.454131 Hz/pt  
 number of scans: 4096

freq. of 0 ppm: 125.757762 MHz  
 processed size: 32768 complex points  
 LB: 1.000 GF: 0.0000  
 Hz/cm: 1051.672 ppm/cm: 8.36184

SpinWorks 3: 1H NMR (4-methylnaphthalen-1-yl)(phenyl)methanone

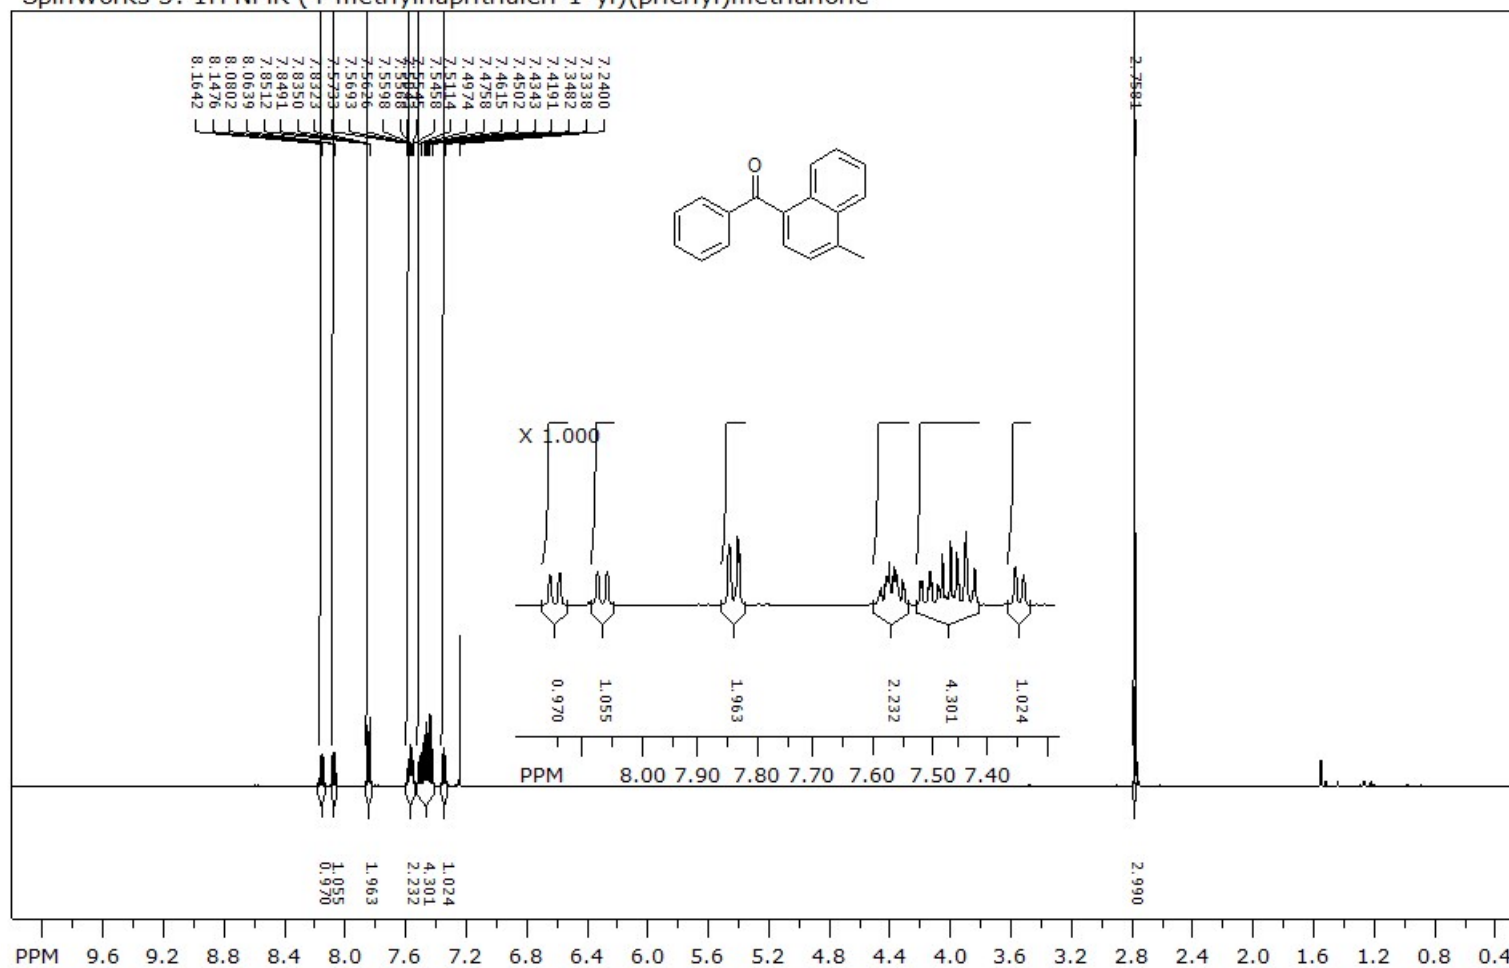

file: ...Users\Przemek\Desktop\MM55-1\1\fid expt: <zg30>  
 transmitter freq.: 500.133751 MHz  
 time domain size: 65536 points  
 width: 12500.00 Hz = 24.9933 ppm = 0.190735 Hz/pt  
 number of scans: 16

freq. of 0 ppm: 500.130024 MHz  
 processed size: 65536 complex points  
 LB: 0.300 GF: 0.0000  
 Hz/cm: 200.000 ppm/cm: 0.39989

SpinWorks 3: <sup>13</sup>C NMR (4-methylnaphthalen-1-yl)(phenyl)methanone

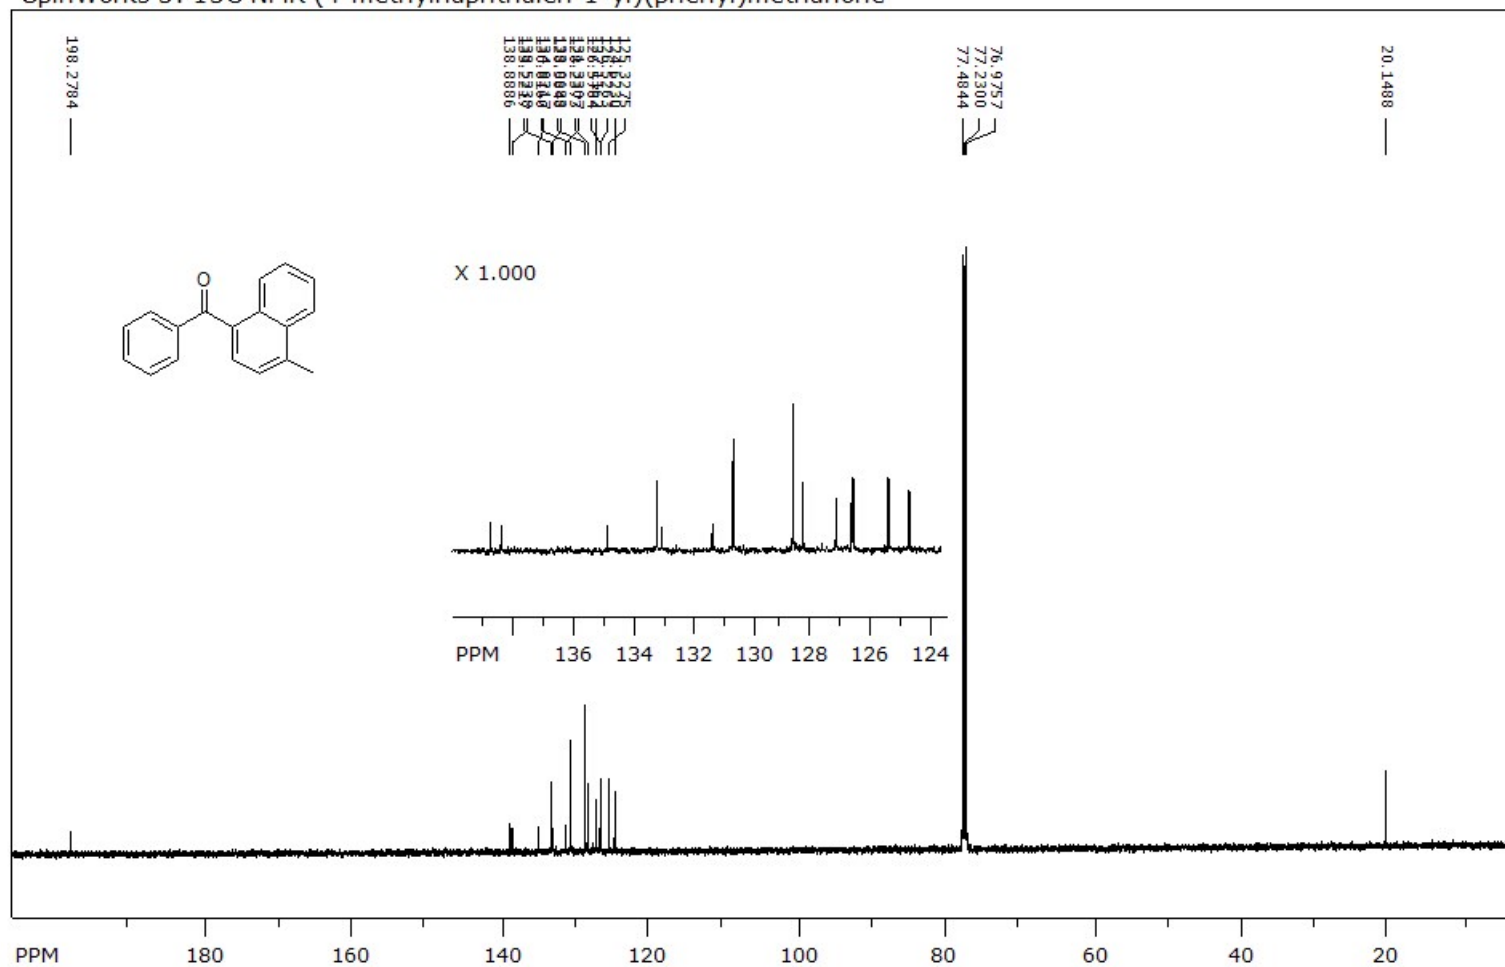

file: ...Users\Przemek\Desktop\MM55-1\2\fid exp: <zggp30>  
 transmitter freq.: 125.770364 MHz  
 time domain size: 65536 points  
 width: 29761.90 Hz = 236.6369 ppm = 0.454131 Hz/pt  
 number of scans: 1024

freq. of 0 ppm: 125.757761 MHz  
 processed size: 32768 complex points  
 LB: 1.000 GF: 0.0000  
 Hz/cm: 1027.356 ppm/cm: 8.16850

SpinWorks 3: 1H NMR 4-tert-Butylbenzophenone

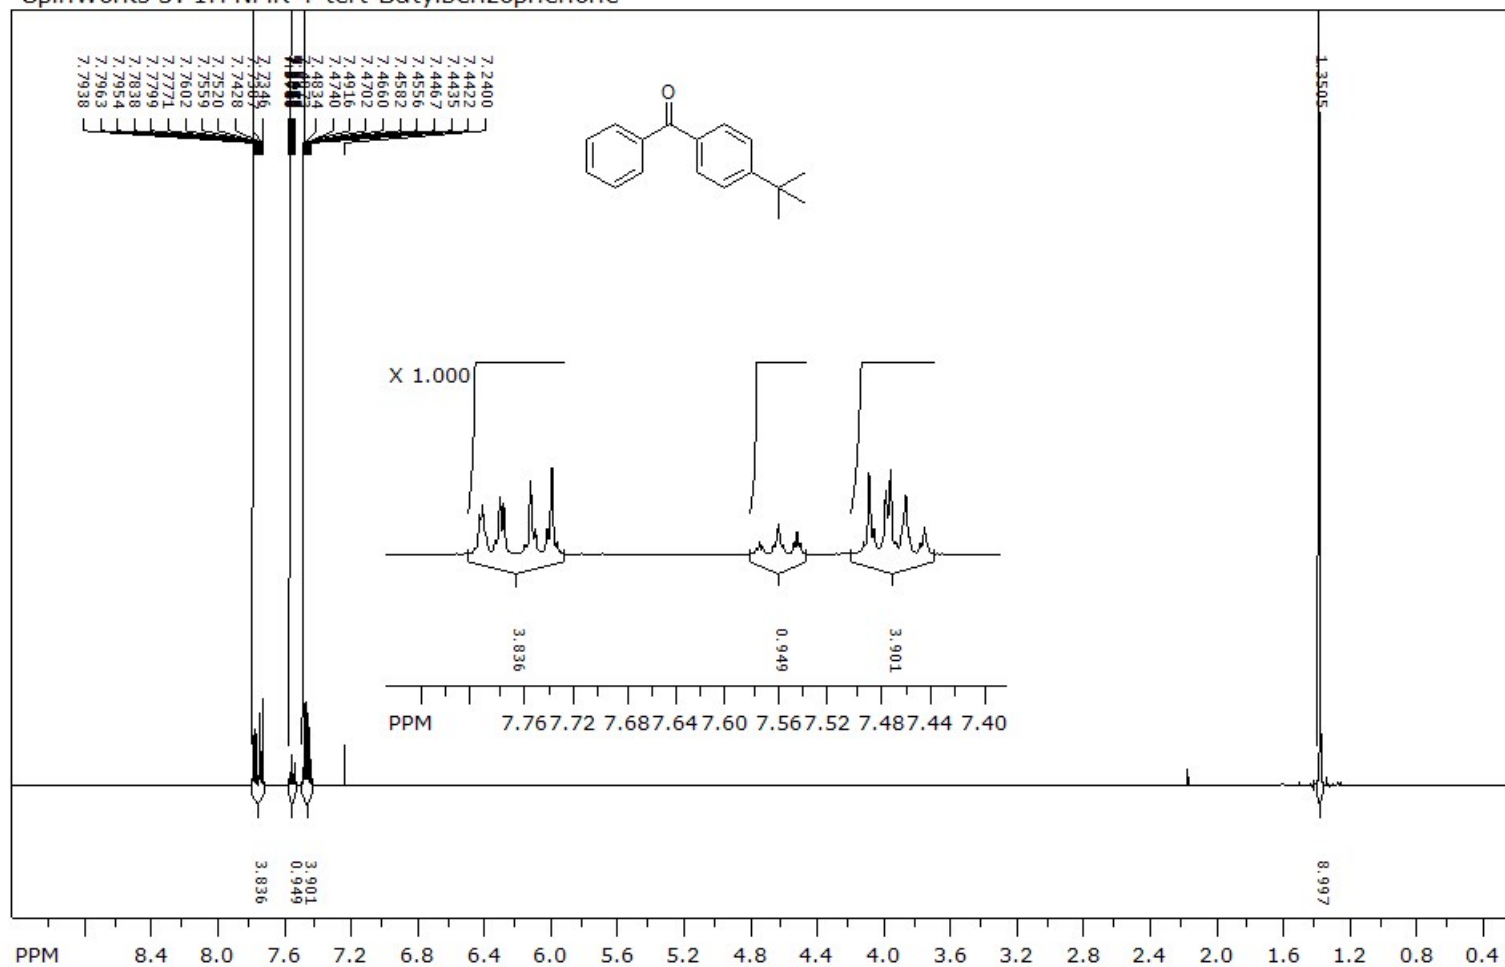

file: ...:\Users\Przemek\Desktop\MM62\1\fid exp: <zg30>  
 transmitter freq.: 500.133751 MHz  
 time domain size: 65536 points  
 width: 12500.00 Hz = 24.9933 ppm = 0.190735 Hz/pt  
 number of scans: 16

freq. of 0 ppm: 500.130024 MHz  
 processed size: 65536 complex points  
 LB: 0.300 GF: 0.0000  
 Hz/cm: 182.128 ppm/cm: 0.36416

SpinWorks 3: 13C NMR 4-tert-Butylbenzophenone

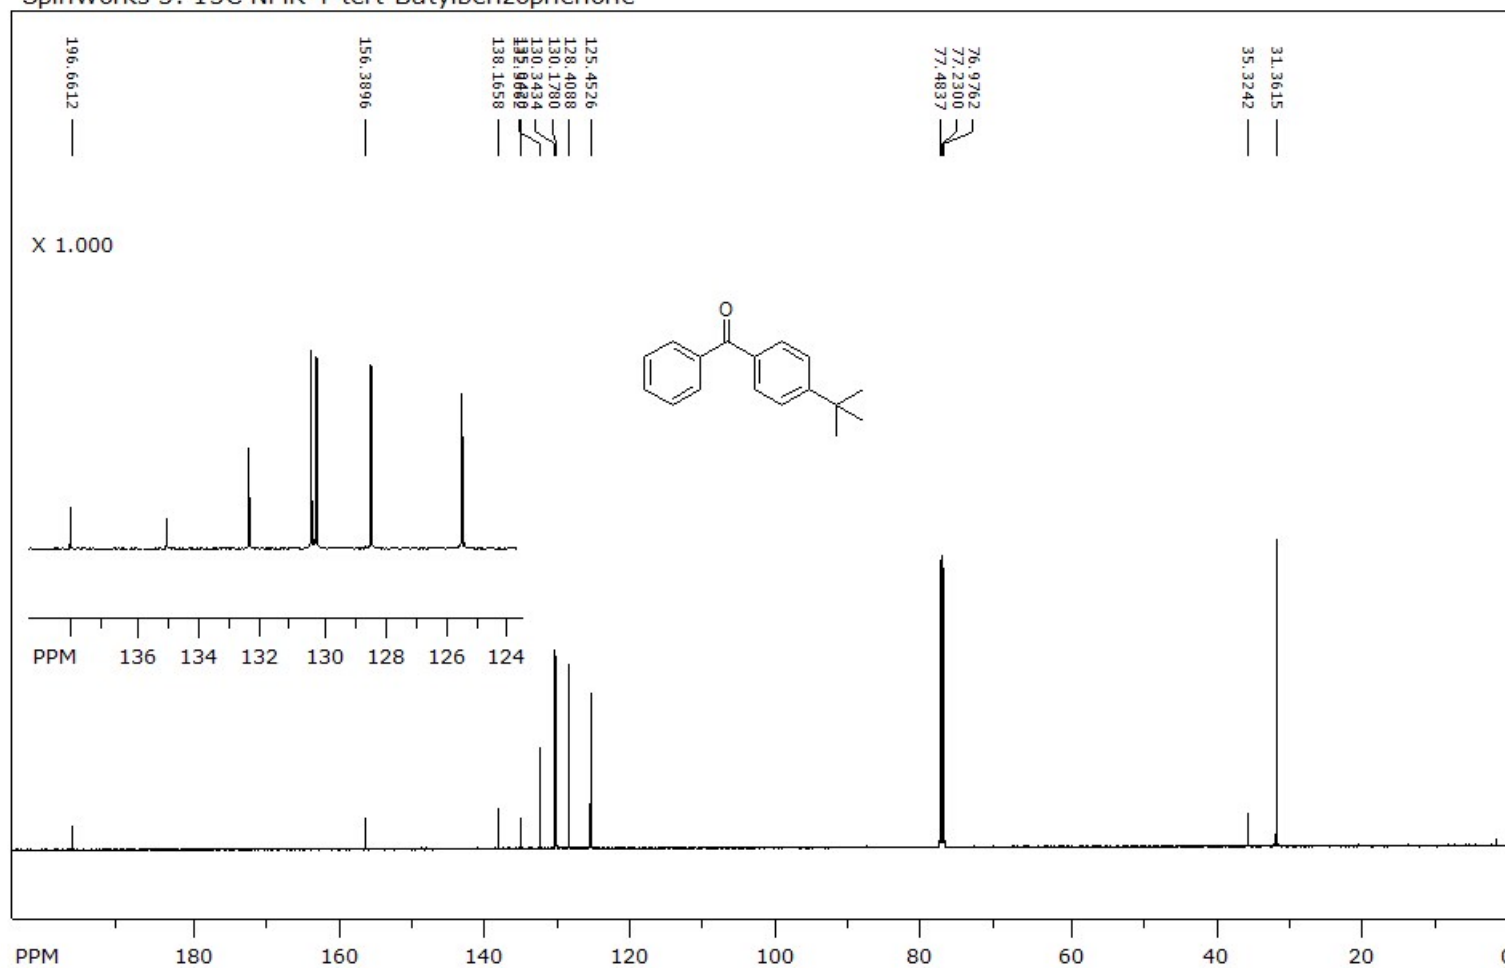

file: ...:\Users\Przemek\Desktop\MM62\2\fid expt: <zpgg30>  
 transmitter freq.: 125.770364 MHz  
 time domain size: 65536 points  
 width: 29761.90 Hz = 236.6369 ppm = 0.454131 Hz/pt  
 number of scans: 4096

freq. of 0 ppm: 125.757763 MHz  
 processed size: 32768 complex points  
 LB: 1.000 GF: 0.0000  
 Hz/cm: 1040.527 ppm/cm: 8.27323



SpinWorks 3: 1H NMR Ethyl benzoate

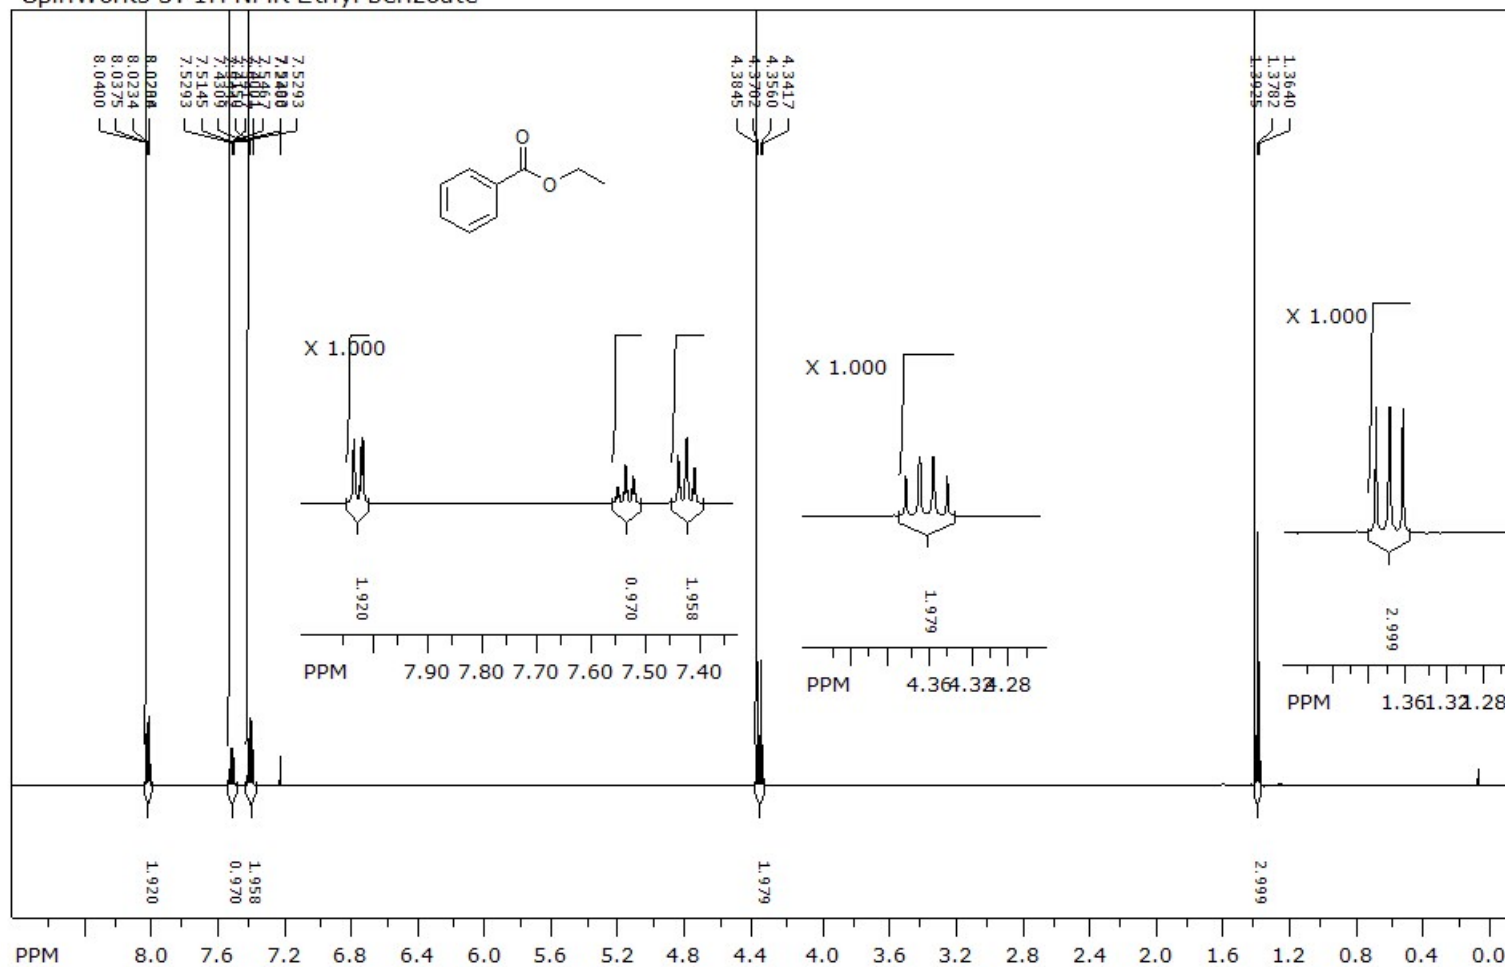

file: ...:\Users\Przemek\Desktop\MM58\1\fid exp: <zg30>  
 transmitter freq.: 500.133751 MHz  
 time domain size: 65536 points  
 width: 12500.00 Hz = 24.9933 ppm = 0.190735 Hz/pt  
 number of scans: 16

freq. of 0 ppm: 500.130024 MHz  
 processed size: 65536 complex points  
 LB: 0.300 GF: 0.0000  
 Hz/cm: 180.851 ppm/cm: 0.36161

SpinWorks 3: <sup>13</sup>C NMR Ethyl benzoate

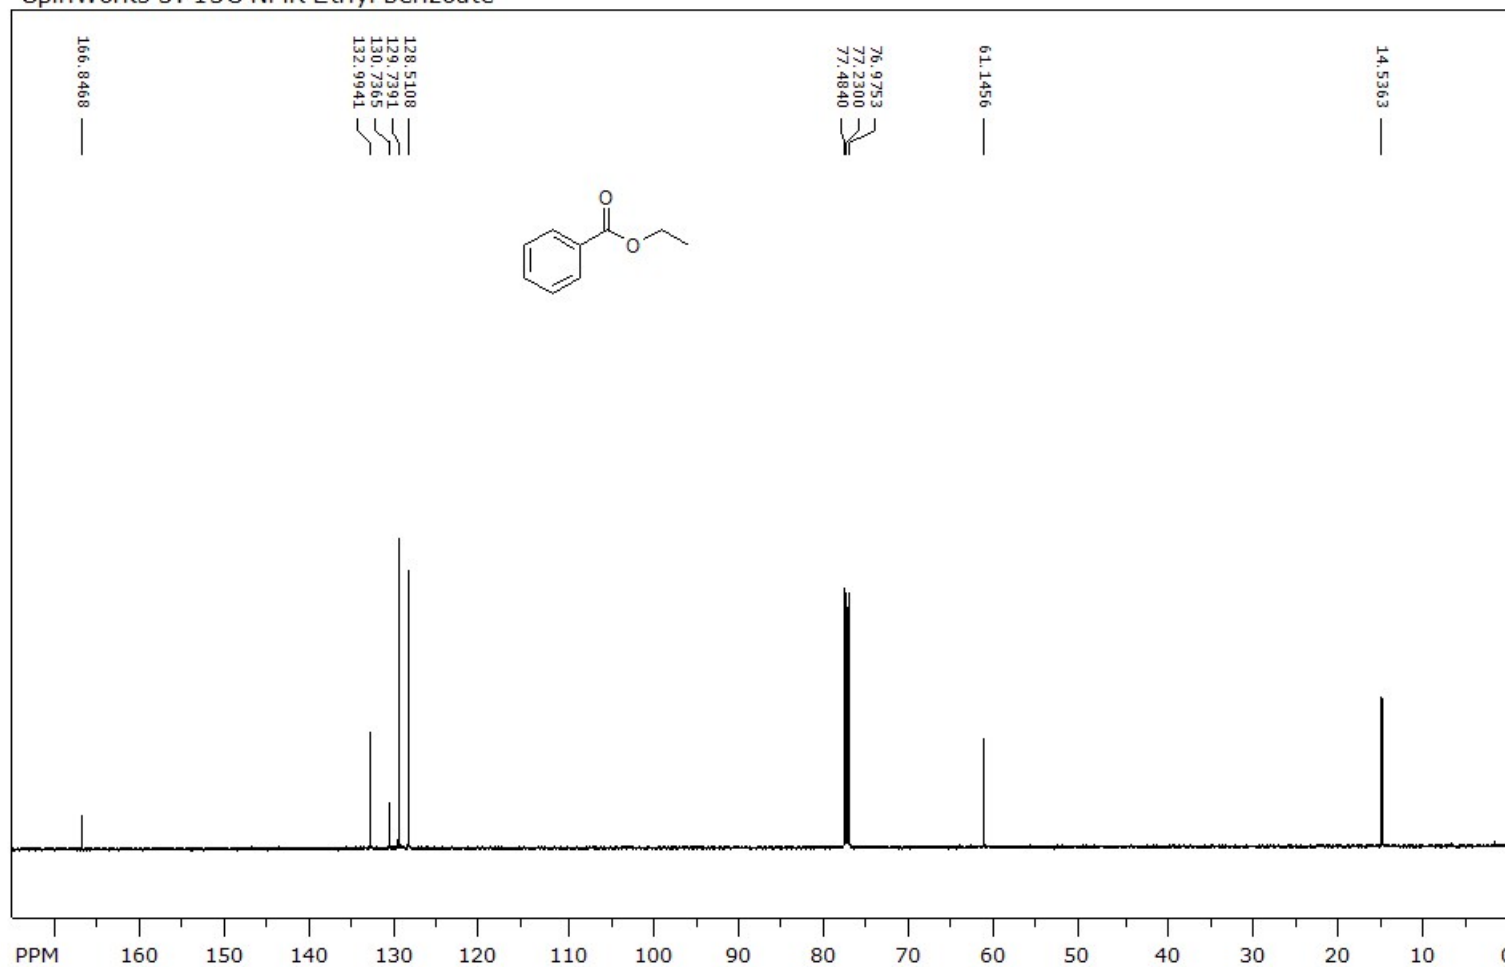

file: ...:\Users\Przemek\Desktop\MM58\2\fid exp: <zpgg30>  
transmitter freq.: 125.770364 MHz  
time domain size: 65536 points  
width: 29761.90 Hz = 236.6369 ppm = 0.454131 Hz/pt  
number of scans: 1024

freq. of 0 ppm: 125.757762 MHz  
processed size: 32768 complex points  
LB: 1.000 GF: 0.0000  
Hz/cm: 888.551 ppm/cm: 7.06487

SpinWorks 3: 1H NMR Propan-2-yl benzoate

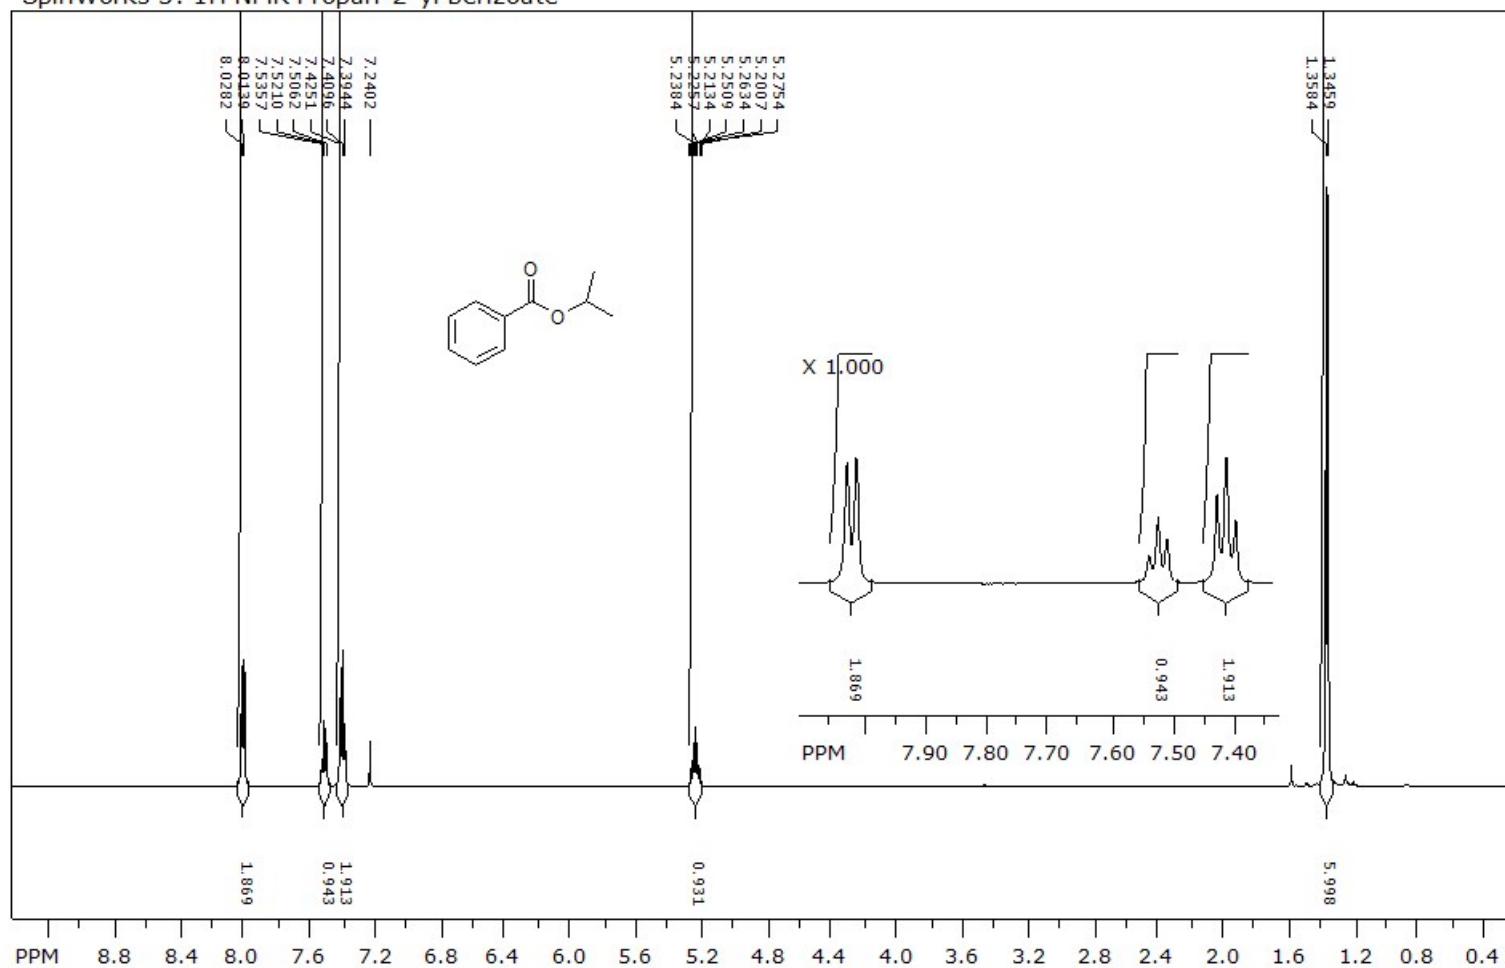

file: ...Users\Przemek\Desktop\MM57-2\1\fid exp: <zg30>  
 transmitter freq.: 500.133751 MHz  
 time domain size: 65536 points  
 width: 12500.00 Hz = 24.9933 ppm = 0.190735 Hz/pt  
 number of scans: 16

freq. of 0 ppm: 500.130023 MHz  
 processed size: 65536 complex points  
 LB: 0.300 GF: 0.0000  
 Hz/cm: 185.532 ppm/cm: 0.37096

SpinWorks 3: <sup>13</sup>C NMR Propan-2-yl benzoate

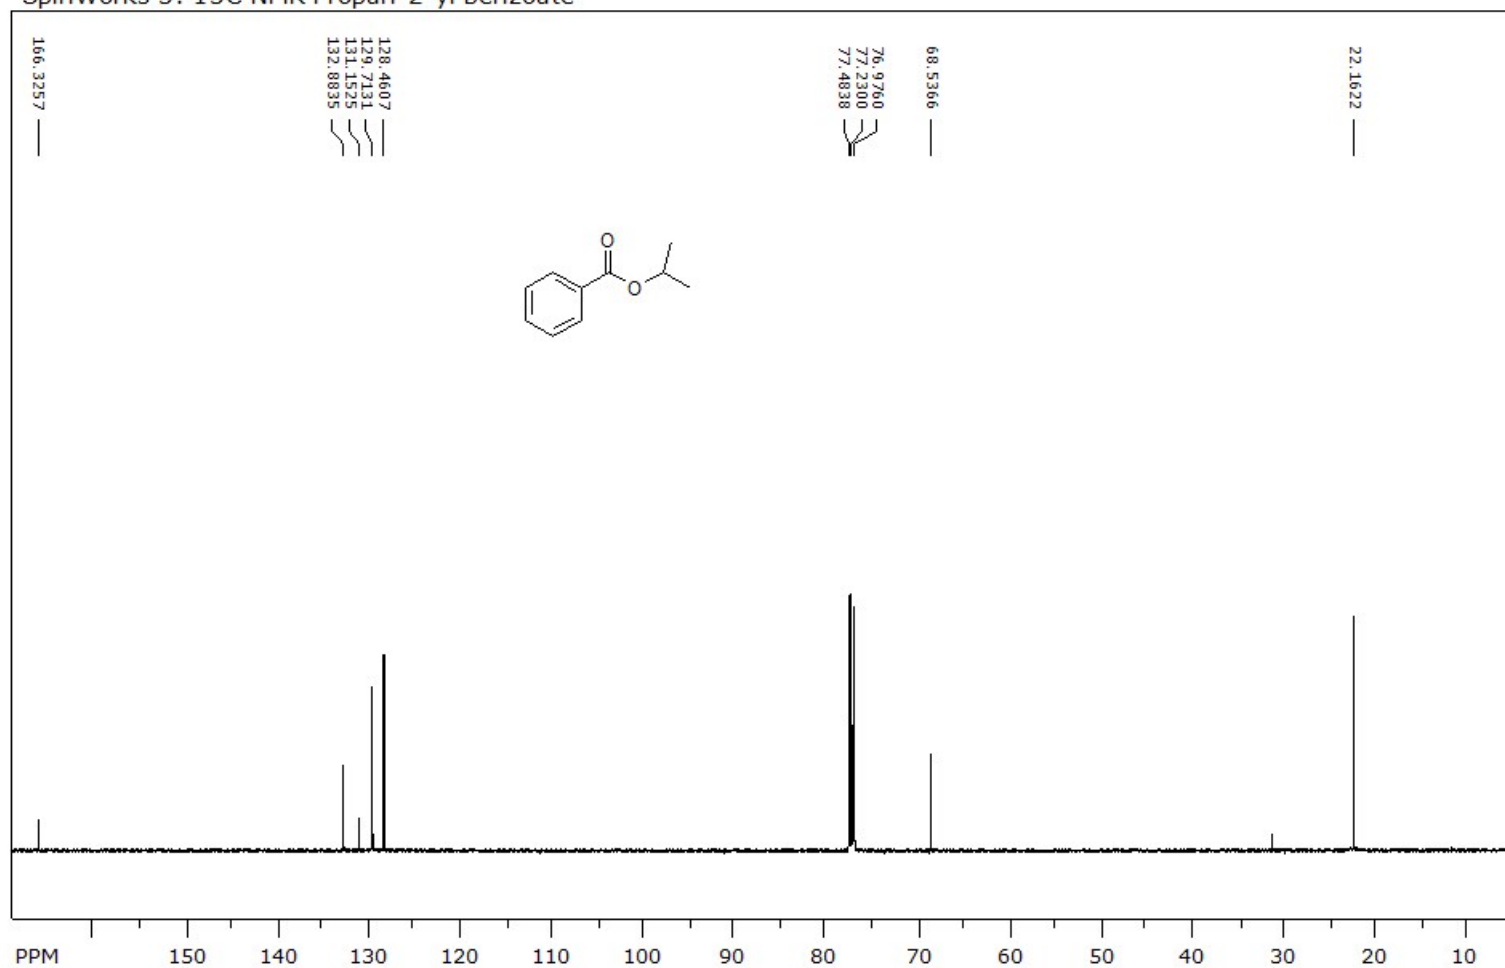

file: ...Users\Przemek\Desktop\MM57-2\2\fid expt: <zggp30>  
transmitter freq.: 125.770364 MHz  
time domain size: 65536 points  
width: 29761.90 Hz = 236.6369 ppm = 0.454131 Hz/pt  
number of scans: 1024

freq. of 0 ppm: 125.757762 MHz  
processed size: 32768 complex points  
LB: 1.000 GF: 0.0000  
Hz/cm: 830.800 ppm/cm: 6.60569

SpinWorks 3: 1H NMR Methyl benzoate

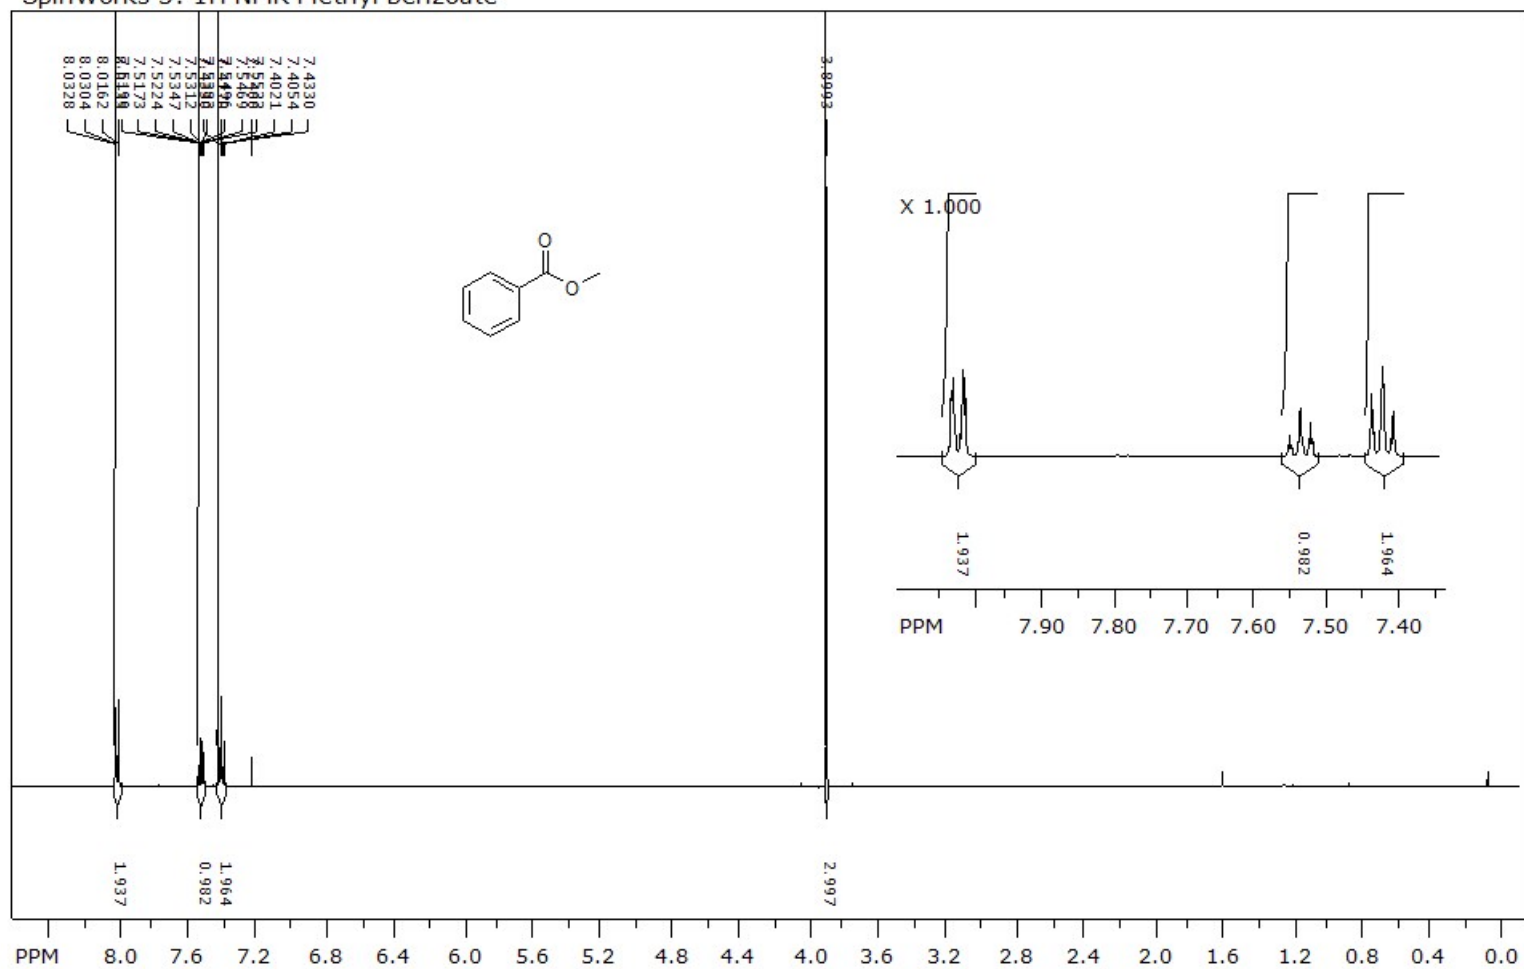

file: ...:\Users\Przemek\Desktop\MM67\1\fid expt: <zg30>  
 transmitter freq.: 500.133751 MHz  
 time domain size: 65536 points  
 width: 12500.00 Hz = 24.9933 ppm = 0.190735 Hz/pt  
 number of scans: 16

freq. of 0 ppm: 500.130024 MHz  
 processed size: 65536 complex points  
 LB: 0.300 GF: 0.0000  
 Hz/cm: 175.319 ppm/cm: 0.35054

SpinWorks 3: <sup>13</sup>C NMR Methyl benzoate

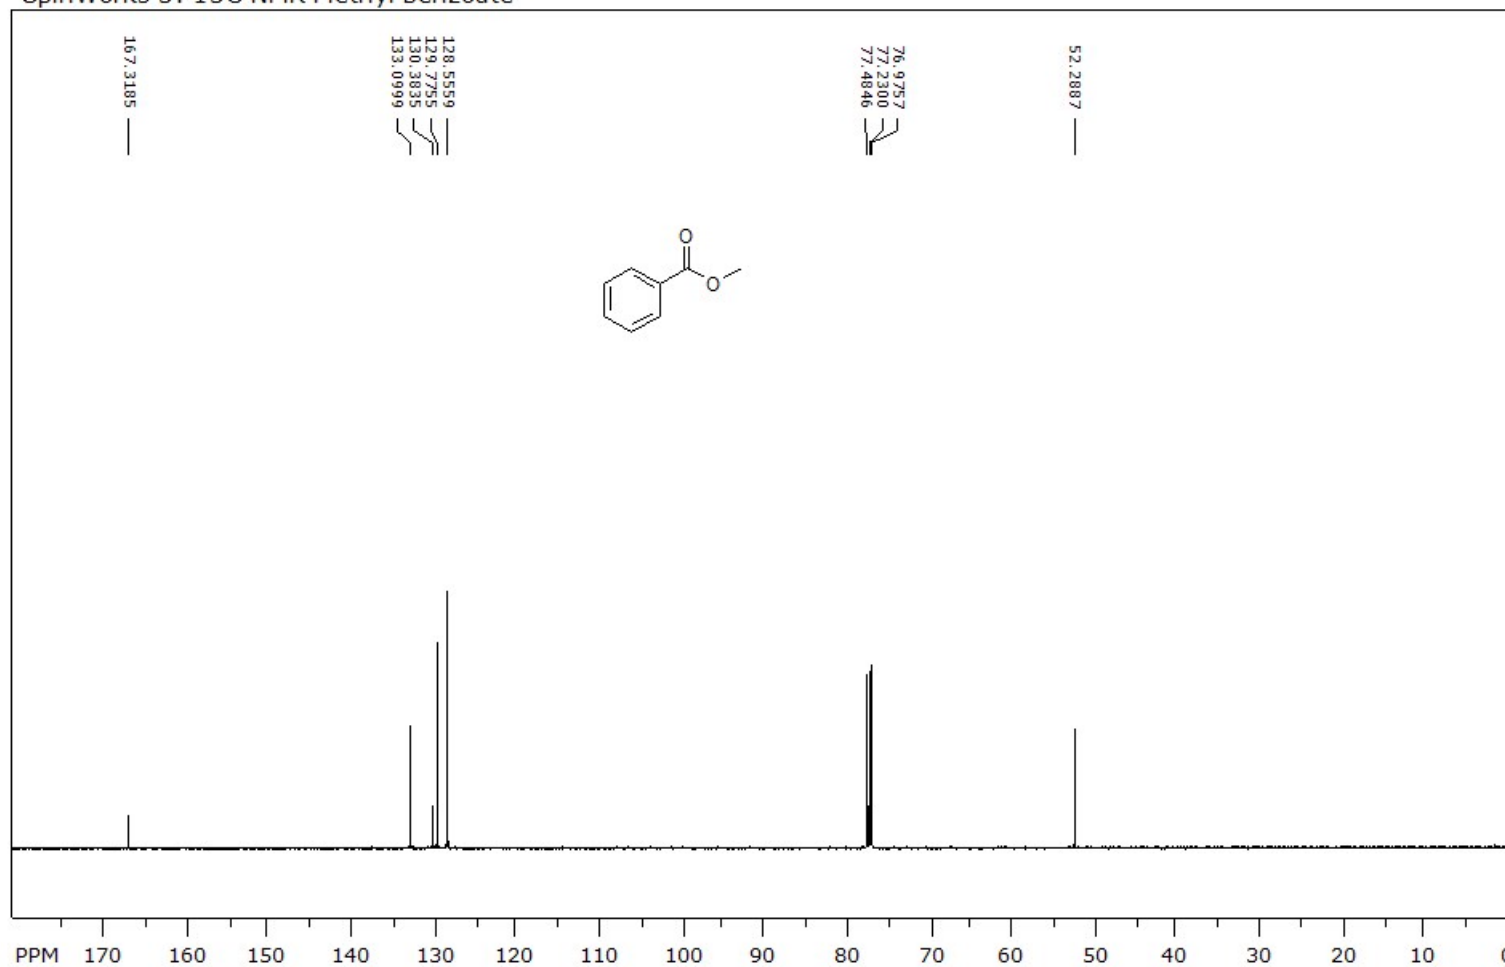

file: ...:\Users\Przemek\Desktop\MM67\2\fid exp: <zggg30>  
transmitter freq.: 125.770364 MHz  
time domain size: 65536 points  
width: 29761.90 Hz = 236.6369 ppm = 0.454131 Hz/pt  
number of scans: 1024

freq. of 0 ppm: 125.757763 MHz  
processed size: 32768 complex points  
LB: 1.000 GF: 0.0000  
Hz/cm: 921.986 ppm/cm: 7.33071
